# Supplementary material
Source: MDPI journal article supplement (https://www.mdpi.com/2036-7481/12/4/60)
Supplement: s1 [file s1]

# Supplementary Materials: Culturable Endophytic Fungi from *Glycyrrhiza inflata* Distributed in Xinjiang, China with Antifungal Activity

## Contents

|                                                                                                                                                                                                                                                                                                                                                                                                                                                 |    |
|-------------------------------------------------------------------------------------------------------------------------------------------------------------------------------------------------------------------------------------------------------------------------------------------------------------------------------------------------------------------------------------------------------------------------------------------------|----|
| <b>Figure S1.</b> The aerial parts (a), and roots (b) of <i>Glycyrrhiza inflata</i> collected in Xinjiang (86°34'27" E, 42°03'32" N), Northwest of China, in October 2, 2020.....                                                                                                                                                                                                                                                               | 3  |
| <b>Figure S2.</b> The ITS1-5.8S-ITS2 partial sequences of 22 fungal isolates (i.e., Glinf001-Glinf022).....                                                                                                                                                                                                                                                                                                                                     | 9  |
| <b>Figure S3.</b> Mycelial growth inhibition of the ethyl acetate extracts from 22 endophytic fungal strains on <i>Rhizoctonia solani</i> . The word “extract” was abbreviated as “extr.”. The concentration of each extract in the medium was 100 µg/mL. The positive control was carbendazim with the concentration in medium was 100 µg/mL. The negative control was DMSO with its concentration in medium was 0.7 µL/mL. ....               | 10 |
| <b>Figure S4.</b> Mycelial growth inhibition of the ethyl acetate extracts from 22 endophytic fungal strains on <i>Magnaporthe oryzae</i> . The word “extract” was abbreviated as “extr.”. The concentration of each extract in the medium was 100 µg/mL. The positive control was carbendazim with the concentration in medium was 100 µg/mL. The negative control was DMSO with its concentration in medium was 0.7 µL/mL. ....               | 11 |
| <b>Figure S5.</b> Mycelial growth inhibition of the ethyl acetate extracts from 22 endophytic fungal strains on <i>Ustilaginoidea virens</i> strain P1. The word “extract” was abbreviated as “extr.”. The concentration of each extract in the medium was 100 µg/mL. The positive control was carbendazim with the concentration in medium was 100 µg/mL. The negative control was DMSO with its concentration in medium was 0.7 µL/mL. ....   | 12 |
| <b>Figure S6.</b> Mycelial growth inhibition of the ethyl acetate extracts from 22 endophytic fungal strains on <i>Ustilaginoidea virens</i> strain LN02. The word “extract” was abbreviated as “extr.”. The concentration of each extract in the medium was 100 µg/mL. The positive control was carbendazim with the concentration in medium was 100 µg/mL. The negative control was DMSO with its concentration in medium was 0.7 µL/mL. .... | 13 |
| <b>Figure S7.</b> Morphological characteristics of 22 endophytic fungal isolates from the roots of <i>Glycyrrhiza inflata</i> . ....                                                                                                                                                                                                                                                                                                            | 17 |
| <b>Table S1.</b> One-way ANOVA method was employed for statistical analysis of the inhibitions of 23 treatments on the pathogen <i>Rhizoctonia solani</i> . Nos. 1-22 were EtOAc extracts of endophytes and No. 23 was the positive control carbendazim.....                                                                                                                                                                                    | 18 |
| <b>Table S2.</b> One-way ANOVA method was employed for statistical analysis of the inhibitions of 23 treatments on the pathogen <i>Magnaporthe oryzae</i> . Nos. 1-22 were EtOAc extracts of endophytes and No. 23 was the positive control carbendazim.....                                                                                                                                                                                    | 33 |
| <b>Table S3.</b> One-way ANOVA method was employed for statistical analysis of the inhibitions of 23 treatments on the pathogen <i>Villosicalva virens</i> P1. Nos. 1-22 were EtOAc extracts of endophytes and No. 23 was the                                                                                                                                                                                                                   |    |

positive control carbendazim..... 48

**Table S4.** One-way ANOVA method was employed for statistical analysis of the inhibitions of 23 treatments on the pathogen *Villosicalva virens* LN-02. Nos. 1-22 were EtOAc extracts of endophytes and No. 23 was the positive control carbendazim..... 63

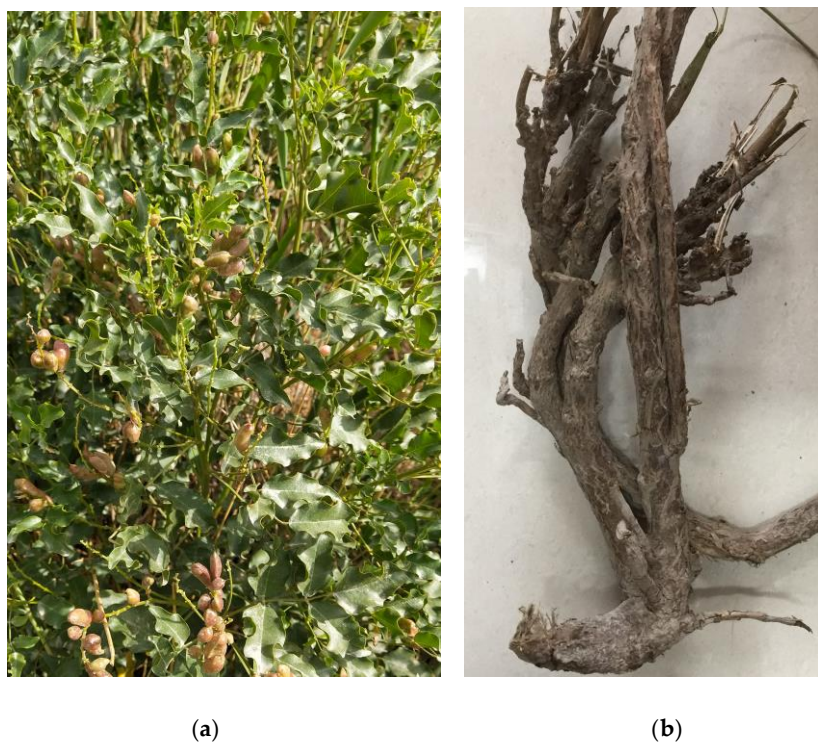

**Figure S1.** The aerial parts (a), and roots (b) of *Glycyrrhiza inflata* collected in Xinjiang (86°34'27" E, 42°03'32" N), Northwest of China, in October 2, 2020.

**Glinf001:**

TTCCTCCGGCTTTATTGATATGCTTAAGTTCAGCGGGTATCCCTACCTGATCCGAGGTCAACCTGGTAA  
 AATAGAAGGTTGGAGACGCCGGCTGGCGCCCGGCCGCCCTAATCGAGCGGGTGACAAAGCCCCAT  
 ACGCTCGAGGACCGGACGCGGTGCCGCCGCTGCCTTTCGGGCCCGTCCCCCGGGGGGACGACGACC  
 CAACACACAAGCCGGGCTTGAAGGGCAGCAATGACGCTCGGACAGGCATGCCCCCGGAATGCCAG  
 GGGGCGCAATGTGCGTTCAAAGACTCGATGATTCACTGAATTCTGCAATTCACATTACTTATCGCAGT  
 TCGCTGCGTTCTTCATCGATGCCGGAACCAAGAGATCCATTGTTGAAAGTTTAAATAGGTTTGCTATCA  
 AGCTCAGACAACACTAAAGACAAGAGGTTCAATGTGGTCTCCGGCGGCTACCCCCGGGGGGCGCA  
 CCGCCGAAGCAACGTTGGTCAGGTATTCACGGGTGGGAGGTTAGGCCTGCCCGGGGGCAGACCTGCA  
 CTCGGTAATGATCCTTCCGCAGGTTACCCCTACGG

**Glinf002:**

CTTATTGATATGCTTAAGTTCAGCGGGTATCCCTACCTGATCCGAGGTCAACCTGGTAAAATAAAAGG  
 TTGGAGACGCCGGCTGGCGCCCGGCCGCCCTAATCGAGCGGGTGACAAAGCCCCATACGCTCGAG  
 GACCGGACGCGGTGCCGCCGCTGCCTTTCGGGCCCGTCCCCCGGAGGGGACGACGACCCAACACAC  
 AAGCCGGGCTTGAAGGGCAGCAATGACGCTCGGACAGGCATGCCCCCGGAATGCCAGGGGGCGCA  
 ATGTGCGTTCAAAGACTCGATGATTCACTGAATTCTGCAATTCACATTACTTATCGCAGTTCGCTGCGT  
 TCTTCATCGATGCCGGAACCAAGAGATCCATTGTTGAAAGTTTAAATAGGTTTGCTATCAAGCTCAGA  
 CAACACTAAAGACAAGAGGTTCAATGTGGTCTCCGGCGGCTACCCCCGAGGGGCGCACCGCCGAA  
 GCAACGTTGGTCAGGTATTCACGGGTGGGAGGTTAGGCCTGCCCGGGGGCAGACCTGCACTCG

**Glinf003:**

CTACCTGATCCGAGGTCAACCTGGTAAAATAGAAGGTTGGAGACGCCGGCTGGCGCCCGGCCGGCCC  
 TAATCGAGCGGGTGACAAAGCCCCATACGCTCGAGGACCGGACGCGGTGCCGCCGCTGCCTTTCGGG  
 CCCGTCCCCCGGGGGGACGACGACCCAACACACAAGCCGGGCTTGAAGGGCAGCAATGACGCTCG  
 GACAGGCATGCCCCCGGAATGCCAGGGGGCGCAATGTGCGTTCAAAGACTCGATGATTCACTGAAT  
 TCTGCAATTCACATTACTTATCGCAGTTCGCTGCGTTCTTCATCGATGCCGGAACCAAGAGATCCATTG  
 TTGAAAGTTTAAATAGGTTTGCTATCAAGCTCAGACAACACTAAAGACAAGAGGTTCAATGTGGTCTC  
 CGGCGGCTACCCCCGGGGGGCGCACCGCCGAAGCAACGTTGGTCAGGTATTCACGGGTGGGAGGTT  
 AGGCCTGCCCGGGGGCAGACCTGCACTCGGTAATGATCCTTCCGCAGGTT

**Glinf004:**

GATATGCTTAAGTTCAGCGGGTATCCCTACCTGATCCGAGGTCAAAAGTTGAAAAAAGGCTTAATG  
 GATGCTAGACCTTTGCTGATAGAGAGTGCGACTTGTGCTGCGTCCGAAACCAGTAGGCCGGCTGCC  
 AATTACTTTAAGGCGAGTCTCCAGCAAAGCTAGAGACAAGACGCCAACACCAAGCAAAGCTTGAG  
 GGTACAAATGACGCTCGAACAGGCATGCCCTTTGGAATACCAAAGGGCGCAATGTGCGTTCAAAGAT  
 TCGATGATTCACTGAATTCTGCAATTCACACTACTTATCGCATTTGCTGCGTTCTTCATCGATGCCAG  
 AACCAAGAGATCCGTTGTTGAAAGTTGTAATTATTAATTTGTTACTGACGCTGATTGCAATTACAAAA  
 GGTATGTTTGTCTAGTGGTGGGCGAACCCACCAAGGAAACAAGAAGTACGCAAAAGACAAGGG  
 TGAATAATTCAGCAAGGCTGTAACCCCGAGAGGTTCCAGCCCGCCTTCATATTTGTGTAATG

**Glinf005:**

TTGATATGCTTAAGTTCAGCGGGTATCCCTACCTGATCCGAGGTCAAAAGTTGAAAAAAGGCTTAAT  
GGATGCTAGACCTTTGCTGATAGAGAGTGCGACTTGTGCTGCGCTCCGAAACCAGTAGGCCGGCTGC  
CAATTACTTTAAGGCGAGTCTCCAGCAAAGCTAGAGACAAGACGCCCAACACCAAGCAAAGCTTGA  
GGGTACAAATGACGCTCGAACAGGCATGCCCTTTGGAATACCAAAGGGCGCAATGTGCGTTCAAAGA  
TTCGATGATTCACTGAATTCTGCAATTCACACTACTTATCGCATTTTCGCTGCGTTCTTCATCGATGCCA  
GAACCAAGAGATCCGTTGTTGAAAGTTGTAATTATTAATTTGTTACTGACGCTGATTGCAATTACAAA  
AGGTTTATGTTTGTCTTGTGGTGGGCGAACCACCAAGGAAACAAGAAGTACGCAAAAGACAAGG  
GTGAATAATTCAGCAAGGCTGTAACCGCGAGAGGTTCCAGCCCGCCTTCAT

**Glinf006:**

TGATATGCTTAAGTTCAGCGGGTATCCCTACCTGATCCGAGGTCAAAAGTTGAAAAAAGGCTTAAT  
GGATGCTAGACCTTTGCTGATAGAGAGTGCGACTTGTGCTGCGCTCCGAAACCAGTAGGCCGGCTGC  
CAATTACTTTAAGGCGAGTCTCCAGCAAAGCTAGAGACAAGACGCCCAACACCAAGCAAAGCTTGA  
GGGTACAAATGACGCTCGAACAGGCATGCCCTTTGGAATACCAAAGGGCGCAATGTGCGTTCAAAGA  
TTCGATGATTCACTGAATTCTGCAATTCACACTACTTATCGCATTTTCGCTGCGTTCTTCATCGATGCCA  
GAACCAAGAGATCCGTTGTTGAAAGTTGTAATTATTAATTTGTTACTGACGCTGATTGCAATTACAAA  
AGGTTTATGGTTGTCTAGTGGTGGGCGAACCACCAAGGAAACAAGAAGTACGCAAAAGACAAGG  
GTGAATAATTCAGCAAGGCTGTAACCCCGAGAGGTTCCAGCCCGCCTTCATATTTGTGTAATGATCCC  
TCCGCAGGTTCA

**Glinf007:**

TTCCTCCCGCTTATGATATGCTTAAGTTCAGCGGGTATCCTCTACCTGATCCGAGGTCAAAAGTTGAA  
AAAAAGGCTTAATGGATGCTAGACCTTTGCTGATAGAGAGTGCGACTTGTGCTGCGCTCCGAAACCA  
GTAGGCCGGCTGCCAATTACTTTAAGGCGAGTCTCCAGCAAAGCTAGAGACAAGACGCCCAACACC  
AAGCAAAGCTTGAGGGTACAAATGACGCTCGAACAGGCATGCCCTTTGGAATACCAAAGGGCGCAA  
TGTGCGTTCAAAGATTCGATGATTCAGTGAATTCTGCAATTCACACTACTTATCGCATTTTCGCTGCGTT  
CTTCATCGATGCCAGAACCAAGAGATCCGTTGTTGAAAGTTGTAATTATTAATTTGTTACTGACGCTG  
ATTGCAATTACAAAAGGTTTATGTTTGTCTAGTGGTGGGCGAACCACCAAGGAAACAAGAAGTAC  
GCAAAAGACAAGGGTGAATAATTCAGCAAGGCTGTAACCCCGAGAGGTTCCAGCCCGCCTTCATATT  
TGTGTACATGATCCCTCCGCAGGT

**Glinf008:**

TTCCTCCGGTTTTAGATATGCTTAAGTTCAGCGGGTATCCCTACCTGATCCGAGGTCAAAAGTTGAAA  
AAAAGGCTTAATGGATGCTAGACCTTTGCTGATAGAGAGTGCGACTTGTGCTGCGCTCCGAAACCAG  
TAGGCCGGCTGCCAATTACTTTAAGGCGAGTCTCCAGCAAAGCTAGAGACAAGACGCCCAACACCA  
AGCAAAGCTTGAGGGTACAAATGACGCTCGAACAGGCATGCCCTTTGGAATACCAAAGGGCGCAAT  
GTGCGTTCAAAGATTCGATGATTCAGTGAATTCTGCAATTCACACTACTTATCGCATTTTCGCTGCGTTC  
TTCATCGATGCCAGAACCAAGAGATCCGTTGTTGAAAGTTGTAATTATTAATTTGTTACTGACGCTGAT  
TGCAATTACAAAAGGTTTATGTTTGTCTAGTGGTGGGCGAACCACCAAGGAAACAAGAAGTACGC  
AAAAGACAAGGGTGAATAATTCAGCAAGGCTGTAACCCCGAGAGGTTCCAGCCCGCCTTCATATTTG  
TGTAATGATCCCTCCGCAGGTTACCCCTACGGAAGG

**Glinf009:**

TGATATGCTTAAGTTCAGCGGGTATTCCTACCTGATCCGAGGTCAACATTCAGAAGTTGGGGGTTTAA  
CGGCTTGCCCGCGCCGCGTACCAGTTGCGAGGGTTTTACTACTACGCAATGGAAGCTGCAGCGAGAC  
CGCCACTAGATTTGCGGGCCGGCTTGCCGCAAGGGCTCGCCGATCCCCAACACCAAACCCGGGGGCT  
TGAGGGTTGAAATGACGCTCGAACAGGCATGCCC GCCAGAATACTGGCGGGCGCAATGTGCGTTCAA  
AGATTCGATGATTCACTGAATTCTGCAATTCACATTACTTATCGCATTTTGCTGCGTTCTTCATCGATGC  
CAGAACCAAGAGATCCGTTGTTGAAAGTTTTGATTTATTTATGGTTTTACTCAGAAGTTACATATAGAA  
ACAGAGTTTAGGGGTCCTCTGGCGGGCCGTCCCGTTTTACCGGGAGCGGGCTGATCCGCCGAGGCAA  
CAATTGGTATGTTACAGGGGTTTGGGAGTTGTAAACTCGGTA

**Glinf010:**

TTGATATGCTTAAGTTCAGCGGGTATTCCTACCTGATCCGAGGTCAACATTCAGAAGTTGGGGGTTTA  
ACGGCTTGCCCGCGCCGCGTACCAGTTGCGAGGGTTTTACTACTACGCAATGGAAGCTGCAGCGAGA  
CCGCCACTAGATTTGCGGGCCGGCTTGCCGCAAGGGCTCGCCGATCCCCAACACCAAACCCGGGGGCT  
TTGAGGGTTGAAATGACGCTCGAACAGGCATGCCC GCCAGAATACTGGCGGGCGCAATGTGCGTTCA  
AAGATTCGATGATTCACTGAATTCTGCAATTCACATTACTTATCGCATTTTGCTGCGTTCTTCATCGATG  
CCAGAACCAAGAGATCCGTTGTTGAAAGTTTTGATTTATTTATGGTTTTACTCAGAAGTTACATATAGA  
AACAGAGTTTAGGGGTCCTCTGGCGGGCCGTCCCGTTTTACCGGGAGCGGGCTGATCCGCCGAGGCA  
ACAATTGGTATGTTACAGGGGTTTGGGAGTTGTAAACTCGGTAATGATCCCTCCGCAGGTTT

**Glinf011:**

TGATATGCTTAAGTTCAGCGGGTATTCCTACCTGATCCGAGGTCAACATTCAGAAGTTGGGGGTTTAA  
CGGCTTGCCCGCGCCGCGTACCAGTTGCGAGGGTTTTACTACTACGCAATGGAAGCTGCAGCGAGAC  
CGCCACTAGATTTGCGGGCCGGCTTGCCGCAAGGGCTCGCCGATCCCCAACACCAAACCCGGGGGCT  
TGAGGGTTGAAATGACGCTCGAACAGGCATGCCC GCCAGAATACTGGCGGGCGCAATGTGCGTTCAA  
AGATTCGATGATTCACTGAATTCTGCAATTCACATTACTTATCGCATTTTGCTGCGTTCTTCATCGATGC  
CAGAACCAAGAGATCCGTTGTTGAAAGTTTTGATTTATTTATGGTTTTACTCAGAAGTTACATATAGAA  
ACAGAGTTTAGGGGTCCTCTGGCGGGCCGTCCCGTTTTACCGGGAGCGGGCTGATCCGCCGAGGCAA  
CAATTGGTATGTTACAGGGGTTTG

**Glinf012:**

TGATATGCTTAAGTTCAGCGGGTATTCCTACCTGATTCGAGGTCAACTTCAGAAGAGTTGGGTGTTTTA  
CGGCGTGGCCGCGCCGCTCTCCAGTCGCGAGGTGTTAGCTACTACGCGATGGAAGCTGCGGCGGGAC  
CGCCACTGTATTTGGGGGACGGCGTGTGCCACGGGGGGCTCCGCCGATCCCCAACGCCAGGCCCGG  
GGGCTGAGGGTTGTAATGACGCTCGAACAGGCATGCCC GCCAGAATACTGGCGGGCGCAATGTGCG  
TTCAAAGATTCGATGATTCACTGAATTCTGCAATTCACATTACTTATCGCATTTGCTGCGTTCTTCATC  
GATGCCAGAGCCAAGAGATCCGTTGTTGAAAGTTTTAATTTATTTGCTTGTTTTACTCAGAAGAAACAT  
TATAGAAACAGAGTTAGGGGTCCTCTGGCGGGGGCGGCCGTTTACGGGGCCGTCTGTTCCCGCCG  
AAGCAACGTTTAGGTATGTTACAGGGGTTGATGAGTTGAATAACTCGG

**Glinf013:**

TTCCTCCGCTTATTGATATGCTTAAGTTCAGCGGGTATTCCCTACCTGATCCGAGGTCAACATTGAGAAG  
 TTGGGGGTTTAACGGCTTGGCCGCGCCGCTACCAGTTGCGAGGGTTTACTACTACGCAATGGAAGC  
 TGCAGCGAGACCGCCACTAGATTTGCGGGCCGGCTTGCCGCAAGGGCTCGCCGATCCCCAACACCAA  
 ACCCGGGGGCTTGAGGGTTGAAATGACGCTCGAACAGGCATGCCCCGCCAGAATACTGGCGGGGCGCA  
 ATGTGCGTTCAAAGATTGATGATTCACTGAATTCTGCAATTCACATTACTTATCGCATTTTGCTGCGT  
 TCTTCATCGATGCCAGAACCAAGAGATCCGTTGTTGAAAGTTTTGATTTATTTATGGTTTTACTCAGAA  
 GTTACATATAGAAACAGAGTTTAGGGGTCCTCTGGCGGGCCGTCCTCGTTTACCAGGGAGCGGGCTGAT  
 CCGCCGAGGCAACAATTGGTATGTTACAGGGGTTTGGGAGTTGTAACTCAGGTAATGATCCCTCCG  
 CAGGTTACCTACGGA

#### Glinf014:

TTCCTCCGCTTTATGATATGCTTAAGTTCAGCGGGTAGTCCCTACCTGATCCGAGGTCAACCTGAGA  
 AAATATAAAGTTGGGGTTCGGCTGGCGCCGGCCGGGCTACAAGAGCGGGTGACGAAGCCCCATA  
 CGCTCGAGGACCGGACGCGGTGCCGCCGCTGCCTTTCGGGCCCCGTCCCCCGGCGCGGGGGGACGG  
 GGCCCAACACACAAGCCGTGCTTGAGGGCAGCAATGACGCTCGGACAGGCATGCCCTCCGGAATAC  
 CAGAGGGCGCAATGTGCGTTCAAAGACTCGATGATTCACTGAATTCTGCAATTCACATTAGTTATCGC  
 ATTTGCTGCGTTCTTCATCGATGCCGGAACCAAGAGATCCGTTGTTGAAAGTTTAACTAATTTAGCT  
 AGTTTCTCAGACTGCAACTTCAGACAGCGTTCAGAGGGGGGCTTCGGCGGGCGCGGGCCCCGGGGGCG  
 GATCCCCCGGGCGGCTAGGCGGGCGGGCCCCGCGGAAGCAACACAGGTTTCGTGCAACACGGGTGGG  
 AGGTTGGACCCAGAGGGTTACCCTCACTCGGTAACCTGATCCTTCCGCAGGTTT

#### Glinf015:

TTCCTCCGGCCTTATTGATATGCTTAAGTTCAGCGGGTATCCCTACCTGATCCGAGGTCAACCTGAAA  
 AAAATGGGGTTGAGGGTTCGGCCAGCGCCGGCCGGGCTACAGAGCGGGTGACAAAGCCCCATACG  
 CTCGAGGACCGGACACGGTGCCGCCGCTGCCTTTCGGGCCCCGTCCCCGGGGGGGAGGACGGAGGC  
 CCAACACACAAGCCGTGCTTGAGGGCAGCAATGACGCTCGGACAGGCATGCCCCCGGAATACCAG  
 GGGGCGCAATGTGCGTTCAAAGACTCGATGATTCACTGAATTCTGCAATTCACATTAGTTATCGCATT  
 TCGCTGCGTTCTTCATCGATGCCGGAACCAAGAGATCCGTTGTTGAAAGTTTTAAATAATTTTTGCTTA  
 TCGCTCAGACTGCAATCTTCAGACAGCGTTCAGAGGGGGCTTCGGCGGGCGCGGGCCCCGGGGCAGA  
 TGCCCCCGGGCGCCGTGAGGCGGGCTCGCCGAAGCAACATGGTACAAGAGACACGGGTGGGAGGT  
 TGGACCCAGAGGGCATACGCTCACTCAGTAGATGATCCTTCCGCAGGTTT

#### Glinf016:

CAGAGTAAAAAATAAGGCTTCTGGATGCCCATGCCCCGGTAGAGAGTACGCAATGTGCTGCGCTCAA  
 AGCCGGATTACATGGCTGCCAATTGCTTTAAGGCGAGTCCACGCGCAATGGCGGGACAAACACCCAA  
 CACCAAGCAGAGCTTGAGGGTTCAAATGACGCTCGAACAGGCATGCCCCATGGAATACCAAGGGGC  
 GCAATGTGCGTTCAAAGATACAATGATTCACTGAATTCTGCAATTCACACTACTTATCGCATTTGCTG  
 CGTTCTTCATCCATGCCAGAACCAAGAGATCCATTGTTGAAAGTTTTAATAATTAACCTATTATCAGAC  
 GCTGACTGCTATTACAAAAAGGTTTGATAAAGGGTCCTAGCGGGGGGCAAGCCCCCGAGGAAACA  
 AGGGGTACGCGTAGACATAGGTAGAAAACGGTTTTTTACACCGAAATCGTTAATGATCCTTCCGCA

#### Glinf017:

GATATGCTTAAGTTCAGCGGGTAGTCCTACCTGATTTGAGGTCAAGAGTCATAATGTTTGACAAGCAA  
 ACAGTCTGAGTTAACAGACAGTTAGAACGATAACGTTATAATGATTTCCATTGACCAAGACGTAGAT  
 AATTATCACATCAAGGAACAGTTATCTAGTTACTGCTAATACTTTTAAGAGGAGCTGACTTCTTTTAC  
 AGATGCCCGCAGCCTCCAAGTCCAAGCCTACTAACATCAGTCGCAAAACCGAGTAGAGGTTGAGAAT  
 TTAATGACACTCAAACAGGCATGCTCTTCGGAATACCAAAGAGCGCAAGGTGCGTTCAAAGATTCTGA  
 TGATTCACTGAATTCTGCAATTCACATTACTTATCGCATTTTCGCTGCGTTCTTCATCGATGCGAGAGCC  
 AAGAGATCCGTTGCTAAAAGTTGTATATTATTTAGAGGTCTATTACAACCAGTAAACAAACATTCAAT  
 GTGTTATAAAGTGTGTATGAAACATAGACCTGAGAATATGTAGAAGCAAGCACTTGCGTGCAAGCTT  
 CAAATCCGCTTGTTAAGGCGAGAGTCTATTACGGTCTACAAATGTGCACAGGTGGAAAGGTAAGAA  
 AGCGCAGAAGGTAAGCACTTGCTCAGAGAGACCAGCTCAACCAACTACATTTTA

#### Glinf018:

TTCTCCGCCTTATTGATATGCTTAAGTTCACTGACGGGTATTCTACCTGATCTGAGGTCAACCTTGA  
 GAAGTGGGGGGTTTAACGGCGTGTTCAACCGCTATCCTGCCGCGAGAGGTTTAATTACTGCACGG  
 AGGAGTTCGCGAGGGAACCGCCACTGGATTTACGGGCCAGCCGCCAGGGGCAGGCTGATCCCC  
 AACGCCAGGTCCCGCGAACGGGTCTGAGGGTTGAAATGACGCTCAGACAGGCATGCCCGCCAGAA  
 TACTGGCGGGCGCAATGTGCGTTCAAAGATTCTGATGATTCACTGAATTCTGCAATTCACATTACTTATC  
 GCATTTTGCTGCGTTCTTCATCGATGCCAGAACCAAGAGATCCGTTGCTGAAAGTTTTGATTTATTGCT  
 TTATGCCACTCAGAAATACACTAAAAGACAAGAGTTTGGAGCCTCCGGCGGACGCTGGGTCCGGGC  
 CGCGCGAACCGCGCCCGGGGCGAGGCCGCCGAAGCAACAGTGGTAGGTTACAATGGTTTGGGAGTTT  
 TTACACTCGGTAATGATCCCTCCGCAGGTTACCCCTACGGA

#### Glinf019:

TTGATATGCTTAAGTTCAGCGGGTCTTCCTACCTGATCCGAGGTCAACCTTGGGTAAAAAAGGCTTTTT  
 AACGGCCGGAACCCGAGCAGCCCTGAGCGAGATAAAATCTACTACGCCCGGTGTGACAGCGAGC  
 CCGCCACTGGTTTTTCAGGGCCTGCGGCAGCCGAGGTCCCCAACACAAGCCTGGGGCTTGATGGTTG  
 AAATGACGCTCGAACAGGCATGCCCGCCAGAATACTGGCGGGCGCAATGTGCGTTCAAAGATTCTGAT  
 GATTCACTGAATTCTGCAATTCACATTACTTATCGCATTTTCGCTGCGTTCTTCATCGATGCCAGAACCA  
 AGAGATCCGTTGTTGAAAGTTTTGACTTATTCAGTACAGAAGACTCAGAGAGGCCATAATGTATCAA  
 GAGTTGGGTTTCTCCGGCGGGCGCCCCGCGAGGGGGCCAGGGGGCACCAGGGCGGACCCGGGCCGC  
 CCGCCGAAGCAACGGTTTGAAGGTAACGTTACAATGGTTTGGGAGTTTTGCAA

#### Glinf020:

TGATATGCTTAAGTTCAGCGGGTATTCCTACCTGATTCGAGGTCAACTTCAGAAGAGTTGGGTGTTTTA  
 CGGCGTGGCCGCGCCGCTCTCCAGTCGCGAGGTGTTAGCTACTACGCGATGGAAGCTGCGGCGGGAC  
 CGCCACTGTATTTGGGGGACGGCGTGTGCCACGGGGGGCTCCGCCGATCCCCAACGCCAGGCCCGG  
 GGGCTGAGGGTTGTAATGACGCTCGAACAGGCATGCCCGCCAGAATACTGGCGGGCGCAATGTGCG  
 TTCAAAGATTCTGATGATTCACTGAATTCTGCAATTCACATTACTTATCGCATTTTCGCTGCGTTCTTCATC  
 GATGCCAGAGCCAAGAGATCCGTTGTTGAAAGTTTTAATTTATTTGCTTGTTTTACTCAGAAGAAACAT  
 TATAGAAACAGAGTTAGGGGTCTCTGGCGGGGGCGGCCGTTTACGGGGCCGTCTGTTCCCGCCG  
 AAGCAACGTTTAGGTATGTTACAGGGTTGATGAGTTGAATAACTCGGGGCTAATGATCCCTCCGCAG  
 GTTACACCTACG

#### Glinf021:



TACCTTGC GTTGCCTCGGCAGGCCGCGTCGTACCTCGCAGTGCCCTTTACGCTGTAAAGGCCTGCTTGG  
 CGGGCGCGGGTCACCCCTGCCGGCGGCTTATAAACTCTGTTTTAGCATTGTACTTCTGAACACATAAC  
 TAAATCAGTTAAACTTTCAACAACGGATCTCTTGGTTCTGGCATCGATGAAGAACGCAGCGAAATG  
 CGATAAGTAATGTGAATTGCAGAATTCAGTGAATCATCGAATCTTTGAACGCACATTGCGCCCATAG  
 TATTCTAGTGGGCATGCCTGTTTCGAGCGTCATTTCAACCCTTAAGCCCTCGTTGCTTAGTGTTGGGAGC  
 CTACGGCCTGCCGTAGCTCCCCAAAGTTAGTGGCGGGGTCGGTTCGCACTCTAGACGTAGTAGATTTT  
 ATCCATCTCGCCTGTAGTGTGTGCCGGTCCTCTGCCGTAAAACCCCATATATCAAAGGTTGACCTCG  
 GATCAGGTAGGAATACC

#### Glinf022:

CCCTCCTCCGGCTTATGATATGCTTAAGTTCAGCGGGTATTCCTACCTGATCCGAGGTCAACCTTG GTA  
 AAAGTTTGGGGTTTTACGGCGTGCGCGCGCCCTTCCGCCCCGCGAGGTTTGTGCTACTACGCGGAGG  
 AGGCAGCGGCGAGGCCGCCACTGGGTTTCGGGGACAGGCGCCCTTGGAGGACGCCTGGGCCCCAAC  
 GCCGGGCCCCGCCCTCCCCCGCGAGGGGAAAAGGGGGGGGCCCGAGGGTTGAAATGACGCTCGGA  
 CAGGCATGCCCCGCCAGAATACTGGCGGGCGCAATGTGCGTTCAAAGATTCGATGATTCACTGAATTCT  
 GCAATTCACATTACTTATCGCATTTGCTGCGTTCTTCATCGATGCCAGAACCAAGAGATCCGTTGTTG  
 AAAGTTTGGATTGTTTGTGCTTTCGGCTCGCTCAGAGGATACACATGTTTGTAAACAGGGTTCGT  
 GTGGTCCCCGGCGGGCGCCTTGGGTCCGGGGCACGCAGCGCCCGGGGCGGTCCGCCGAAGCAACGG  
 TAGGTAAGGTTACAAAGGGTTGGGAGTTGTTTGTAACTCCCCTATAATGATCCCTCCGCAGGTTCA  
 CCCCTACGGAG

**Figure S2.** The ITS1-5.8S-ITS2 partial sequences of 22 fungal isolates (i.e., Glinf001-Glinf022).

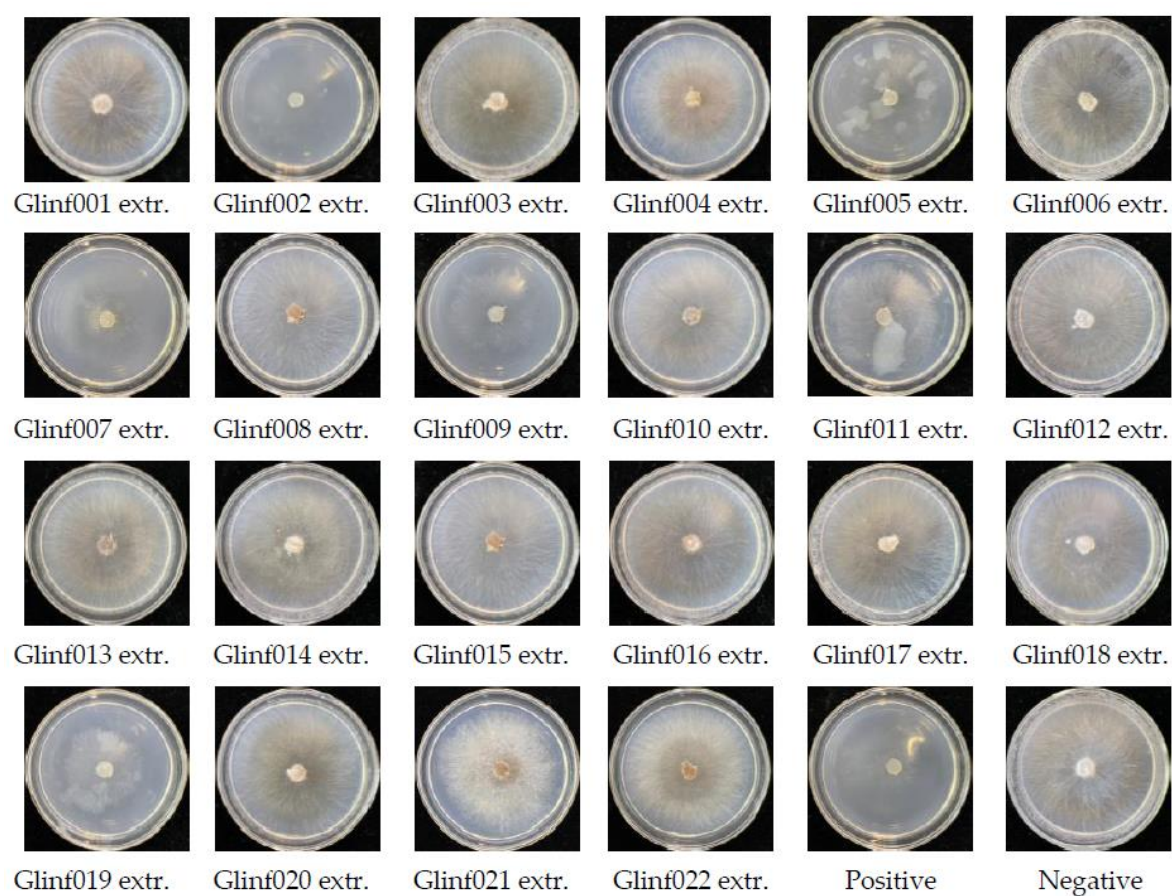

**Figure S3.** Mycelial growth inhibition of the ethyl acetate extracts from 22 endophytic fungal strains on *Rhizoctonia solani*. The word “extract” was abbreviated as “extr.”. The concentration of each extract in the medium was 100 µg/mL. The positive control was carbendazim with the concentration in medium was 100 µg/mL. The negative control was DMSO with its concentration in medium was 0.7 µL/mL.

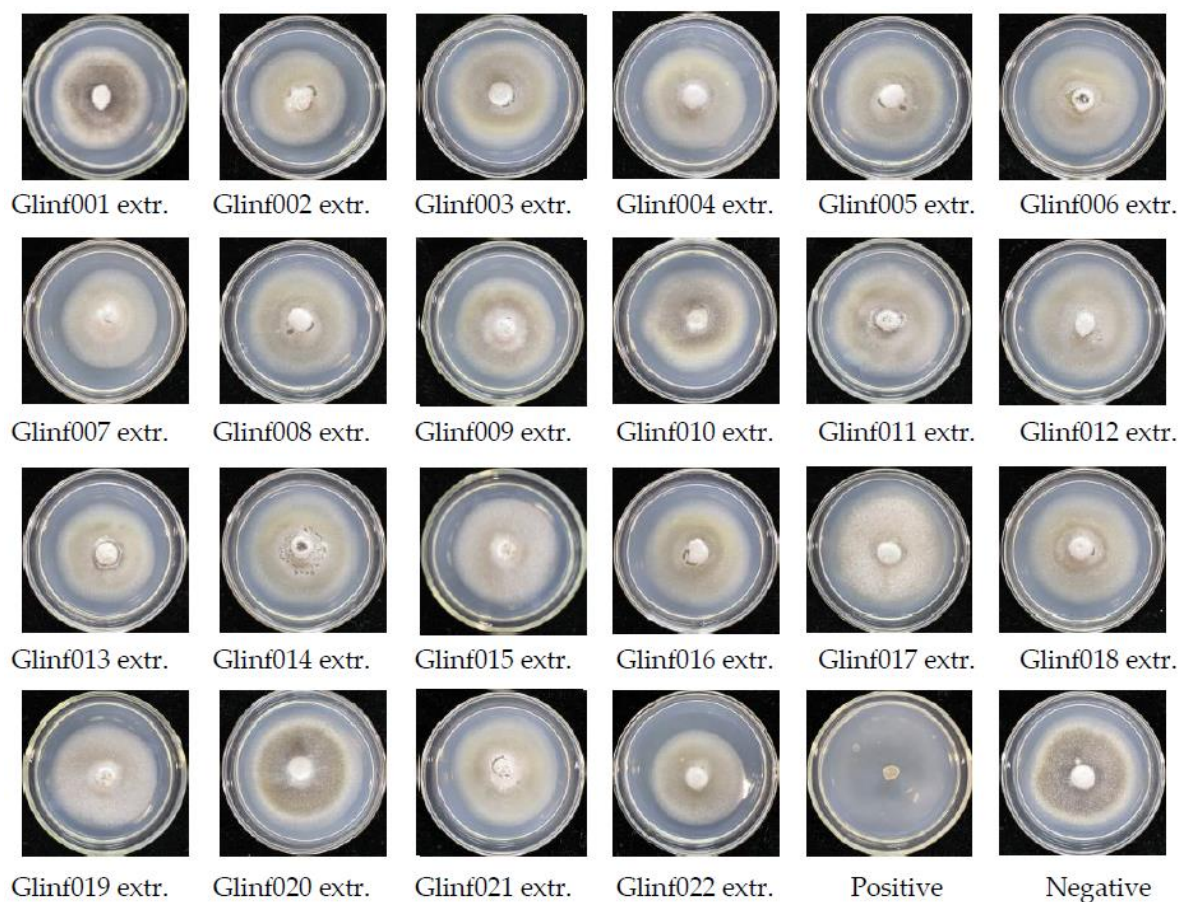

**Figure S4.** Mycelial growth inhibition of the ethyl acetate extracts from 22 endophytic fungal strains on *Magnaporthe oryzae*. The word “extract” was abbreviated as “extr.”. The concentration of each extract in the medium was 100 µg/mL. The positive control was carbendazim with the concentration in medium was 100 µg/mL. The negative control was DMSO with its concentration in medium was 0.7 µL/mL.

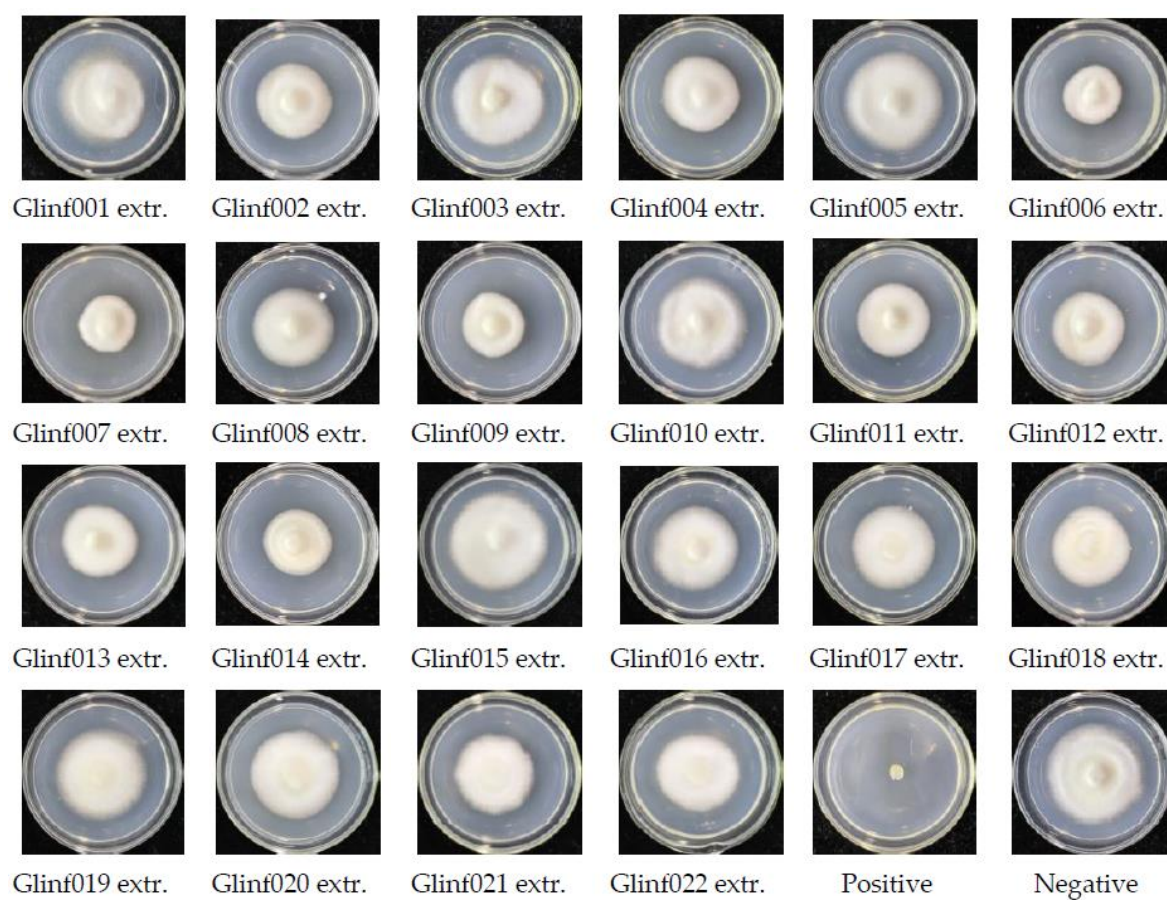

**Figure S5.** Mycelial growth inhibition of the ethyl acetate extracts from 22 endophytic fungal strains on *Ustilaginoidea virens* strain P1. The word “extract” was abbreviated as “extr.”. The concentration of each extract in the medium was 100 µg/mL. The positive control was carbendazim with the concentration in medium was 100 µg/mL. The negative control was DMSO with its concentration in medium was 0.7 µL/mL.



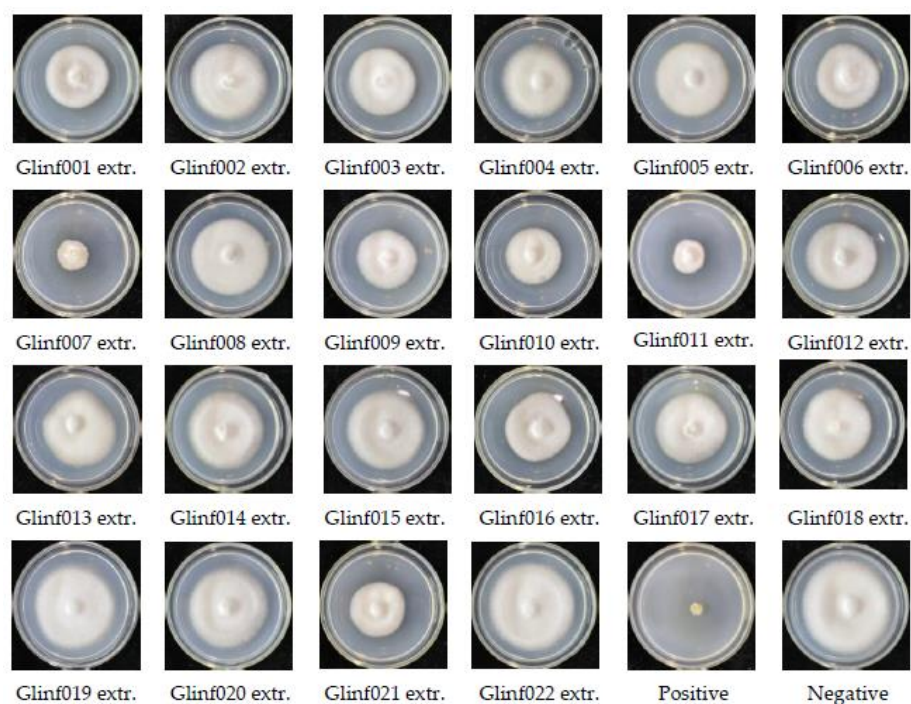

**Figure S6.** Mycelial growth inhibition of the ethyl acetate extracts from 22 endophytic fungal strains on *Ustilaginoidea virens* strain LN02. The word “extract” was abbreviated as “extr.”. The concentration of each extract in the medium was 100 µg/mL. The positive control was carbendazim with the concentration in medium was 100 µg/mL. The negative control was DMSO with its concentration in medium was 0.7 µL/mL.

| Isolate  | Colony morphology                                                                   | Mycelium                                                                             | Spore and conidiophore                                                                |
|----------|-------------------------------------------------------------------------------------|--------------------------------------------------------------------------------------|---------------------------------------------------------------------------------------|
| Glinf001 | 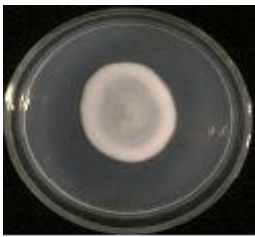   |    |    |
| Glinf002 |    |    |    |
| Glinf003 |   |   |   |
| Glinf004 |  |  |  |
| Glinf005 |  |  |  |
| Glinf006 |  |  |  |



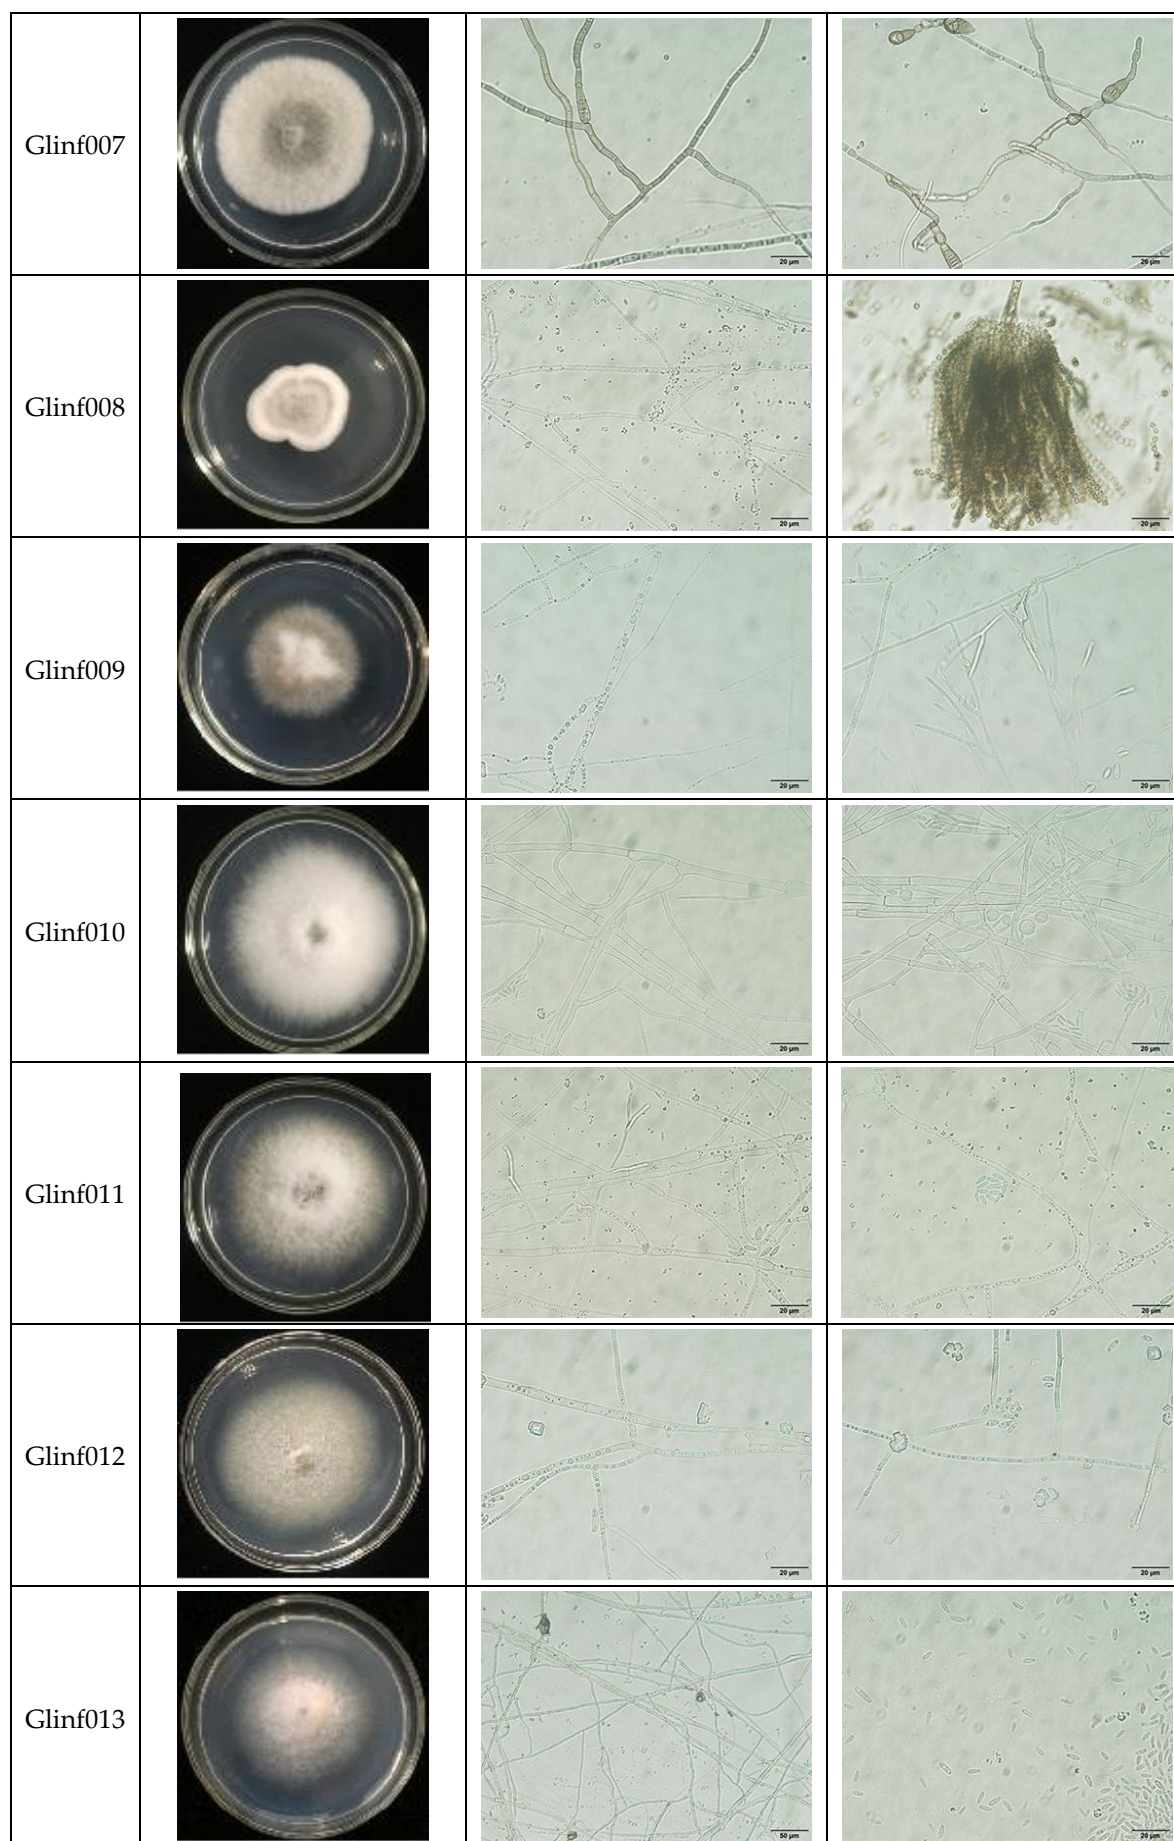

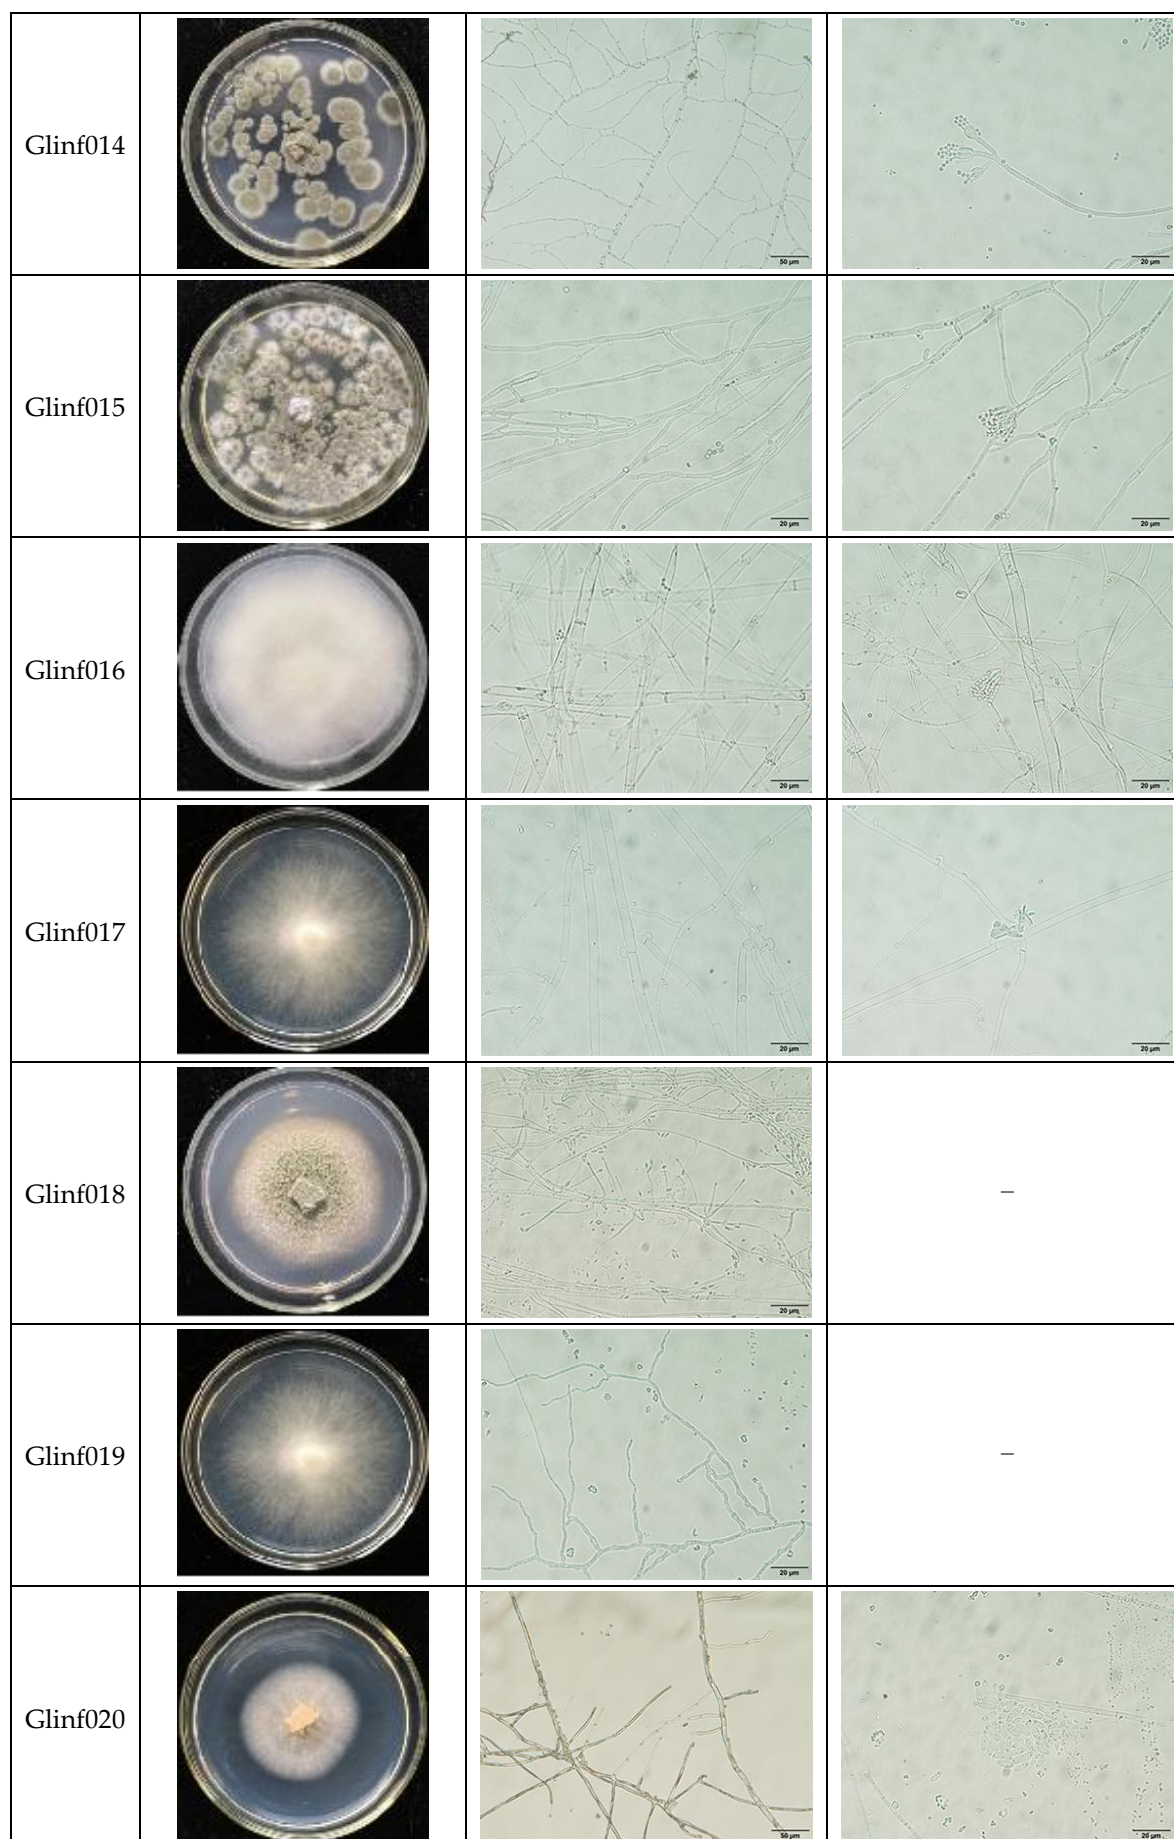



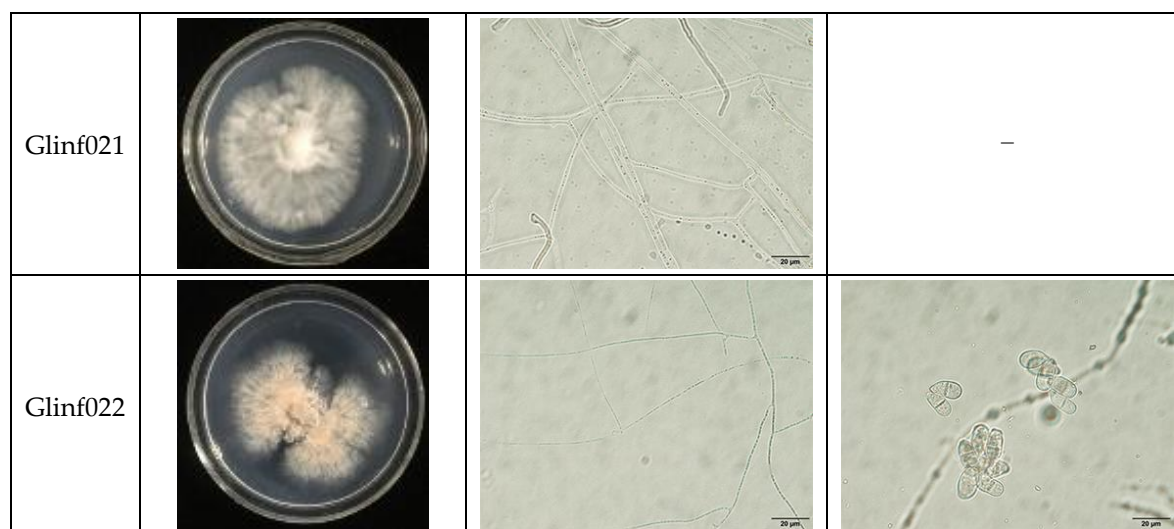

**Figure S7.** Morphological characteristics of 22 endophytic fungal isolates from the roots of *Glycyrrhiza inflata*.

**Table S1.** One-way ANOVA method was employed for statistical analysis of the inhibitions of 23 treatments on the pathogen *Rhizoctonia solani*. Nos. 1-22 were EtOAc extracts of endophytes and No. 23 was the positive control carbendazim.

| Descriptives |    |          |                |            |                                  |             |
|--------------|----|----------|----------------|------------|----------------------------------|-------------|
| Inhibition   |    |          |                |            |                                  |             |
|              | N  | Mean     | Std. Deviation | Std. Error | 95% Confidence Interval for Mean |             |
|              |    |          |                |            | Lower Bound                      | Upper Bound |
| 1            | 3  | 0.005900 | 0.0000000      | 0.0000000  | 0.005900                         | 0.005900    |
| 2            | 3  | 0.807600 | 0.0604684      | 0.0349115  | 0.657388                         | 0.957812    |
| 3            | 3  | 0.005900 | 0.0000000      | 0.0000000  | 0.005900                         | 0.005900    |
| 4            | 3  | 0.097100 | 0.0358535      | 0.0207000  | 0.008035                         | 0.186165    |
| 5            | 3  | 0.360567 | 0.0177500      | 0.0102480  | 0.316473                         | 0.404660    |
| 6            | 3  | 0.005300 | 0.0000000      | 0.0000000  | 0.005300                         | 0.005300    |
| 7            | 3  | 0.693000 | 0.0146000      | 0.0084293  | 0.656732                         | 0.729268    |
| 8            | 3  | 0.005900 | 0.0000000      | 0.0000000  | 0.005900                         | 0.005900    |
| 9            | 3  | 0.585800 | 0.0146000      | 0.0084293  | 0.549532                         | 0.622068    |
| 10           | 3  | 0.005300 | 0.0000000      | 0.0000000  | 0.005300                         | 0.005300    |
| 11           | 3  | 0.314533 | 0.0718774      | 0.0414984  | 0.135980                         | 0.493087    |
| 12           | 3  | 0.064300 | 0.0675500      | 0.0390000  | −0.103503                        | 0.232103    |
| 13           | 3  | 0.005900 | 0.0000000      | 0.0000000  | 0.005900                         | 0.005900    |
| 14           | 3  | 0.028567 | 0.0056580      | 0.0032667  | 0.014511                         | 0.042622    |
| 15           | 3  | 0.005900 | 0.0000000      | 0.0000000  | 0.005900                         | 0.005900    |
| 16           | 3  | 0.005900 | 0.0000000      | 0.0000000  | 0.005900                         | 0.005900    |
| 17           | 3  | 0.005900 | 0.0000000      | 0.0000000  | 0.005900                         | 0.005900    |
| 18           | 3  | 0.025300 | 0.0000000      | 0.0000000  | 0.025300                         | 0.025300    |
| 19           | 3  | 0.463933 | 0.0292500      | 0.0168875  | 0.391272                         | 0.536594    |
| 20           | 3  | 0.005900 | 0.0000000      | 0.0000000  | 0.005900                         | 0.005900    |
| 21           | 3  | 0.301500 | 0.0817266      | 0.0471849  | 0.098480                         | 0.504520    |
| 22           | 3  | 0.116333 | 0.0313522      | 0.0181012  | 0.038450                         | 0.194217    |
| 23           | 3  | 0.780000 | 0.0000000      | 0.0000000  | 0.780000                         | 0.780000    |
| Total        | 69 | 0.204188 | 0.2742661      | 0.0330178  | 0.138302                         | 0.270074    |

| Descriptives |         |         |
|--------------|---------|---------|
| Inhibition   |         |         |
|              | Minimum | Maximum |
| 1            | 0.0059  | 0.0059  |
| 2            | 0.7602  | 0.8757  |
| 3            | 0.0059  | 0.0059  |
| 4            | 0.0764  | 0.1385  |

|       |        |        |
|-------|--------|--------|
| 5     | 0.3428 | 0.3783 |
| 6     | 0.0053 | 0.0053 |
| 7     | 0.6784 | 0.7076 |
| 8     | 0.0059 | 0.0059 |
| 9     | 0.5712 | 0.6004 |
| 10    | 0.0053 | 0.0053 |
| 11    | 0.2593 | 0.3958 |
| 12    | 0.0253 | 0.1423 |
| 13    | 0.0059 | 0.0059 |
| 14    | 0.0253 | 0.0351 |
| 15    | 0.0059 | 0.0059 |
| 16    | 0.0059 | 0.0059 |
| 17    | 0.0059 | 0.0059 |
| 18    | 0.0253 | 0.0253 |
| 19    | 0.4347 | 0.4932 |
| 20    | 0.0059 | 0.0059 |
| 21    | 0.2495 | 0.3957 |
| 22    | 0.0936 | 0.1521 |
| 23    | 0.7800 | 0.7800 |
| Total | 0.0053 | 0.8757 |

### Test of Homogeneity of Variances

|            |                                      | Levene Statistic | df1 | df2   | Sig.  |
|------------|--------------------------------------|------------------|-----|-------|-------|
| Inhibition | Based on Mean                        | 8.493            | 22  | 46    | 0.000 |
|            | Based on Median                      | 1.027            | 22  | 46    | 0.454 |
|            | Based on Median and with adjusted df | 1.027            | 22  | 9.239 | 0.512 |
|            | Based on trimmed mean                | 7.312            | 22  | 46    | 0.000 |

### ANOVA

| Inhibition     |                |    |             |         |       |
|----------------|----------------|----|-------------|---------|-------|
|                | Sum of Squares | df | Mean Square | F       | Sig.  |
| Between Groups | 5.067          | 22 | 0.230       | 221.075 | 0.000 |
| Within Groups  | 0.048          | 46 | 0.001       |         |       |
| Total          | 5.115          | 68 |             |         |       |

## Post Hoc Tests

## Multiple Comparisons

Dependent Variable: Inhibition

LSD

| (I) Strains | (J) Strains | Mean Difference |            | Sig.  | 95% Confidence Interval |             |
|-------------|-------------|-----------------|------------|-------|-------------------------|-------------|
|             |             | (I-J)           | Std. Error |       | Lower Bound             | Upper Bound |
| 1           | 2           | −0.8017000*     | 0.0263546  | 0.000 | −0.854749               | −0.748651   |
|             | 3           | 0.0000000       | 0.0263546  | 1.000 | −0.053049               | 0.053049    |
|             | 4           | −0.0912000*     | 0.0263546  | 0.001 | −0.144249               | −0.038151   |
|             | 5           | −0.3546667*     | 0.0263546  | 0.000 | −0.407716               | −0.301618   |
|             | 6           | 0.0006000       | 0.0263546  | 0.982 | −0.052449               | 0.053649    |
|             | 7           | −0.6871000*     | 0.0263546  | 0.000 | −0.740149               | −0.634051   |
|             | 8           | 0.0000000       | 0.0263546  | 1.000 | −0.053049               | 0.053049    |
|             | 9           | −0.5799000*     | 0.0263546  | 0.000 | −0.632949               | −0.526851   |
|             | 10          | 0.0006000       | 0.0263546  | 0.982 | −0.052449               | 0.053649    |
|             | 11          | −0.3086333*     | 0.0263546  | 0.000 | −0.361682               | −0.255584   |
|             | 12          | −0.0584000*     | 0.0263546  | 0.032 | −0.111449               | −0.005351   |
|             | 13          | 0.0000000       | 0.0263546  | 1.000 | −0.053049               | 0.053049    |
|             | 14          | −0.0226667      | 0.0263546  | 0.394 | −0.075716               | 0.030382    |
|             | 15          | 0.0000000       | 0.0263546  | 1.000 | −0.053049               | 0.053049    |
|             | 16          | 0.0000000       | 0.0263546  | 1.000 | −0.053049               | 0.053049    |
|             | 17          | 0.0000000       | 0.0263546  | 1.000 | −0.053049               | 0.053049    |
|             | 18          | −0.0194000      | 0.0263546  | 0.465 | −0.072449               | 0.033649    |
|             | 19          | −0.4580333*     | 0.0263546  | 0.000 | −0.511082               | −0.404984   |
|             | 20          | 0.0000000       | 0.0263546  | 1.000 | −0.053049               | 0.053049    |
|             | 21          | −0.2956000*     | 0.0263546  | 0.000 | −0.348649               | −0.242551   |
|             | 22          | −0.1104333*     | 0.0263546  | 0.000 | −0.163482               | −0.057384   |
|             | 23          | −0.7741000*     | 0.0263546  | 0.000 | −0.827149               | −0.721051   |
| 2           | 1           | 0.8017000*      | 0.0263546  | 0.000 | 0.748651                | 0.854749    |
|             | 3           | 0.8017000*      | 0.0263546  | 0.000 | 0.748651                | 0.854749    |
|             | 4           | 0.7105000*      | 0.0263546  | 0.000 | 0.657451                | 0.763549    |
|             | 5           | 0.4470333*      | 0.0263546  | 0.000 | 0.393984                | 0.500082    |
|             | 6           | 0.8023000*      | 0.0263546  | 0.000 | 0.749251                | 0.855349    |
|             | 7           | 0.1146000*      | 0.0263546  | 0.000 | 0.061551                | 0.167649    |
|             | 8           | 0.8017000*      | 0.0263546  | 0.000 | 0.748651                | 0.854749    |
|             | 9           | 0.2218000*      | 0.0263546  | 0.000 | 0.168751                | 0.274849    |
|             | 10          | 0.8023000*      | 0.0263546  | 0.000 | 0.749251                | 0.855349    |
|             | 11          | 0.4930667*      | 0.0263546  | 0.000 | 0.440018                | 0.546116    |
|             | 12          | 0.7433000*      | 0.0263546  | 0.000 | 0.690251                | 0.796349    |

|   |    |             |           |       |           |           |
|---|----|-------------|-----------|-------|-----------|-----------|
|   | 13 | 0.8017000*  | 0.0263546 | 0.000 | 0.748651  | 0.854749  |
|   | 14 | 0.7790333*  | 0.0263546 | 0.000 | 0.725984  | 0.832082  |
|   | 15 | 0.8017000*  | 0.0263546 | 0.000 | 0.748651  | 0.854749  |
|   | 16 | 0.8017000*  | 0.0263546 | 0.000 | 0.748651  | 0.854749  |
|   | 17 | 0.8017000*  | 0.0263546 | 0.000 | 0.748651  | 0.854749  |
|   | 18 | 0.7823000*  | 0.0263546 | 0.000 | 0.729251  | 0.835349  |
|   | 19 | 0.3436667*  | 0.0263546 | 0.000 | 0.290618  | 0.396716  |
|   | 20 | 0.8017000*  | 0.0263546 | 0.000 | 0.748651  | 0.854749  |
|   | 21 | 0.5061000*  | 0.0263546 | 0.000 | 0.453051  | 0.559149  |
|   | 22 | 0.6912667*  | 0.0263546 | 0.000 | 0.638218  | 0.744316  |
|   | 23 | 0.0276000   | 0.0263546 | 0.300 | −0.025449 | 0.080649  |
| 3 | 1  | 0.0000000   | 0.0263546 | 1.000 | −0.053049 | 0.053049  |
|   | 2  | −0.8017000* | 0.0263546 | 0.000 | −0.854749 | −0.748651 |
|   | 4  | −0.0912000* | 0.0263546 | 0.001 | −0.144249 | −0.038151 |
|   | 5  | −0.3546667* | 0.0263546 | 0.000 | −0.407716 | −0.301618 |
|   | 6  | 0.0006000   | 0.0263546 | 0.982 | −0.052449 | 0.053649  |
|   | 7  | −0.6871000* | 0.0263546 | 0.000 | −0.740149 | −0.634051 |
|   | 8  | 0.0000000   | 0.0263546 | 1.000 | −0.053049 | 0.053049  |
|   | 9  | −0.5799000* | 0.0263546 | 0.000 | −0.632949 | −0.526851 |
|   | 10 | 0.0006000   | 0.0263546 | 0.982 | −0.052449 | 0.053649  |
|   | 11 | −0.3086333* | 0.0263546 | 0.000 | −0.361682 | −0.255584 |
|   | 12 | −0.0584000* | 0.0263546 | 0.032 | −0.111449 | −0.005351 |
|   | 13 | 0.0000000   | 0.0263546 | 1.000 | −0.053049 | 0.053049  |
|   | 14 | −0.0226667  | 0.0263546 | 0.394 | −0.075716 | 0.030382  |
|   | 15 | 0.0000000   | 0.0263546 | 1.000 | −0.053049 | 0.053049  |
|   | 16 | 0.0000000   | 0.0263546 | 1.000 | −0.053049 | 0.053049  |
|   | 17 | 0.0000000   | 0.0263546 | 1.000 | −0.053049 | 0.053049  |
|   | 18 | −0.0194000  | 0.0263546 | 0.465 | −0.072449 | 0.033649  |
|   | 19 | −0.4580333* | 0.0263546 | 0.000 | −0.511082 | −0.404984 |
|   | 20 | 0.0000000   | 0.0263546 | 1.000 | −0.053049 | 0.053049  |
|   | 21 | −0.2956000* | 0.0263546 | 0.000 | −0.348649 | −0.242551 |
|   | 22 | −0.1104333* | 0.0263546 | 0.000 | −0.163482 | −0.057384 |
|   | 23 | −0.7741000* | 0.0263546 | 0.000 | −0.827149 | −0.721051 |
| 4 | 1  | 0.0912000*  | 0.0263546 | 0.001 | 0.038151  | 0.144249  |
|   | 2  | −0.7105000* | 0.0263546 | 0.000 | −0.763549 | −0.657451 |
|   | 3  | 0.0912000*  | 0.0263546 | 0.001 | 0.038151  | 0.144249  |
|   | 5  | −0.2634667* | 0.0263546 | 0.000 | −0.316516 | −0.210418 |
|   | 6  | 0.0918000*  | 0.0263546 | 0.001 | 0.038751  | 0.144849  |
|   | 7  | −0.5959000* | 0.0263546 | 0.000 | −0.648949 | −0.542851 |
|   | 8  | 0.0912000*  | 0.0263546 | 0.001 | 0.038151  | 0.144249  |
|   | 9  | −0.4887000* | 0.0263546 | 0.000 | −0.541749 | −0.435651 |

|   |    |             |           |       |           |           |
|---|----|-------------|-----------|-------|-----------|-----------|
|   | 10 | 0.0918000*  | 0.0263546 | 0.001 | 0.038751  | 0.144849  |
|   | 11 | −0.2174333* | 0.0263546 | 0.000 | −0.270482 | −0.164384 |
|   | 12 | 0.0328000   | 0.0263546 | 0.220 | −0.020249 | 0.085849  |
|   | 13 | 0.0912000*  | 0.0263546 | 0.001 | 0.038151  | 0.144249  |
|   | 14 | 0.0685333*  | 0.0263546 | 0.012 | 0.015484  | 0.121582  |
|   | 15 | 0.0912000*  | 0.0263546 | 0.001 | 0.038151  | 0.144249  |
|   | 16 | 0.0912000*  | 0.0263546 | 0.001 | 0.038151  | 0.144249  |
|   | 17 | 0.0912000*  | 0.0263546 | 0.001 | 0.038151  | 0.144249  |
|   | 18 | 0.0718000*  | 0.0263546 | 0.009 | 0.018751  | 0.124849  |
|   | 19 | −0.3668333* | 0.0263546 | 0.000 | −0.419882 | −0.313784 |
|   | 20 | 0.0912000*  | 0.0263546 | 0.001 | 0.038151  | 0.144249  |
|   | 21 | −0.2044000* | 0.0263546 | 0.000 | −0.257449 | −0.151351 |
|   | 22 | −0.0192333  | 0.0263546 | 0.469 | −0.072282 | 0.033816  |
|   | 23 | −0.6829000* | 0.0263546 | 0.000 | −0.735949 | −0.629851 |
| 5 | 1  | 0.3546667*  | 0.0263546 | 0.000 | 0.301618  | 0.407716  |
|   | 2  | −0.4470333* | 0.0263546 | 0.000 | −0.500082 | −0.393984 |
|   | 3  | 0.3546667*  | 0.0263546 | 0.000 | 0.301618  | 0.407716  |
|   | 4  | 0.2634667*  | 0.0263546 | 0.000 | 0.210418  | 0.316516  |
|   | 6  | 0.3552667*  | 0.0263546 | 0.000 | 0.302218  | 0.408316  |
|   | 7  | −0.3324333* | 0.0263546 | 0.000 | −0.385482 | −0.279384 |
|   | 8  | 0.3546667*  | 0.0263546 | 0.000 | 0.301618  | 0.407716  |
|   | 9  | −0.2252333* | 0.0263546 | 0.000 | −0.278282 | −0.172184 |
|   | 10 | 0.3552667*  | 0.0263546 | 0.000 | 0.302218  | 0.408316  |
|   | 11 | 0.0460333   | 0.0263546 | 0.087 | −0.007016 | 0.099082  |
|   | 12 | 0.2962667*  | 0.0263546 | 0.000 | 0.243218  | 0.349316  |
|   | 13 | 0.3546667*  | 0.0263546 | 0.000 | 0.301618  | 0.407716  |
|   | 14 | 0.3320000*  | 0.0263546 | 0.000 | 0.278951  | 0.385049  |
|   | 15 | 0.3546667*  | 0.0263546 | 0.000 | 0.301618  | 0.407716  |
|   | 16 | 0.3546667*  | 0.0263546 | 0.000 | 0.301618  | 0.407716  |
|   | 17 | 0.3546667*  | 0.0263546 | 0.000 | 0.301618  | 0.407716  |
|   | 18 | 0.3352667*  | 0.0263546 | 0.000 | 0.282218  | 0.388316  |
|   | 19 | −0.1033667* | 0.0263546 | 0.000 | −0.156416 | −0.050318 |
|   | 20 | 0.3546667*  | 0.0263546 | 0.000 | 0.301618  | 0.407716  |
|   | 21 | 0.0590667*  | 0.0263546 | 0.030 | 0.006018  | 0.112116  |
|   | 22 | 0.2442333*  | 0.0263546 | 0.000 | 0.191184  | 0.297282  |
|   | 23 | −0.4194333* | 0.0263546 | 0.000 | −0.472482 | −0.366384 |
| 6 | 1  | −0.0006000  | 0.0263546 | 0.982 | −0.053649 | 0.052449  |
|   | 2  | −0.8023000* | 0.0263546 | 0.000 | −0.855349 | −0.749251 |
|   | 3  | −0.0006000  | 0.0263546 | 0.982 | −0.053649 | 0.052449  |
|   | 4  | −0.0918000* | 0.0263546 | 0.001 | −0.144849 | −0.038751 |
|   | 5  | −0.3552667* | 0.0263546 | 0.000 | −0.408316 | −0.302218 |

|   |    |             |           |       |           |           |
|---|----|-------------|-----------|-------|-----------|-----------|
|   | 7  | −0.6877000* | 0.0263546 | 0.000 | −0.740749 | −0.634651 |
|   | 8  | −0.0006000  | 0.0263546 | 0.982 | −0.053649 | 0.052449  |
|   | 9  | −0.5805000* | 0.0263546 | 0.000 | −0.633549 | −0.527451 |
|   | 10 | 0.0000000   | 0.0263546 | 1.000 | −0.053049 | 0.053049  |
|   | 11 | −0.3092333* | 0.0263546 | 0.000 | −0.362282 | −0.256184 |
|   | 12 | −0.0590000* | 0.0263546 | 0.030 | −0.112049 | −0.005951 |
|   | 13 | −0.0006000  | 0.0263546 | 0.982 | −0.053649 | 0.052449  |
|   | 14 | −0.0232667  | 0.0263546 | 0.382 | −0.076316 | 0.029782  |
|   | 15 | −0.0006000  | 0.0263546 | 0.982 | −0.053649 | 0.052449  |
|   | 16 | −0.0006000  | 0.0263546 | 0.982 | −0.053649 | 0.052449  |
|   | 17 | −0.0006000  | 0.0263546 | 0.982 | −0.053649 | 0.052449  |
|   | 18 | −0.0200000  | 0.0263546 | 0.452 | −0.073049 | 0.033049  |
|   | 19 | −0.4586333* | 0.0263546 | 0.000 | −0.511682 | −0.405584 |
|   | 20 | −0.0006000  | 0.0263546 | 0.982 | −0.053649 | 0.052449  |
|   | 21 | −0.2962000* | 0.0263546 | 0.000 | −0.349249 | −0.243151 |
|   | 22 | −0.1110333* | 0.0263546 | 0.000 | −0.164082 | −0.057984 |
|   | 23 | −0.7747000* | 0.0263546 | 0.000 | −0.827749 | −0.721651 |
| 7 | 1  | 0.6871000*  | 0.0263546 | 0.000 | 0.634051  | 0.740149  |
|   | 2  | −0.1146000* | 0.0263546 | 0.000 | −0.167649 | −0.061551 |
|   | 3  | 0.6871000*  | 0.0263546 | 0.000 | 0.634051  | 0.740149  |
|   | 4  | 0.5959000*  | 0.0263546 | 0.000 | 0.542851  | 0.648949  |
|   | 5  | 0.3324333*  | 0.0263546 | 0.000 | 0.279384  | 0.385482  |
|   | 6  | 0.6877000*  | 0.0263546 | 0.000 | 0.634651  | 0.740749  |
|   | 8  | 0.6871000*  | 0.0263546 | 0.000 | 0.634051  | 0.740149  |
|   | 9  | 0.1072000*  | 0.0263546 | 0.000 | 0.054151  | 0.160249  |
|   | 10 | 0.6877000*  | 0.0263546 | 0.000 | 0.634651  | 0.740749  |
|   | 11 | 0.3784667*  | 0.0263546 | 0.000 | 0.325418  | 0.431516  |
|   | 12 | 0.6287000*  | 0.0263546 | 0.000 | 0.575651  | 0.681749  |
|   | 13 | 0.6871000*  | 0.0263546 | 0.000 | 0.634051  | 0.740149  |
|   | 14 | 0.6644333*  | 0.0263546 | 0.000 | 0.611384  | 0.717482  |
|   | 15 | 0.6871000*  | 0.0263546 | 0.000 | 0.634051  | 0.740149  |
|   | 16 | 0.6871000*  | 0.0263546 | 0.000 | 0.634051  | 0.740149  |
|   | 17 | 0.6871000*  | 0.0263546 | 0.000 | 0.634051  | 0.740149  |
|   | 18 | 0.6677000*  | 0.0263546 | 0.000 | 0.614651  | 0.720749  |
|   | 19 | 0.2290667*  | 0.0263546 | 0.000 | 0.176018  | 0.282116  |
|   | 20 | 0.6871000*  | 0.0263546 | 0.000 | 0.634051  | 0.740149  |
|   | 21 | 0.3915000*  | 0.0263546 | 0.000 | 0.338451  | 0.444549  |
|   | 22 | 0.5766667*  | 0.0263546 | 0.000 | 0.523618  | 0.629716  |
|   | 23 | −0.0870000* | 0.0263546 | 0.002 | −0.140049 | −0.033951 |
| 8 | 1  | 0.0000000   | 0.0263546 | 1.000 | −0.053049 | 0.053049  |
|   | 2  | −0.8017000* | 0.0263546 | 0.000 | −0.854749 | −0.748651 |

|   |    |             |           |       |           |           |
|---|----|-------------|-----------|-------|-----------|-----------|
|   | 3  | 0.0000000   | 0.0263546 | 1.000 | −0.053049 | 0.053049  |
|   | 4  | −0.0912000* | 0.0263546 | 0.001 | −0.144249 | −0.038151 |
|   | 5  | −0.3546667* | 0.0263546 | 0.000 | −0.407716 | −0.301618 |
|   | 6  | 0.0006000   | 0.0263546 | 0.982 | −0.052449 | 0.053649  |
|   | 7  | −0.6871000* | 0.0263546 | 0.000 | −0.740149 | −0.634051 |
|   | 9  | −0.5799000* | 0.0263546 | 0.000 | −0.632949 | −0.526851 |
|   | 10 | 0.0006000   | 0.0263546 | 0.982 | −0.052449 | 0.053649  |
|   | 11 | −0.3086333* | 0.0263546 | 0.000 | −0.361682 | −0.255584 |
|   | 12 | −0.0584000* | 0.0263546 | 0.032 | −0.111449 | −0.005351 |
|   | 13 | 0.0000000   | 0.0263546 | 1.000 | −0.053049 | 0.053049  |
|   | 14 | −0.0226667  | 0.0263546 | 0.394 | −0.075716 | 0.030382  |
|   | 15 | 0.0000000   | 0.0263546 | 1.000 | −0.053049 | 0.053049  |
|   | 16 | 0.0000000   | 0.0263546 | 1.000 | −0.053049 | 0.053049  |
|   | 17 | 0.0000000   | 0.0263546 | 1.000 | −0.053049 | 0.053049  |
|   | 18 | −0.0194000  | 0.0263546 | 0.465 | −0.072449 | 0.033649  |
|   | 19 | −0.4580333* | 0.0263546 | 0.000 | −0.511082 | −0.404984 |
|   | 20 | 0.0000000   | 0.0263546 | 1.000 | −0.053049 | 0.053049  |
|   | 21 | −0.2956000* | 0.0263546 | 0.000 | −0.348649 | −0.242551 |
|   | 22 | −0.1104333* | 0.0263546 | 0.000 | −0.163482 | −0.057384 |
|   | 23 | −0.7741000* | 0.0263546 | 0.000 | −0.827149 | −0.721051 |
| 9 | 1  | 0.5799000*  | 0.0263546 | 0.000 | 0.526851  | 0.632949  |
|   | 2  | −0.2218000* | 0.0263546 | 0.000 | −0.274849 | −0.168751 |
|   | 3  | 0.5799000*  | 0.0263546 | 0.000 | 0.526851  | 0.632949  |
|   | 4  | 0.4887000*  | 0.0263546 | 0.000 | 0.435651  | 0.541749  |
|   | 5  | 0.2252333*  | 0.0263546 | 0.000 | 0.172184  | 0.278282  |
|   | 6  | 0.5805000*  | 0.0263546 | 0.000 | 0.527451  | 0.633549  |
|   | 7  | −0.1072000* | 0.0263546 | 0.000 | −0.160249 | −0.054151 |
|   | 8  | 0.5799000*  | 0.0263546 | 0.000 | 0.526851  | 0.632949  |
|   | 10 | 0.5805000*  | 0.0263546 | 0.000 | 0.527451  | 0.633549  |
|   | 11 | 0.2712667*  | 0.0263546 | 0.000 | 0.218218  | 0.324316  |
|   | 12 | 0.5215000*  | 0.0263546 | 0.000 | 0.468451  | 0.574549  |
|   | 13 | 0.5799000*  | 0.0263546 | 0.000 | 0.526851  | 0.632949  |
|   | 14 | 0.5572333*  | 0.0263546 | 0.000 | 0.504184  | 0.610282  |
|   | 15 | 0.5799000*  | 0.0263546 | 0.000 | 0.526851  | 0.632949  |
|   | 16 | 0.5799000*  | 0.0263546 | 0.000 | 0.526851  | 0.632949  |
|   | 17 | 0.5799000*  | 0.0263546 | 0.000 | 0.526851  | 0.632949  |
|   | 18 | 0.5605000*  | 0.0263546 | 0.000 | 0.507451  | 0.613549  |
|   | 19 | 0.1218667*  | 0.0263546 | 0.000 | 0.068818  | 0.174916  |
|   | 20 | 0.5799000*  | 0.0263546 | 0.000 | 0.526851  | 0.632949  |
|   | 21 | 0.2843000*  | 0.0263546 | 0.000 | 0.231251  | 0.337349  |
|   | 22 | 0.4694667*  | 0.0263546 | 0.000 | 0.416418  | 0.522516  |



|    |    |             |           |       |           |           |
|----|----|-------------|-----------|-------|-----------|-----------|
|    | 23 | −0.1942000* | 0.0263546 | 0.000 | −0.247249 | −0.141151 |
| 10 | 1  | −0.0006000  | 0.0263546 | 0.982 | −0.053649 | 0.052449  |
|    | 2  | −0.8023000* | 0.0263546 | 0.000 | −0.855349 | −0.749251 |
|    | 3  | −0.0006000  | 0.0263546 | 0.982 | −0.053649 | 0.052449  |
|    | 4  | −0.0918000* | 0.0263546 | 0.001 | −0.144849 | −0.038751 |
|    | 5  | −0.3552667* | 0.0263546 | 0.000 | −0.408316 | −0.302218 |
|    | 6  | 0.0000000   | 0.0263546 | 1.000 | −0.053049 | 0.053049  |
|    | 7  | −0.6877000* | 0.0263546 | 0.000 | −0.740749 | −0.634651 |
|    | 8  | −0.0006000  | 0.0263546 | 0.982 | −0.053649 | 0.052449  |
|    | 9  | −0.5805000* | 0.0263546 | 0.000 | −0.633549 | −0.527451 |
|    | 11 | −0.3092333* | 0.0263546 | 0.000 | −0.362282 | −0.256184 |
|    | 12 | −0.0590000* | 0.0263546 | 0.030 | −0.112049 | −0.005951 |
|    | 13 | −0.0006000  | 0.0263546 | 0.982 | −0.053649 | 0.052449  |
|    | 14 | −0.0232667  | 0.0263546 | 0.382 | −0.076316 | 0.029782  |
|    | 15 | −0.0006000  | 0.0263546 | 0.982 | −0.053649 | 0.052449  |
|    | 16 | −0.0006000  | 0.0263546 | 0.982 | −0.053649 | 0.052449  |
|    | 17 | −0.0006000  | 0.0263546 | 0.982 | −0.053649 | 0.052449  |
|    | 18 | −0.0200000  | 0.0263546 | 0.452 | −0.073049 | 0.033049  |
|    | 19 | −0.4586333* | 0.0263546 | 0.000 | −0.511682 | −0.405584 |
|    | 20 | −0.0006000  | 0.0263546 | 0.982 | −0.053649 | 0.052449  |
|    | 21 | −0.2962000* | 0.0263546 | 0.000 | −0.349249 | −0.243151 |
|    | 22 | −0.1110333* | 0.0263546 | 0.000 | −0.164082 | −0.057984 |
|    | 23 | −0.7747000* | 0.0263546 | 0.000 | −0.827749 | −0.721651 |
| 11 | 1  | 0.3086333*  | 0.0263546 | 0.000 | 0.255584  | 0.361682  |
|    | 2  | −0.4930667* | 0.0263546 | 0.000 | −0.546116 | −0.440018 |
|    | 3  | 0.3086333*  | 0.0263546 | 0.000 | 0.255584  | 0.361682  |
|    | 4  | 0.2174333*  | 0.0263546 | 0.000 | 0.164384  | 0.270482  |
|    | 5  | −0.0460333  | 0.0263546 | 0.087 | −0.099082 | 0.007016  |
|    | 6  | 0.3092333*  | 0.0263546 | 0.000 | 0.256184  | 0.362282  |
|    | 7  | −0.3784667* | 0.0263546 | 0.000 | −0.431516 | −0.325418 |
|    | 8  | 0.3086333*  | 0.0263546 | 0.000 | 0.255584  | 0.361682  |
|    | 9  | −0.2712667* | 0.0263546 | 0.000 | −0.324316 | −0.218218 |
|    | 10 | 0.3092333*  | 0.0263546 | 0.000 | 0.256184  | 0.362282  |
|    | 12 | 0.2502333*  | 0.0263546 | 0.000 | 0.197184  | 0.303282  |
|    | 13 | 0.3086333*  | 0.0263546 | 0.000 | 0.255584  | 0.361682  |
|    | 14 | 0.2859667*  | 0.0263546 | 0.000 | 0.232918  | 0.339016  |
|    | 15 | 0.3086333*  | 0.0263546 | 0.000 | 0.255584  | 0.361682  |
|    | 16 | 0.3086333*  | 0.0263546 | 0.000 | 0.255584  | 0.361682  |
|    | 17 | 0.3086333*  | 0.0263546 | 0.000 | 0.255584  | 0.361682  |
|    | 18 | 0.2892333*  | 0.0263546 | 0.000 | 0.236184  | 0.342282  |
|    | 19 | −0.1494000* | 0.0263546 | 0.000 | −0.202449 | −0.096351 |

|    |    |             |           |       |           |           |
|----|----|-------------|-----------|-------|-----------|-----------|
|    | 20 | 0.3086333*  | 0.0263546 | 0.000 | 0.255584  | 0.361682  |
|    | 21 | 0.0130333   | 0.0263546 | 0.623 | −0.040016 | 0.066082  |
|    | 22 | 0.1982000*  | 0.0263546 | 0.000 | 0.145151  | 0.251249  |
|    | 23 | −0.4654667* | 0.0263546 | 0.000 | −0.518516 | −0.412418 |
| 12 | 1  | 0.0584000*  | 0.0263546 | 0.032 | 0.005351  | 0.111449  |
|    | 2  | −0.7433000* | 0.0263546 | 0.000 | −0.796349 | −0.690251 |
|    | 3  | 0.0584000*  | 0.0263546 | 0.032 | 0.005351  | 0.111449  |
|    | 4  | −0.0328000  | 0.0263546 | 0.220 | −0.085849 | 0.020249  |
|    | 5  | −0.2962667* | 0.0263546 | 0.000 | −0.349316 | −0.243218 |
|    | 6  | 0.0590000*  | 0.0263546 | 0.030 | 0.005951  | 0.112049  |
|    | 7  | −0.6287000* | 0.0263546 | 0.000 | −0.681749 | −0.575651 |
|    | 8  | 0.0584000*  | 0.0263546 | 0.032 | 0.005351  | 0.111449  |
|    | 9  | −0.5215000* | 0.0263546 | 0.000 | −0.574549 | −0.468451 |
|    | 10 | 0.0590000*  | 0.0263546 | 0.030 | 0.005951  | 0.112049  |
|    | 11 | −0.2502333* | 0.0263546 | 0.000 | −0.303282 | −0.197184 |
|    | 13 | 0.0584000*  | 0.0263546 | 0.032 | 0.005351  | 0.111449  |
|    | 14 | 0.0357333   | 0.0263546 | 0.182 | −0.017316 | 0.088782  |
|    | 15 | 0.0584000*  | 0.0263546 | 0.032 | 0.005351  | 0.111449  |
|    | 16 | 0.0584000*  | 0.0263546 | 0.032 | 0.005351  | 0.111449  |
|    | 17 | 0.0584000*  | 0.0263546 | 0.032 | 0.005351  | 0.111449  |
|    | 18 | 0.0390000   | 0.0263546 | 0.146 | −0.014049 | 0.092049  |
|    | 19 | −0.3996333* | 0.0263546 | 0.000 | −0.452682 | −0.346584 |
|    | 20 | 0.0584000*  | 0.0263546 | 0.032 | 0.005351  | 0.111449  |
|    | 21 | −0.2372000* | 0.0263546 | 0.000 | −0.290249 | −0.184151 |
|    | 22 | −0.0520333  | 0.0263546 | 0.054 | −0.105082 | 0.001016  |
|    | 23 | −0.7157000* | 0.0263546 | 0.000 | −0.768749 | −0.662651 |
| 13 | 1  | 0.0000000   | 0.0263546 | 1.000 | −0.053049 | 0.053049  |
|    | 2  | −0.8017000* | 0.0263546 | 0.000 | −0.854749 | −0.748651 |
|    | 3  | 0.0000000   | 0.0263546 | 1.000 | −0.053049 | 0.053049  |
|    | 4  | −0.0912000* | 0.0263546 | 0.001 | −0.144249 | −0.038151 |
|    | 5  | −0.3546667* | 0.0263546 | 0.000 | −0.407716 | −0.301618 |
|    | 6  | 0.0006000   | 0.0263546 | 0.982 | −0.052449 | 0.053649  |
|    | 7  | −0.6871000* | 0.0263546 | 0.000 | −0.740149 | −0.634051 |
|    | 8  | 0.0000000   | 0.0263546 | 1.000 | −0.053049 | 0.053049  |
|    | 9  | −0.5799000* | 0.0263546 | 0.000 | −0.632949 | −0.526851 |
|    | 10 | 0.0006000   | 0.0263546 | 0.982 | −0.052449 | 0.053649  |
|    | 11 | −0.3086333* | 0.0263546 | 0.000 | −0.361682 | −0.255584 |
|    | 12 | −0.0584000* | 0.0263546 | 0.032 | −0.111449 | −0.005351 |
|    | 14 | −0.0226667  | 0.0263546 | 0.394 | −0.075716 | 0.030382  |
|    | 15 | 0.0000000   | 0.0263546 | 1.000 | −0.053049 | 0.053049  |
|    | 16 | 0.0000000   | 0.0263546 | 1.000 | −0.053049 | 0.053049  |

|    |    |             |           |       |           |           |
|----|----|-------------|-----------|-------|-----------|-----------|
|    | 17 | 0.0000000   | 0.0263546 | 1.000 | −0.053049 | 0.053049  |
|    | 18 | −0.0194000  | 0.0263546 | 0.465 | −0.072449 | 0.033649  |
|    | 19 | −0.4580333* | 0.0263546 | 0.000 | −0.511082 | −0.404984 |
|    | 20 | 0.0000000   | 0.0263546 | 1.000 | −0.053049 | 0.053049  |
|    | 21 | −0.2956000* | 0.0263546 | 0.000 | −0.348649 | −0.242551 |
|    | 22 | −0.1104333* | 0.0263546 | 0.000 | −0.163482 | −0.057384 |
|    | 23 | −0.7741000* | 0.0263546 | 0.000 | −0.827149 | −0.721051 |
| 14 | 1  | 0.0226667   | 0.0263546 | 0.394 | −0.030382 | 0.075716  |
|    | 2  | −0.7790333* | 0.0263546 | 0.000 | −0.832082 | −0.725984 |
|    | 3  | 0.0226667   | 0.0263546 | 0.394 | −0.030382 | 0.075716  |
|    | 4  | −0.0685333* | 0.0263546 | 0.012 | −0.121582 | −0.015484 |
|    | 5  | −0.3320000* | 0.0263546 | 0.000 | −0.385049 | −0.278951 |
|    | 6  | 0.0232667   | 0.0263546 | 0.382 | −0.029782 | 0.076316  |
|    | 7  | −0.6644333* | 0.0263546 | 0.000 | −0.717482 | −0.611384 |
|    | 8  | 0.0226667   | 0.0263546 | 0.394 | −0.030382 | 0.075716  |
|    | 9  | −0.5572333* | 0.0263546 | 0.000 | −0.610282 | −0.504184 |
|    | 10 | 0.0232667   | 0.0263546 | 0.382 | −0.029782 | 0.076316  |
|    | 11 | −0.2859667* | 0.0263546 | 0.000 | −0.339016 | −0.232918 |
|    | 12 | −0.0357333  | 0.0263546 | 0.182 | −0.088782 | 0.017316  |
|    | 13 | 0.0226667   | 0.0263546 | 0.394 | −0.030382 | 0.075716  |
|    | 15 | 0.0226667   | 0.0263546 | 0.394 | −0.030382 | 0.075716  |
|    | 16 | 0.0226667   | 0.0263546 | 0.394 | −0.030382 | 0.075716  |
|    | 17 | 0.0226667   | 0.0263546 | 0.394 | −0.030382 | 0.075716  |
|    | 18 | 0.0032667   | 0.0263546 | 0.902 | −0.049782 | 0.056316  |
|    | 19 | −0.4353667* | 0.0263546 | 0.000 | −0.488416 | −0.382318 |
|    | 20 | 0.0226667   | 0.0263546 | 0.394 | −0.030382 | 0.075716  |
|    | 21 | −0.2729333* | 0.0263546 | 0.000 | −0.325982 | −0.219884 |
|    | 22 | −0.0877667* | 0.0263546 | 0.002 | −0.140816 | −0.034718 |
|    | 23 | −0.7514333* | 0.0263546 | 0.000 | −0.804482 | −0.698384 |
| 15 | 1  | 0.0000000   | 0.0263546 | 1.000 | −0.053049 | 0.053049  |
|    | 2  | −0.8017000* | 0.0263546 | 0.000 | −0.854749 | −0.748651 |
|    | 3  | 0.0000000   | 0.0263546 | 1.000 | −0.053049 | 0.053049  |
|    | 4  | −0.0912000* | 0.0263546 | 0.001 | −0.144249 | −0.038151 |
|    | 5  | −0.3546667* | 0.0263546 | 0.000 | −0.407716 | −0.301618 |
|    | 6  | 0.0006000   | 0.0263546 | 0.982 | −0.052449 | 0.053649  |
|    | 7  | −0.6871000* | 0.0263546 | 0.000 | −0.740149 | −0.634051 |
|    | 8  | 0.0000000   | 0.0263546 | 1.000 | −0.053049 | 0.053049  |
|    | 9  | −0.5799000* | 0.0263546 | 0.000 | −0.632949 | −0.526851 |
|    | 10 | 0.0006000   | 0.0263546 | 0.982 | −0.052449 | 0.053649  |
|    | 11 | −0.3086333* | 0.0263546 | 0.000 | −0.361682 | −0.255584 |
|    | 12 | −0.0584000* | 0.0263546 | 0.032 | −0.111449 | −0.005351 |

|    |    |             |           |       |           |           |
|----|----|-------------|-----------|-------|-----------|-----------|
|    | 13 | 0.0000000   | 0.0263546 | 1.000 | −0.053049 | 0.053049  |
|    | 14 | −0.0226667  | 0.0263546 | 0.394 | −0.075716 | 0.030382  |
|    | 16 | 0.0000000   | 0.0263546 | 1.000 | −0.053049 | 0.053049  |
|    | 17 | 0.0000000   | 0.0263546 | 1.000 | −0.053049 | 0.053049  |
|    | 18 | −0.0194000  | 0.0263546 | 0.465 | −0.072449 | 0.033649  |
|    | 19 | −0.4580333* | 0.0263546 | 0.000 | −0.511082 | −0.404984 |
|    | 20 | 0.0000000   | 0.0263546 | 1.000 | −0.053049 | 0.053049  |
|    | 21 | −0.2956000* | 0.0263546 | 0.000 | −0.348649 | −0.242551 |
|    | 22 | −0.1104333* | 0.0263546 | 0.000 | −0.163482 | −0.057384 |
|    | 23 | −0.7741000* | 0.0263546 | 0.000 | −0.827149 | −0.721051 |
| 16 | 1  | 0.0000000   | 0.0263546 | 1.000 | −0.053049 | 0.053049  |
|    | 2  | −0.8017000* | 0.0263546 | 0.000 | −0.854749 | −0.748651 |
|    | 3  | 0.0000000   | 0.0263546 | 1.000 | −0.053049 | 0.053049  |
|    | 4  | −0.0912000* | 0.0263546 | 0.001 | −0.144249 | −0.038151 |
|    | 5  | −0.3546667* | 0.0263546 | 0.000 | −0.407716 | −0.301618 |
|    | 6  | 0.0006000   | 0.0263546 | 0.982 | −0.052449 | 0.053649  |
|    | 7  | −0.6871000* | 0.0263546 | 0.000 | −0.740149 | −0.634051 |
|    | 8  | 0.0000000   | 0.0263546 | 1.000 | −0.053049 | 0.053049  |
|    | 9  | −0.5799000* | 0.0263546 | 0.000 | −0.632949 | −0.526851 |
|    | 10 | 0.0006000   | 0.0263546 | 0.982 | −0.052449 | 0.053649  |
|    | 11 | −0.3086333* | 0.0263546 | 0.000 | −0.361682 | −0.255584 |
|    | 12 | −0.0584000* | 0.0263546 | 0.032 | −0.111449 | −0.005351 |
|    | 13 | 0.0000000   | 0.0263546 | 1.000 | −0.053049 | 0.053049  |
|    | 14 | −0.0226667  | 0.0263546 | 0.394 | −0.075716 | 0.030382  |
|    | 15 | 0.0000000   | 0.0263546 | 1.000 | −0.053049 | 0.053049  |
|    | 17 | 0.0000000   | 0.0263546 | 1.000 | −0.053049 | 0.053049  |
|    | 18 | −0.0194000  | 0.0263546 | 0.465 | −0.072449 | 0.033649  |
|    | 19 | −0.4580333* | 0.0263546 | 0.000 | −0.511082 | −0.404984 |
|    | 20 | 0.0000000   | 0.0263546 | 1.000 | −0.053049 | 0.053049  |
|    | 21 | −0.2956000* | 0.0263546 | 0.000 | −0.348649 | −0.242551 |
|    | 22 | −0.1104333* | 0.0263546 | 0.000 | −0.163482 | −0.057384 |
|    | 23 | −0.7741000* | 0.0263546 | 0.000 | −0.827149 | −0.721051 |
| 17 | 1  | 0.0000000   | 0.0263546 | 1.000 | −0.053049 | 0.053049  |
|    | 2  | −0.8017000* | 0.0263546 | 0.000 | −0.854749 | −0.748651 |
|    | 3  | 0.0000000   | 0.0263546 | 1.000 | −0.053049 | 0.053049  |
|    | 4  | −0.0912000* | 0.0263546 | 0.001 | −0.144249 | −0.038151 |
|    | 5  | −0.3546667* | 0.0263546 | 0.000 | −0.407716 | −0.301618 |
|    | 6  | 0.0006000   | 0.0263546 | 0.982 | −0.052449 | 0.053649  |
|    | 7  | −0.6871000* | 0.0263546 | 0.000 | −0.740149 | −0.634051 |
|    | 8  | 0.0000000   | 0.0263546 | 1.000 | −0.053049 | 0.053049  |
|    | 9  | −0.5799000* | 0.0263546 | 0.000 | −0.632949 | −0.526851 |

|    |    |             |           |       |           |           |
|----|----|-------------|-----------|-------|-----------|-----------|
|    | 10 | 0.0006000   | 0.0263546 | 0.982 | −0.052449 | 0.053649  |
|    | 11 | −0.3086333* | 0.0263546 | 0.000 | −0.361682 | −0.255584 |
|    | 12 | −0.0584000* | 0.0263546 | 0.032 | −0.111449 | −0.005351 |
|    | 13 | 0.0000000   | 0.0263546 | 1.000 | −0.053049 | 0.053049  |
|    | 14 | −0.0226667  | 0.0263546 | 0.394 | −0.075716 | 0.030382  |
|    | 15 | 0.0000000   | 0.0263546 | 1.000 | −0.053049 | 0.053049  |
|    | 16 | 0.0000000   | 0.0263546 | 1.000 | −0.053049 | 0.053049  |
|    | 18 | −0.0194000  | 0.0263546 | 0.465 | −0.072449 | 0.033649  |
|    | 19 | −0.4580333* | 0.0263546 | 0.000 | −0.511082 | −0.404984 |
|    | 20 | 0.0000000   | 0.0263546 | 1.000 | −0.053049 | 0.053049  |
|    | 21 | −0.2956000* | 0.0263546 | 0.000 | −0.348649 | −0.242551 |
|    | 22 | −0.1104333* | 0.0263546 | 0.000 | −0.163482 | −0.057384 |
|    | 23 | −0.7741000* | 0.0263546 | 0.000 | −0.827149 | −0.721051 |
| 18 | 1  | 0.0194000   | 0.0263546 | 0.465 | −0.033649 | 0.072449  |
|    | 2  | −0.7823000* | 0.0263546 | 0.000 | −0.835349 | −0.729251 |
|    | 3  | 0.0194000   | 0.0263546 | 0.465 | −0.033649 | 0.072449  |
|    | 4  | −0.0718000* | 0.0263546 | 0.009 | −0.124849 | −0.018751 |
|    | 5  | −0.3352667* | 0.0263546 | 0.000 | −0.388316 | −0.282218 |
|    | 6  | 0.0200000   | 0.0263546 | 0.452 | −0.033049 | 0.073049  |
|    | 7  | −0.6677000* | 0.0263546 | 0.000 | −0.720749 | −0.614651 |
|    | 8  | 0.0194000   | 0.0263546 | 0.465 | −0.033649 | 0.072449  |
|    | 9  | −0.5605000* | 0.0263546 | 0.000 | −0.613549 | −0.507451 |
|    | 10 | 0.0200000   | 0.0263546 | 0.452 | −0.033049 | 0.073049  |
|    | 11 | −0.2892333* | 0.0263546 | 0.000 | −0.342282 | −0.236184 |
|    | 12 | −0.0390000  | 0.0263546 | 0.146 | −0.092049 | 0.014049  |
|    | 13 | 0.0194000   | 0.0263546 | 0.465 | −0.033649 | 0.072449  |
|    | 14 | −0.0032667  | 0.0263546 | 0.902 | −0.056316 | 0.049782  |
|    | 15 | 0.0194000   | 0.0263546 | 0.465 | −0.033649 | 0.072449  |
|    | 16 | 0.0194000   | 0.0263546 | 0.465 | −0.033649 | 0.072449  |
|    | 17 | 0.0194000   | 0.0263546 | 0.465 | −0.033649 | 0.072449  |
|    | 19 | −0.4386333* | 0.0263546 | 0.000 | −0.491682 | −0.385584 |
|    | 20 | 0.0194000   | 0.0263546 | 0.465 | −0.033649 | 0.072449  |
|    | 21 | −0.2762000* | 0.0263546 | 0.000 | −0.329249 | −0.223151 |
|    | 22 | −0.0910333* | 0.0263546 | 0.001 | −0.144082 | −0.037984 |
|    | 23 | −0.7547000* | 0.0263546 | 0.000 | −0.807749 | −0.701651 |
| 19 | 1  | 0.4580333*  | 0.0263546 | 0.000 | 0.404984  | 0.511082  |
|    | 2  | −0.3436667* | 0.0263546 | 0.000 | −0.396716 | −0.290618 |
|    | 3  | 0.4580333*  | 0.0263546 | 0.000 | 0.404984  | 0.511082  |
|    | 4  | 0.3668333*  | 0.0263546 | 0.000 | 0.313784  | 0.419882  |
|    | 5  | 0.1033667*  | 0.0263546 | 0.000 | 0.050318  | 0.156416  |
|    | 6  | 0.4586333*  | 0.0263546 | 0.000 | 0.405584  | 0.511682  |

|    |    |             |           |       |           |           |
|----|----|-------------|-----------|-------|-----------|-----------|
|    | 7  | −0.2290667* | 0.0263546 | 0.000 | −0.282116 | −0.176018 |
|    | 8  | 0.4580333*  | 0.0263546 | 0.000 | 0.404984  | 0.511082  |
|    | 9  | −0.1218667* | 0.0263546 | 0.000 | −0.174916 | −0.068818 |
|    | 10 | 0.4586333*  | 0.0263546 | 0.000 | 0.405584  | 0.511682  |
|    | 11 | 0.1494000*  | 0.0263546 | 0.000 | 0.096351  | 0.202449  |
|    | 12 | 0.3996333*  | 0.0263546 | 0.000 | 0.346584  | 0.452682  |
|    | 13 | 0.4580333*  | 0.0263546 | 0.000 | 0.404984  | 0.511082  |
|    | 14 | 0.4353667*  | 0.0263546 | 0.000 | 0.382318  | 0.488416  |
|    | 15 | 0.4580333*  | 0.0263546 | 0.000 | 0.404984  | 0.511082  |
|    | 16 | 0.4580333*  | 0.0263546 | 0.000 | 0.404984  | 0.511082  |
|    | 17 | 0.4580333*  | 0.0263546 | 0.000 | 0.404984  | 0.511082  |
|    | 18 | 0.4386333*  | 0.0263546 | 0.000 | 0.385584  | 0.491682  |
|    | 20 | 0.4580333*  | 0.0263546 | 0.000 | 0.404984  | 0.511082  |
|    | 21 | 0.1624333*  | 0.0263546 | 0.000 | 0.109384  | 0.215482  |
|    | 22 | 0.3476000*  | 0.0263546 | 0.000 | 0.294551  | 0.400649  |
|    | 23 | −0.3160667* | 0.0263546 | 0.000 | −0.369116 | −0.263018 |
| 20 | 1  | 0.0000000   | 0.0263546 | 1.000 | −0.053049 | 0.053049  |
|    | 2  | −0.8017000* | 0.0263546 | 0.000 | −0.854749 | −0.748651 |
|    | 3  | 0.0000000   | 0.0263546 | 1.000 | −0.053049 | 0.053049  |
|    | 4  | −0.0912000* | 0.0263546 | 0.001 | −0.144249 | −0.038151 |
|    | 5  | −0.3546667* | 0.0263546 | 0.000 | −0.407716 | −0.301618 |
|    | 6  | 0.0006000   | 0.0263546 | 0.982 | −0.052449 | 0.053649  |
|    | 7  | −0.6871000* | 0.0263546 | 0.000 | −0.740149 | −0.634051 |
|    | 8  | 0.0000000   | 0.0263546 | 1.000 | −0.053049 | 0.053049  |
|    | 9  | −0.5799000* | 0.0263546 | 0.000 | −0.632949 | −0.526851 |
|    | 10 | 0.0006000   | 0.0263546 | 0.982 | −0.052449 | 0.053649  |
|    | 11 | −0.3086333* | 0.0263546 | 0.000 | −0.361682 | −0.255584 |
|    | 12 | −0.0584000* | 0.0263546 | 0.032 | −0.111449 | −0.005351 |
|    | 13 | 0.0000000   | 0.0263546 | 1.000 | −0.053049 | 0.053049  |
|    | 14 | −0.0226667  | 0.0263546 | 0.394 | −0.075716 | 0.030382  |
|    | 15 | 0.0000000   | 0.0263546 | 1.000 | −0.053049 | 0.053049  |
|    | 16 | 0.0000000   | 0.0263546 | 1.000 | −0.053049 | 0.053049  |
|    | 17 | 0.0000000   | 0.0263546 | 1.000 | −0.053049 | 0.053049  |
|    | 18 | −0.0194000  | 0.0263546 | 0.465 | −0.072449 | 0.033649  |
|    | 19 | −0.4580333* | 0.0263546 | 0.000 | −0.511082 | −0.404984 |
|    | 21 | −0.2956000* | 0.0263546 | 0.000 | −0.348649 | −0.242551 |
|    | 22 | −0.1104333* | 0.0263546 | 0.000 | −0.163482 | −0.057384 |
|    | 23 | −0.7741000* | 0.0263546 | 0.000 | −0.827149 | −0.721051 |
| 21 | 1  | 0.2956000*  | 0.0263546 | 0.000 | 0.242551  | 0.348649  |
|    | 2  | −0.5061000* | 0.0263546 | 0.000 | −0.559149 | −0.453051 |
|    | 3  | 0.2956000*  | 0.0263546 | 0.000 | 0.242551  | 0.348649  |

|    |    |             |           |       |           |           |
|----|----|-------------|-----------|-------|-----------|-----------|
|    | 4  | 0.2044000*  | 0.0263546 | 0.000 | 0.151351  | 0.257449  |
|    | 5  | −0.0590667* | 0.0263546 | 0.030 | −0.112116 | −0.006018 |
|    | 6  | 0.2962000*  | 0.0263546 | 0.000 | 0.243151  | 0.349249  |
|    | 7  | −0.3915000* | 0.0263546 | 0.000 | −0.444549 | −0.338451 |
|    | 8  | 0.2956000*  | 0.0263546 | 0.000 | 0.242551  | 0.348649  |
|    | 9  | −0.2843000* | 0.0263546 | 0.000 | −0.337349 | −0.231251 |
|    | 10 | 0.2962000*  | 0.0263546 | 0.000 | 0.243151  | 0.349249  |
|    | 11 | −0.0130333  | 0.0263546 | 0.623 | −0.066082 | 0.040016  |
|    | 12 | 0.2372000*  | 0.0263546 | 0.000 | 0.184151  | 0.290249  |
|    | 13 | 0.2956000*  | 0.0263546 | 0.000 | 0.242551  | 0.348649  |
|    | 14 | 0.2729333*  | 0.0263546 | 0.000 | 0.219884  | 0.325982  |
|    | 15 | 0.2956000*  | 0.0263546 | 0.000 | 0.242551  | 0.348649  |
|    | 16 | 0.2956000*  | 0.0263546 | 0.000 | 0.242551  | 0.348649  |
|    | 17 | 0.2956000*  | 0.0263546 | 0.000 | 0.242551  | 0.348649  |
|    | 18 | 0.2762000*  | 0.0263546 | 0.000 | 0.223151  | 0.329249  |
|    | 19 | −0.1624333* | 0.0263546 | 0.000 | −0.215482 | −0.109384 |
|    | 20 | 0.2956000*  | 0.0263546 | 0.000 | 0.242551  | 0.348649  |
|    | 22 | 0.1851667*  | 0.0263546 | 0.000 | 0.132118  | 0.238216  |
|    | 23 | −0.4785000* | 0.0263546 | 0.000 | −0.531549 | −0.425451 |
| 22 | 1  | 0.1104333*  | 0.0263546 | 0.000 | 0.057384  | 0.163482  |
|    | 2  | −0.6912667* | 0.0263546 | 0.000 | −0.744316 | −0.638218 |
|    | 3  | 0.1104333*  | 0.0263546 | 0.000 | 0.057384  | 0.163482  |
|    | 4  | 0.0192333   | 0.0263546 | 0.469 | −0.033816 | 0.072282  |
|    | 5  | −0.2442333* | 0.0263546 | 0.000 | −0.297282 | −0.191184 |
|    | 6  | 0.1110333*  | 0.0263546 | 0.000 | 0.057984  | 0.164082  |
|    | 7  | −0.5766667* | 0.0263546 | 0.000 | −0.629716 | −0.523618 |
|    | 8  | 0.1104333*  | 0.0263546 | 0.000 | 0.057384  | 0.163482  |
|    | 9  | −0.4694667* | 0.0263546 | 0.000 | −0.522516 | −0.416418 |
|    | 10 | 0.1110333*  | 0.0263546 | 0.000 | 0.057984  | 0.164082  |
|    | 11 | −0.1982000* | 0.0263546 | 0.000 | −0.251249 | −0.145151 |
|    | 12 | 0.0520333   | 0.0263546 | 0.054 | −0.001016 | 0.105082  |
|    | 13 | 0.1104333*  | 0.0263546 | 0.000 | 0.057384  | 0.163482  |
|    | 14 | 0.0877667*  | 0.0263546 | 0.002 | 0.034718  | 0.140816  |
|    | 15 | 0.1104333*  | 0.0263546 | 0.000 | 0.057384  | 0.163482  |
|    | 16 | 0.1104333*  | 0.0263546 | 0.000 | 0.057384  | 0.163482  |
|    | 17 | 0.1104333*  | 0.0263546 | 0.000 | 0.057384  | 0.163482  |
|    | 18 | 0.0910333*  | 0.0263546 | 0.001 | 0.037984  | 0.144082  |
|    | 19 | −0.3476000* | 0.0263546 | 0.000 | −0.400649 | −0.294551 |
|    | 20 | 0.1104333*  | 0.0263546 | 0.000 | 0.057384  | 0.163482  |
|    | 21 | −0.1851667* | 0.0263546 | 0.000 | −0.238216 | −0.132118 |
|    | 23 | −0.6636667* | 0.0263546 | 0.000 | −0.716716 | −0.610618 |

|    |    |            |           |       |           |          |
|----|----|------------|-----------|-------|-----------|----------|
| 23 | 1  | 0.7741000* | 0.0263546 | 0.000 | 0.721051  | 0.827149 |
|    | 2  | −0.0276000 | 0.0263546 | 0.300 | −0.080649 | 0.025449 |
|    | 3  | 0.7741000* | 0.0263546 | 0.000 | 0.721051  | 0.827149 |
|    | 4  | 0.6829000* | 0.0263546 | 0.000 | 0.629851  | 0.735949 |
|    | 5  | 0.4194333* | 0.0263546 | 0.000 | 0.366384  | 0.472482 |
|    | 6  | 0.7747000* | 0.0263546 | 0.000 | 0.721651  | 0.827749 |
|    | 7  | 0.0870000* | 0.0263546 | 0.002 | 0.033951  | 0.140049 |
|    | 8  | 0.7741000* | 0.0263546 | 0.000 | 0.721051  | 0.827149 |
|    | 9  | 0.1942000* | 0.0263546 | 0.000 | 0.141151  | 0.247249 |
|    | 10 | 0.7747000* | 0.0263546 | 0.000 | 0.721651  | 0.827749 |
|    | 11 | 0.4654667* | 0.0263546 | 0.000 | 0.412418  | 0.518516 |
|    | 12 | 0.7157000* | 0.0263546 | 0.000 | 0.662651  | 0.768749 |
|    | 13 | 0.7741000* | 0.0263546 | 0.000 | 0.721051  | 0.827149 |
|    | 14 | 0.7514333* | 0.0263546 | 0.000 | 0.698384  | 0.804482 |
|    | 15 | 0.7741000* | 0.0263546 | 0.000 | 0.721051  | 0.827149 |
|    | 16 | 0.7741000* | 0.0263546 | 0.000 | 0.721051  | 0.827149 |
|    | 17 | 0.7741000* | 0.0263546 | 0.000 | 0.721051  | 0.827149 |
|    | 18 | 0.7547000* | 0.0263546 | 0.000 | 0.701651  | 0.807749 |
|    | 19 | 0.3160667* | 0.0263546 | 0.000 | 0.263018  | 0.369116 |
|    | 20 | 0.7741000* | 0.0263546 | 0.000 | 0.721051  | 0.827149 |
|    | 21 | 0.4785000* | 0.0263546 | 0.000 | 0.425451  | 0.531549 |
|    | 22 | 0.6636667* | 0.0263546 | 0.000 | 0.610618  | 0.716716 |

\*. The mean difference is significant at the 0.05 level.



**Table S2.** One-way ANOVA method was employed for statistical analysis of the inhibitions of 23 treatments on the pathogen *Magnaporthe oryzae*. Nos. 1-22 were EtOAc extracts of endophytes and No. 23 was the positive control carbendazim.

| Descriptives |    |           |                |            |                                  |             |
|--------------|----|-----------|----------------|------------|----------------------------------|-------------|
| Inhibition   |    |           |                |            |                                  |             |
|              | N  | Mean      | Std. Deviation | Std. Error | 95% Confidence Interval for Mean |             |
|              |    |           |                |            | Lower Bound                      | Upper Bound |
| 1            | 3  | 0.157300  | 0.0112000      | 0.0064663  | 0.129478                         | 0.185122    |
| 2            | 3  | 0.191000  | 0.0000000      | 0.0000000  | 0.191000                         | 0.191000    |
| 3            | 3  | 0.131100  | 0.0171520      | 0.0099027  | 0.088492                         | 0.173708    |
| 4            | 3  | 0.224700  | 0.0225000      | 0.0129904  | 0.168807                         | 0.280593    |
| 5            | 3  | 0.123600  | 0.0000000      | 0.0000000  | 0.123600                         | 0.123600    |
| 6            | 3  | 0.134850  | 0.0224500      | 0.0129615  | 0.079081                         | 0.190619    |
| 7            | 3  | 0.243433  | 0.0065241      | 0.0037667  | 0.227227                         | 0.259640    |
| 8            | 3  | 0.129200  | 0.0056000      | 0.0032332  | 0.115289                         | 0.143111    |
| 9            | 3  | 0.207850  | 0.0056500      | 0.0032620  | 0.193815                         | 0.221885    |
| 10           | 3  | 0.134850  | 0.0449500      | 0.0259519  | 0.023188                         | 0.246512    |
| 11           | 3  | 0.044950  | 0.0112500      | 0.0064952  | 0.017003                         | 0.072897    |
| 12           | 3  | 0.039350  | 0.0000000      | 0.0000000  | 0.039350                         | 0.039350    |
| 13           | 3  | 0.191000  | 0.0000000      | 0.0000000  | 0.191000                         | 0.191000    |
| 14           | 3  | 0.048700  | 0.0282920      | 0.0163344  | −0.021581                        | 0.118981    |
| 15           | 3  | 0.213500  | 0.0000000      | 0.0000000  | 0.213500                         | 0.213500    |
| 16           | 3  | 0.097400  | 0.0576818      | 0.0333026  | −0.045890                        | 0.240690    |
| 17           | 3  | −0.014978 | 0.0394834      | 0.0227957  | −0.113060                        | 0.083104    |
| 18           | 3  | 0.123600  | 0.0449000      | 0.0259230  | 0.012062                         | 0.235138    |
| 19           | 3  | 0.209733  | 0.0394850      | 0.0227967  | 0.111647                         | 0.307819    |
| 20           | 3  | 0.044967  | 0.0194567      | 0.0112333  | −0.003366                        | 0.093300    |
| 21           | 3  | 0.185400  | 0.0056000      | 0.0032332  | 0.171489                         | 0.199311    |
| 22           | 3  | 0.297750  | 0.0056500      | 0.0032620  | 0.283715                         | 0.311785    |
| 23           | 3  | 1.000000  | 0.0000000      | 0.0000000  | 1.000000                         | 1.000000    |
| Total        | 69 | 0.180837  | 0.1923356      | 0.0231545  | 0.134633                         | 0.227041    |

| Descriptives |         |         |
|--------------|---------|---------|
| Inhibition   |         |         |
|              | Minimum | Maximum |
| 1            | 0.1461  | 0.1685  |
| 2            | 0.1910  | 0.1910  |

|       |         |        |
|-------|---------|--------|
| 3     | 0.1124  | 0.1461 |
| 4     | 0.2022  | 0.2472 |
| 5     | 0.1236  | 0.1236 |
| 6     | 0.1124  | 0.1573 |
| 7     | 0.2359  | 0.2472 |
| 8     | 0.1236  | 0.1348 |
| 9     | 0.2022  | 0.2135 |
| 10    | 0.0899  | 0.1798 |
| 11    | 0.0337  | 0.0562 |
| 12    | 0.0394  | 0.0394 |
| 13    | 0.1910  | 0.1910 |
| 14    | 0.0225  | 0.0787 |
| 15    | 0.2135  | 0.2135 |
| 16    | 0.0337  | 0.1461 |
| 17    | −0.0562 | 0.0225 |
| 18    | 0.0787  | 0.1685 |
| 19    | 0.1685  | 0.2472 |
| 20    | 0.0225  | 0.0562 |
| 21    | 0.1798  | 0.1910 |
| 22    | 0.2921  | 0.3034 |
| 23    | 1.0000  | 1.0000 |
| Total | −0.0562 | 1.0000 |

### Test of Homogeneity of Variances

|            |                                      | Levene Statistic | df1 | df2    | Sig.  |
|------------|--------------------------------------|------------------|-----|--------|-------|
| Inhibition | Based on Mean                        | 2.941            | 22  | 46     | 0.001 |
|            | Based on Median                      | 1.766            | 22  | 46     | 0.052 |
|            | Based on Median and with adjusted df | 1.766            | 22  | 13.261 | 0.143 |
|            | Based on trimmed mean                | 2.869            | 22  | 46     | 0.001 |

### ANOVA

| Inhibition     |                |    |             |         |       |
|----------------|----------------|----|-------------|---------|-------|
|                | Sum of Squares | df | Mean Square | F       | Sig.  |
| Between Groups | 2.489          | 22 | 0.113       | 194.369 | 0.000 |
| Within Groups  | 0.027          | 46 | 0.001       |         |       |
| Total          | 2.516          | 68 |             |         |       |

Post Hoc Tests

## Multiple Comparisons

Dependent Variable: Inhibition

LSD

| (I) Strains | (J) Strains | Mean Difference<br>(I-J) | Std. Error | Sig.  | 95% Confidence Interval |             |
|-------------|-------------|--------------------------|------------|-------|-------------------------|-------------|
|             |             |                          |            |       | Lower Bound             | Upper Bound |
| 1           | 2           | -0.0337000               | 0.0196979  | 0.094 | -0.073350               | 0.005950    |
|             | 3           | 0.0262000                | 0.0196979  | 0.190 | -0.013450               | 0.065850    |
|             | 4           | -0.0674000*              | 0.0196979  | 0.001 | -0.107050               | -0.027750   |
|             | 5           | 0.0337000                | 0.0196979  | 0.094 | -0.005950               | 0.073350    |
|             | 6           | 0.0224500                | 0.0196979  | 0.260 | -0.017200               | 0.062100    |
|             | 7           | -0.0861333*              | 0.0196979  | 0.000 | -0.125783               | -0.046483   |
|             | 8           | 0.0281000                | 0.0196979  | 0.160 | -0.011550               | 0.067750    |
|             | 9           | -0.0505500*              | 0.0196979  | 0.014 | -0.090200               | -0.010900   |
|             | 10          | 0.0224500                | 0.0196979  | 0.260 | -0.017200               | 0.062100    |
|             | 11          | 0.1123500*               | 0.0196979  | 0.000 | 0.072700                | 0.152000    |
|             | 12          | 0.1179500*               | 0.0196979  | 0.000 | 0.078300                | 0.157600    |
|             | 13          | -0.0337000               | 0.0196979  | 0.094 | -0.073350               | 0.005950    |
|             | 14          | 0.1086000*               | 0.0196979  | 0.000 | 0.068950                | 0.148250    |
|             | 15          | -0.0562000*              | 0.0196979  | 0.006 | -0.095850               | -0.016550   |
|             | 16          | 0.0599000*               | 0.0196979  | 0.004 | 0.020250                | 0.099550    |
|             | 17          | 0.1722778*               | 0.0196979  | 0.000 | 0.132628                | 0.211928    |
|             | 18          | 0.0337000                | 0.0196979  | 0.094 | -0.005950               | 0.073350    |
|             | 19          | -0.0524333*              | 0.0196979  | 0.011 | -0.092083               | -0.012783   |
|             | 20          | 0.1123333*               | 0.0196979  | 0.000 | 0.072683                | 0.151983    |
|             | 21          | -0.0281000               | 0.0196979  | 0.160 | -0.067750               | 0.011550    |
|             | 22          | -0.1404500*              | 0.0196979  | 0.000 | -0.180100               | -0.100800   |
|             | 23          | -0.8427000*              | 0.0196979  | 0.000 | -0.882350               | -0.803050   |
| 2           | 1           | 0.0337000                | 0.0196979  | 0.094 | -0.005950               | 0.073350    |
|             | 3           | 0.0599000*               | 0.0196979  | 0.004 | 0.020250                | 0.099550    |
|             | 4           | -0.0337000               | 0.0196979  | 0.094 | -0.073350               | 0.005950    |
|             | 5           | 0.0674000*               | 0.0196979  | 0.001 | 0.027750                | 0.107050    |
|             | 6           | 0.0561500*               | 0.0196979  | 0.007 | 0.016500                | 0.095800    |
|             | 7           | -0.0524333*              | 0.0196979  | 0.011 | -0.092083               | -0.012783   |
|             | 8           | 0.0618000*               | 0.0196979  | 0.003 | 0.022150                | 0.101450    |
|             | 9           | -0.0168500               | 0.0196979  | 0.397 | -0.056500               | 0.022800    |
|             | 10          | 0.0561500*               | 0.0196979  | 0.007 | 0.016500                | 0.095800    |
|             | 11          | 0.1460500*               | 0.0196979  | 0.000 | 0.106400                | 0.185700    |
|             | 12          | 0.1516500*               | 0.0196979  | 0.000 | 0.112000                | 0.191300    |
|             | 13          | 0.0000000                | 0.0196979  | 1.000 | -0.039650               | 0.039650    |
|             | 14          | 0.1423000*               | 0.0196979  | 0.000 | 0.102650                | 0.181950    |
|             | 15          | -0.0225000               | 0.0196979  | 0.259 | -0.062150               | 0.017150    |

|   |    |             |           |       |           |           |
|---|----|-------------|-----------|-------|-----------|-----------|
|   | 16 | 0.0936000*  | 0.0196979 | 0.000 | 0.053950  | 0.133250  |
|   | 17 | 0.2059778*  | 0.0196979 | 0.000 | 0.166328  | 0.245628  |
|   | 18 | 0.0674000*  | 0.0196979 | 0.001 | 0.027750  | 0.107050  |
|   | 19 | −0.0187333  | 0.0196979 | 0.347 | −0.058383 | 0.020917  |
|   | 20 | 0.1460333*  | 0.0196979 | 0.000 | 0.106383  | 0.185683  |
|   | 21 | 0.0056000   | 0.0196979 | 0.777 | −0.034050 | 0.045250  |
|   | 22 | −0.1067500* | 0.0196979 | 0.000 | −0.146400 | −0.067100 |
|   | 23 | −0.8090000* | 0.0196979 | 0.000 | −0.848650 | −0.769350 |
| 3 | 1  | −0.0262000  | 0.0196979 | 0.190 | −0.065850 | 0.013450  |
|   | 2  | −0.0599000* | 0.0196979 | 0.004 | −0.099550 | −0.020250 |
|   | 4  | −0.0936000* | 0.0196979 | 0.000 | −0.133250 | −0.053950 |
|   | 5  | 0.0075000   | 0.0196979 | 0.705 | −0.032150 | 0.047150  |
|   | 6  | −0.0037500  | 0.0196979 | 0.850 | −0.043400 | 0.035900  |
|   | 7  | −0.1123333* | 0.0196979 | 0.000 | −0.151983 | −0.072683 |
|   | 8  | 0.0019000   | 0.0196979 | 0.924 | −0.037750 | 0.041550  |
|   | 9  | −0.0767500* | 0.0196979 | 0.000 | −0.116400 | −0.037100 |
|   | 10 | −0.0037500  | 0.0196979 | 0.850 | −0.043400 | 0.035900  |
|   | 11 | 0.0861500*  | 0.0196979 | 0.000 | 0.046500  | 0.125800  |
|   | 12 | 0.0917500*  | 0.0196979 | 0.000 | 0.052100  | 0.131400  |
|   | 13 | −0.0599000* | 0.0196979 | 0.004 | −0.099550 | −0.020250 |
|   | 14 | 0.0824000*  | 0.0196979 | 0.000 | 0.042750  | 0.122050  |
|   | 15 | −0.0824000* | 0.0196979 | 0.000 | −0.122050 | −0.042750 |
|   | 16 | 0.0337000   | 0.0196979 | 0.094 | −0.005950 | 0.073350  |
|   | 17 | 0.1460778*  | 0.0196979 | 0.000 | 0.106428  | 0.185728  |
|   | 18 | 0.0075000   | 0.0196979 | 0.705 | −0.032150 | 0.047150  |
|   | 19 | −0.0786333* | 0.0196979 | 0.000 | −0.118283 | −0.038983 |
|   | 20 | 0.0861333*  | 0.0196979 | 0.000 | 0.046483  | 0.125783  |
|   | 21 | −0.0543000* | 0.0196979 | 0.008 | −0.093950 | −0.014650 |
|   | 22 | −0.1666500* | 0.0196979 | 0.000 | −0.206300 | −0.127000 |
|   | 23 | −0.8689000* | 0.0196979 | 0.000 | −0.908550 | −0.829250 |
| 4 | 1  | 0.0674000*  | 0.0196979 | 0.001 | 0.027750  | 0.107050  |
|   | 2  | 0.0337000   | 0.0196979 | 0.094 | −0.005950 | 0.073350  |
|   | 3  | 0.0936000*  | 0.0196979 | 0.000 | 0.053950  | 0.133250  |
|   | 5  | 0.1011000*  | 0.0196979 | 0.000 | 0.061450  | 0.140750  |
|   | 6  | 0.0898500*  | 0.0196979 | 0.000 | 0.050200  | 0.129500  |
|   | 7  | −0.0187333  | 0.0196979 | 0.347 | −0.058383 | 0.020917  |
|   | 8  | 0.0955000*  | 0.0196979 | 0.000 | 0.055850  | 0.135150  |
|   | 9  | 0.0168500   | 0.0196979 | 0.397 | −0.022800 | 0.056500  |
|   | 10 | 0.0898500*  | 0.0196979 | 0.000 | 0.050200  | 0.129500  |
|   | 11 | 0.1797500*  | 0.0196979 | 0.000 | 0.140100  | 0.219400  |
|   | 12 | 0.1853500*  | 0.0196979 | 0.000 | 0.145700  | 0.225000  |

|   |    |             |           |       |           |           |
|---|----|-------------|-----------|-------|-----------|-----------|
|   | 13 | 0.0337000   | 0.0196979 | 0.094 | −0.005950 | 0.073350  |
|   | 14 | 0.1760000*  | 0.0196979 | 0.000 | 0.136350  | 0.215650  |
|   | 15 | 0.0112000   | 0.0196979 | 0.572 | −0.028450 | 0.050850  |
|   | 16 | 0.1273000*  | 0.0196979 | 0.000 | 0.087650  | 0.166950  |
|   | 17 | 0.2396778*  | 0.0196979 | 0.000 | 0.200028  | 0.279328  |
|   | 18 | 0.1011000*  | 0.0196979 | 0.000 | 0.061450  | 0.140750  |
|   | 19 | 0.0149667   | 0.0196979 | 0.451 | −0.024683 | 0.054617  |
|   | 20 | 0.1797333*  | 0.0196979 | 0.000 | 0.140083  | 0.219383  |
|   | 21 | 0.0393000   | 0.0196979 | 0.052 | −0.000350 | 0.078950  |
|   | 22 | −0.0730500* | 0.0196979 | 0.001 | −0.112700 | −0.033400 |
|   | 23 | −0.7753000* | 0.0196979 | 0.000 | −0.814950 | −0.735650 |
| 5 | 1  | −0.0337000  | 0.0196979 | 0.094 | −0.073350 | 0.005950  |
|   | 2  | −0.0674000* | 0.0196979 | 0.001 | −0.107050 | −0.027750 |
|   | 3  | −0.0075000  | 0.0196979 | 0.705 | −0.047150 | 0.032150  |
|   | 4  | −0.1011000* | 0.0196979 | 0.000 | −0.140750 | −0.061450 |
|   | 6  | −0.0112500  | 0.0196979 | 0.571 | −0.050900 | 0.028400  |
|   | 7  | −0.1198333* | 0.0196979 | 0.000 | −0.159483 | −0.080183 |
|   | 8  | −0.0056000  | 0.0196979 | 0.777 | −0.045250 | 0.034050  |
|   | 9  | −0.0842500* | 0.0196979 | 0.000 | −0.123900 | −0.044600 |
|   | 10 | −0.0112500  | 0.0196979 | 0.571 | −0.050900 | 0.028400  |
|   | 11 | 0.0786500*  | 0.0196979 | 0.000 | 0.039000  | 0.118300  |
|   | 12 | 0.0842500*  | 0.0196979 | 0.000 | 0.044600  | 0.123900  |
|   | 13 | −0.0674000* | 0.0196979 | 0.001 | −0.107050 | −0.027750 |
|   | 14 | 0.0749000*  | 0.0196979 | 0.000 | 0.035250  | 0.114550  |
|   | 15 | −0.0899000* | 0.0196979 | 0.000 | −0.129550 | −0.050250 |
|   | 16 | 0.0262000   | 0.0196979 | 0.190 | −0.013450 | 0.065850  |
|   | 17 | 0.1385778*  | 0.0196979 | 0.000 | 0.098928  | 0.178228  |
|   | 18 | 0.0000000   | 0.0196979 | 1.000 | −0.039650 | 0.039650  |
|   | 19 | −0.0861333* | 0.0196979 | 0.000 | −0.125783 | −0.046483 |
|   | 20 | 0.0786333*  | 0.0196979 | 0.000 | 0.038983  | 0.118283  |
|   | 21 | −0.0618000* | 0.0196979 | 0.003 | −0.101450 | −0.022150 |
|   | 22 | −0.1741500* | 0.0196979 | 0.000 | −0.213800 | −0.134500 |
|   | 23 | −0.8764000* | 0.0196979 | 0.000 | −0.916050 | −0.836750 |
| 6 | 1  | −0.0224500  | 0.0196979 | 0.260 | −0.062100 | 0.017200  |
|   | 2  | −0.0561500* | 0.0196979 | 0.007 | −0.095800 | −0.016500 |
|   | 3  | 0.0037500   | 0.0196979 | 0.850 | −0.035900 | 0.043400  |
|   | 4  | −0.0898500* | 0.0196979 | 0.000 | −0.129500 | −0.050200 |
|   | 5  | 0.0112500   | 0.0196979 | 0.571 | −0.028400 | 0.050900  |
|   | 7  | −0.1085833* | 0.0196979 | 0.000 | −0.148233 | −0.068933 |
|   | 8  | 0.0056500   | 0.0196979 | 0.776 | −0.034000 | 0.045300  |
|   | 9  | −0.0730000* | 0.0196979 | 0.001 | −0.112650 | −0.033350 |

|   |    |             |           |       |           |           |
|---|----|-------------|-----------|-------|-----------|-----------|
|   | 10 | 0.0000000   | 0.0196979 | 1.000 | −0.039650 | 0.039650  |
|   | 11 | 0.0899000*  | 0.0196979 | 0.000 | 0.050250  | 0.129550  |
|   | 12 | 0.0955000*  | 0.0196979 | 0.000 | 0.055850  | 0.135150  |
|   | 13 | −0.0561500* | 0.0196979 | 0.007 | −0.095800 | −0.016500 |
|   | 14 | 0.0861500*  | 0.0196979 | 0.000 | 0.046500  | 0.125800  |
|   | 15 | −0.0786500* | 0.0196979 | 0.000 | −0.118300 | −0.039000 |
|   | 16 | 0.0374500   | 0.0196979 | 0.064 | −0.002200 | 0.077100  |
|   | 17 | 0.1498278*  | 0.0196979 | 0.000 | 0.110178  | 0.189478  |
|   | 18 | 0.0112500   | 0.0196979 | 0.571 | −0.028400 | 0.050900  |
|   | 19 | −0.0748833* | 0.0196979 | 0.000 | −0.114533 | −0.035233 |
|   | 20 | 0.0898833*  | 0.0196979 | 0.000 | 0.050233  | 0.129533  |
|   | 21 | −0.0505500* | 0.0196979 | 0.014 | −0.090200 | −0.010900 |
|   | 22 | −0.1629000* | 0.0196979 | 0.000 | −0.202550 | −0.123250 |
|   | 23 | −0.8651500* | 0.0196979 | 0.000 | −0.904800 | −0.825500 |
| 7 | 1  | 0.0861333*  | 0.0196979 | 0.000 | 0.046483  | 0.125783  |
|   | 2  | 0.0524333*  | 0.0196979 | 0.011 | 0.012783  | 0.092083  |
|   | 3  | 0.1123333*  | 0.0196979 | 0.000 | 0.072683  | 0.151983  |
|   | 4  | 0.0187333   | 0.0196979 | 0.347 | −0.020917 | 0.058383  |
|   | 5  | 0.1198333*  | 0.0196979 | 0.000 | 0.080183  | 0.159483  |
|   | 6  | 0.1085833*  | 0.0196979 | 0.000 | 0.068933  | 0.148233  |
|   | 8  | 0.1142333*  | 0.0196979 | 0.000 | 0.074583  | 0.153883  |
|   | 9  | 0.0355833   | 0.0196979 | 0.077 | −0.004067 | 0.075233  |
|   | 10 | 0.1085833*  | 0.0196979 | 0.000 | 0.068933  | 0.148233  |
|   | 11 | 0.1984833*  | 0.0196979 | 0.000 | 0.158833  | 0.238133  |
|   | 12 | 0.2040833*  | 0.0196979 | 0.000 | 0.164433  | 0.243733  |
|   | 13 | 0.0524333*  | 0.0196979 | 0.011 | 0.012783  | 0.092083  |
|   | 14 | 0.1947333*  | 0.0196979 | 0.000 | 0.155083  | 0.234383  |
|   | 15 | 0.0299333   | 0.0196979 | 0.135 | −0.009717 | 0.069583  |
|   | 16 | 0.1460333*  | 0.0196979 | 0.000 | 0.106383  | 0.185683  |
|   | 17 | 0.2584111*  | 0.0196979 | 0.000 | 0.218761  | 0.298061  |
|   | 18 | 0.1198333*  | 0.0196979 | 0.000 | 0.080183  | 0.159483  |
|   | 19 | 0.0337000   | 0.0196979 | 0.094 | −0.005950 | 0.073350  |
|   | 20 | 0.1984667*  | 0.0196979 | 0.000 | 0.158817  | 0.238117  |
|   | 21 | 0.0580333*  | 0.0196979 | 0.005 | 0.018383  | 0.097683  |
|   | 22 | −0.0543167* | 0.0196979 | 0.008 | −0.093967 | −0.014667 |
|   | 23 | −0.7565667* | 0.0196979 | 0.000 | −0.796217 | −0.716917 |
| 8 | 1  | −0.0281000  | 0.0196979 | 0.160 | −0.067750 | 0.011550  |
|   | 2  | −0.0618000* | 0.0196979 | 0.003 | −0.101450 | −0.022150 |
|   | 3  | −0.0019000  | 0.0196979 | 0.924 | −0.041550 | 0.037750  |
|   | 4  | −0.0955000* | 0.0196979 | 0.000 | −0.135150 | −0.055850 |
|   | 5  | 0.0056000   | 0.0196979 | 0.777 | −0.034050 | 0.045250  |

|    |    |             |           |       |           |           |
|----|----|-------------|-----------|-------|-----------|-----------|
|    | 6  | −0.0056500  | 0.0196979 | 0.776 | −0.045300 | 0.034000  |
|    | 7  | −0.1142333* | 0.0196979 | 0.000 | −0.153883 | −0.074583 |
|    | 9  | −0.0786500* | 0.0196979 | 0.000 | −0.118300 | −0.039000 |
|    | 10 | −0.0056500  | 0.0196979 | 0.776 | −0.045300 | 0.034000  |
|    | 11 | 0.0842500*  | 0.0196979 | 0.000 | 0.044600  | 0.123900  |
|    | 12 | 0.0898500*  | 0.0196979 | 0.000 | 0.050200  | 0.129500  |
|    | 13 | −0.0618000* | 0.0196979 | 0.003 | −0.101450 | −0.022150 |
|    | 14 | 0.0805000*  | 0.0196979 | 0.000 | 0.040850  | 0.120150  |
|    | 15 | −0.0843000* | 0.0196979 | 0.000 | −0.123950 | −0.044650 |
|    | 16 | 0.0318000   | 0.0196979 | 0.113 | −0.007850 | 0.071450  |
|    | 17 | 0.1441778*  | 0.0196979 | 0.000 | 0.104528  | 0.183828  |
|    | 18 | 0.0056000   | 0.0196979 | 0.777 | −0.034050 | 0.045250  |
|    | 19 | −0.0805333* | 0.0196979 | 0.000 | −0.120183 | −0.040883 |
|    | 20 | 0.0842333*  | 0.0196979 | 0.000 | 0.044583  | 0.123883  |
|    | 21 | −0.0562000* | 0.0196979 | 0.006 | −0.095850 | −0.016550 |
|    | 22 | −0.1685500* | 0.0196979 | 0.000 | −0.208200 | −0.128900 |
|    | 23 | −0.8708000* | 0.0196979 | 0.000 | −0.910450 | −0.831150 |
| 9  | 1  | 0.0505500*  | 0.0196979 | 0.014 | 0.010900  | 0.090200  |
|    | 2  | 0.0168500   | 0.0196979 | 0.397 | −0.022800 | 0.056500  |
|    | 3  | 0.0767500*  | 0.0196979 | 0.000 | 0.037100  | 0.116400  |
|    | 4  | −0.0168500  | 0.0196979 | 0.397 | −0.056500 | 0.022800  |
|    | 5  | 0.0842500*  | 0.0196979 | 0.000 | 0.044600  | 0.123900  |
|    | 6  | 0.0730000*  | 0.0196979 | 0.001 | 0.033350  | 0.112650  |
|    | 7  | −0.0355833  | 0.0196979 | 0.077 | −0.075233 | 0.004067  |
|    | 8  | 0.0786500*  | 0.0196979 | 0.000 | 0.039000  | 0.118300  |
|    | 10 | 0.0730000*  | 0.0196979 | 0.001 | 0.033350  | 0.112650  |
|    | 11 | 0.1629000*  | 0.0196979 | 0.000 | 0.123250  | 0.202550  |
|    | 12 | 0.1685000*  | 0.0196979 | 0.000 | 0.128850  | 0.208150  |
|    | 13 | 0.0168500   | 0.0196979 | 0.397 | −0.022800 | 0.056500  |
|    | 14 | 0.1591500*  | 0.0196979 | 0.000 | 0.119500  | 0.198800  |
|    | 15 | −0.0056500  | 0.0196979 | 0.776 | −0.045300 | 0.034000  |
|    | 16 | 0.1104500*  | 0.0196979 | 0.000 | 0.070800  | 0.150100  |
|    | 17 | 0.2228278*  | 0.0196979 | 0.000 | 0.183178  | 0.262478  |
|    | 18 | 0.0842500*  | 0.0196979 | 0.000 | 0.044600  | 0.123900  |
|    | 19 | −0.0018833  | 0.0196979 | 0.924 | −0.041533 | 0.037767  |
|    | 20 | 0.1628833*  | 0.0196979 | 0.000 | 0.123233  | 0.202533  |
|    | 21 | 0.0224500   | 0.0196979 | 0.260 | −0.017200 | 0.062100  |
|    | 22 | −0.0899000* | 0.0196979 | 0.000 | −0.129550 | −0.050250 |
|    | 23 | −0.7921500* | 0.0196979 | 0.000 | −0.831800 | −0.752500 |
| 10 | 1  | −0.0224500  | 0.0196979 | 0.260 | −0.062100 | 0.017200  |
|    | 2  | −0.0561500* | 0.0196979 | 0.007 | −0.095800 | −0.016500 |



|    |    |             |           |       |           |           |
|----|----|-------------|-----------|-------|-----------|-----------|
|    | 3  | 0.0037500   | 0.0196979 | 0.850 | −0.035900 | 0.043400  |
|    | 4  | −0.0898500* | 0.0196979 | 0.000 | −0.129500 | −0.050200 |
|    | 5  | 0.0112500   | 0.0196979 | 0.571 | −0.028400 | 0.050900  |
|    | 6  | 0.0000000   | 0.0196979 | 1.000 | −0.039650 | 0.039650  |
|    | 7  | −0.1085833* | 0.0196979 | 0.000 | −0.148233 | −0.068933 |
|    | 8  | 0.0056500   | 0.0196979 | 0.776 | −0.034000 | 0.045300  |
|    | 9  | −0.0730000* | 0.0196979 | 0.001 | −0.112650 | −0.033350 |
|    | 11 | 0.0899000*  | 0.0196979 | 0.000 | 0.050250  | 0.129550  |
|    | 12 | 0.0955000*  | 0.0196979 | 0.000 | 0.055850  | 0.135150  |
|    | 13 | −0.0561500* | 0.0196979 | 0.007 | −0.095800 | −0.016500 |
|    | 14 | 0.0861500*  | 0.0196979 | 0.000 | 0.046500  | 0.125800  |
|    | 15 | −0.0786500* | 0.0196979 | 0.000 | −0.118300 | −0.039000 |
|    | 16 | 0.0374500   | 0.0196979 | 0.064 | −0.002200 | 0.077100  |
|    | 17 | 0.1498278*  | 0.0196979 | 0.000 | 0.110178  | 0.189478  |
|    | 18 | 0.0112500   | 0.0196979 | 0.571 | −0.028400 | 0.050900  |
|    | 19 | −0.0748833* | 0.0196979 | 0.000 | −0.114533 | −0.035233 |
|    | 20 | 0.0898833*  | 0.0196979 | 0.000 | 0.050233  | 0.129533  |
|    | 21 | −0.0505500* | 0.0196979 | 0.014 | −0.090200 | −0.010900 |
|    | 22 | −0.1629000* | 0.0196979 | 0.000 | −0.202550 | −0.123250 |
|    | 23 | −0.8651500* | 0.0196979 | 0.000 | −0.904800 | −0.825500 |
| 11 | 1  | −0.1123500* | 0.0196979 | 0.000 | −0.152000 | −0.072700 |
|    | 2  | −0.1460500* | 0.0196979 | 0.000 | −0.185700 | −0.106400 |
|    | 3  | −0.0861500* | 0.0196979 | 0.000 | −0.125800 | −0.046500 |
|    | 4  | −0.1797500* | 0.0196979 | 0.000 | −0.219400 | −0.140100 |
|    | 5  | −0.0786500* | 0.0196979 | 0.000 | −0.118300 | −0.039000 |
|    | 6  | −0.0899000* | 0.0196979 | 0.000 | −0.129550 | −0.050250 |
|    | 7  | −0.1984833* | 0.0196979 | 0.000 | −0.238133 | −0.158833 |
|    | 8  | −0.0842500* | 0.0196979 | 0.000 | −0.123900 | −0.044600 |
|    | 9  | −0.1629000* | 0.0196979 | 0.000 | −0.202550 | −0.123250 |
|    | 10 | −0.0899000* | 0.0196979 | 0.000 | −0.129550 | −0.050250 |
|    | 12 | 0.0056000   | 0.0196979 | 0.777 | −0.034050 | 0.045250  |
|    | 13 | −0.1460500* | 0.0196979 | 0.000 | −0.185700 | −0.106400 |
|    | 14 | −0.0037500  | 0.0196979 | 0.850 | −0.043400 | 0.035900  |
|    | 15 | −0.1685500* | 0.0196979 | 0.000 | −0.208200 | −0.128900 |
|    | 16 | −0.0524500* | 0.0196979 | 0.011 | −0.092100 | −0.012800 |
|    | 17 | 0.0599278*  | 0.0196979 | 0.004 | 0.020278  | 0.099578  |
|    | 18 | −0.0786500* | 0.0196979 | 0.000 | −0.118300 | −0.039000 |
|    | 19 | −0.1647833* | 0.0196979 | 0.000 | −0.204433 | −0.125133 |
|    | 20 | −0.0000167  | 0.0196979 | 0.999 | −0.039667 | 0.039633  |
|    | 21 | −0.1404500* | 0.0196979 | 0.000 | −0.180100 | −0.100800 |
|    | 22 | −0.2528000* | 0.0196979 | 0.000 | −0.292450 | −0.213150 |

|    |    |             |           |       |           |           |
|----|----|-------------|-----------|-------|-----------|-----------|
|    | 23 | −0.9550500* | 0.0196979 | 0.000 | −0.994700 | −0.915400 |
| 12 | 1  | −0.1179500* | 0.0196979 | 0.000 | −0.157600 | −0.078300 |
|    | 2  | −0.1516500* | 0.0196979 | 0.000 | −0.191300 | −0.112000 |
|    | 3  | −0.0917500* | 0.0196979 | 0.000 | −0.131400 | −0.052100 |
|    | 4  | −0.1853500* | 0.0196979 | 0.000 | −0.225000 | −0.145700 |
|    | 5  | −0.0842500* | 0.0196979 | 0.000 | −0.123900 | −0.044600 |
|    | 6  | −0.0955000* | 0.0196979 | 0.000 | −0.135150 | −0.055850 |
|    | 7  | −0.2040833* | 0.0196979 | 0.000 | −0.243733 | −0.164433 |
|    | 8  | −0.0898500* | 0.0196979 | 0.000 | −0.129500 | −0.050200 |
|    | 9  | −0.1685000* | 0.0196979 | 0.000 | −0.208150 | −0.128850 |
|    | 10 | −0.0955000* | 0.0196979 | 0.000 | −0.135150 | −0.055850 |
|    | 11 | −0.0056000  | 0.0196979 | 0.777 | −0.045250 | 0.034050  |
|    | 13 | −0.1516500* | 0.0196979 | 0.000 | −0.191300 | −0.112000 |
|    | 14 | −0.0093500  | 0.0196979 | 0.637 | −0.049000 | 0.030300  |
|    | 15 | −0.1741500* | 0.0196979 | 0.000 | −0.213800 | −0.134500 |
|    | 16 | −0.0580500* | 0.0196979 | 0.005 | −0.097700 | −0.018400 |
|    | 17 | 0.0543278*  | 0.0196979 | 0.008 | 0.014678  | 0.093978  |
|    | 18 | −0.0842500* | 0.0196979 | 0.000 | −0.123900 | −0.044600 |
|    | 19 | −0.1703833* | 0.0196979 | 0.000 | −0.210033 | −0.130733 |
|    | 20 | −0.0056167  | 0.0196979 | 0.777 | −0.045267 | 0.034033  |
|    | 21 | −0.1460500* | 0.0196979 | 0.000 | −0.185700 | −0.106400 |
|    | 22 | −0.2584000* | 0.0196979 | 0.000 | −0.298050 | −0.218750 |
|    | 23 | −0.9606500* | 0.0196979 | 0.000 | −1.000300 | −0.921000 |
| 13 | 1  | 0.0337000   | 0.0196979 | 0.094 | −0.005950 | 0.073350  |
|    | 2  | 0.0000000   | 0.0196979 | 1.000 | −0.039650 | 0.039650  |
|    | 3  | 0.0599000*  | 0.0196979 | 0.004 | 0.020250  | 0.099550  |
|    | 4  | −0.0337000  | 0.0196979 | 0.094 | −0.073350 | 0.005950  |
|    | 5  | 0.0674000*  | 0.0196979 | 0.001 | 0.027750  | 0.107050  |
|    | 6  | 0.0561500*  | 0.0196979 | 0.007 | 0.016500  | 0.095800  |
|    | 7  | −0.0524333* | 0.0196979 | 0.011 | −0.092083 | −0.012783 |
|    | 8  | 0.0618000*  | 0.0196979 | 0.003 | 0.022150  | 0.101450  |
|    | 9  | −0.0168500  | 0.0196979 | 0.397 | −0.056500 | 0.022800  |
|    | 10 | 0.0561500*  | 0.0196979 | 0.007 | 0.016500  | 0.095800  |
|    | 11 | 0.1460500*  | 0.0196979 | 0.000 | 0.106400  | 0.185700  |
|    | 12 | 0.1516500*  | 0.0196979 | 0.000 | 0.112000  | 0.191300  |
|    | 14 | 0.1423000*  | 0.0196979 | 0.000 | 0.102650  | 0.181950  |
|    | 15 | −0.0225000  | 0.0196979 | 0.259 | −0.062150 | 0.017150  |
|    | 16 | 0.0936000*  | 0.0196979 | 0.000 | 0.053950  | 0.133250  |
|    | 17 | 0.2059778*  | 0.0196979 | 0.000 | 0.166328  | 0.245628  |
|    | 18 | 0.0674000*  | 0.0196979 | 0.001 | 0.027750  | 0.107050  |
|    | 19 | −0.0187333  | 0.0196979 | 0.347 | −0.058383 | 0.020917  |

|    |    |             |           |       |           |           |
|----|----|-------------|-----------|-------|-----------|-----------|
|    | 20 | 0.1460333*  | 0.0196979 | 0.000 | 0.106383  | 0.185683  |
|    | 21 | 0.0056000   | 0.0196979 | 0.777 | −0.034050 | 0.045250  |
|    | 22 | −0.1067500* | 0.0196979 | 0.000 | −0.146400 | −0.067100 |
|    | 23 | −0.8090000* | 0.0196979 | 0.000 | −0.848650 | −0.769350 |
| 14 | 1  | −0.1086000* | 0.0196979 | 0.000 | −0.148250 | −0.068950 |
|    | 2  | −0.1423000* | 0.0196979 | 0.000 | −0.181950 | −0.102650 |
|    | 3  | −0.0824000* | 0.0196979 | 0.000 | −0.122050 | −0.042750 |
|    | 4  | −0.1760000* | 0.0196979 | 0.000 | −0.215650 | −0.136350 |
|    | 5  | −0.0749000* | 0.0196979 | 0.000 | −0.114550 | −0.035250 |
|    | 6  | −0.0861500* | 0.0196979 | 0.000 | −0.125800 | −0.046500 |
|    | 7  | −0.1947333* | 0.0196979 | 0.000 | −0.234383 | −0.155083 |
|    | 8  | −0.0805000* | 0.0196979 | 0.000 | −0.120150 | −0.040850 |
|    | 9  | −0.1591500* | 0.0196979 | 0.000 | −0.198800 | −0.119500 |
|    | 10 | −0.0861500* | 0.0196979 | 0.000 | −0.125800 | −0.046500 |
|    | 11 | 0.0037500   | 0.0196979 | 0.850 | −0.035900 | 0.043400  |
|    | 12 | 0.0093500   | 0.0196979 | 0.637 | −0.030300 | 0.049000  |
|    | 13 | −0.1423000* | 0.0196979 | 0.000 | −0.181950 | −0.102650 |
|    | 15 | −0.1648000* | 0.0196979 | 0.000 | −0.204450 | −0.125150 |
|    | 16 | −0.0487000* | 0.0196979 | 0.017 | −0.088350 | −0.009050 |
|    | 17 | 0.0636778*  | 0.0196979 | 0.002 | 0.024028  | 0.103328  |
|    | 18 | −0.0749000* | 0.0196979 | 0.000 | −0.114550 | −0.035250 |
|    | 19 | −0.1610333* | 0.0196979 | 0.000 | −0.200683 | −0.121383 |
|    | 20 | 0.0037333   | 0.0196979 | 0.851 | −0.035917 | 0.043383  |
|    | 21 | −0.1367000* | 0.0196979 | 0.000 | −0.176350 | −0.097050 |
|    | 22 | −0.2490500* | 0.0196979 | 0.000 | −0.288700 | −0.209400 |
|    | 23 | −0.9513000* | 0.0196979 | 0.000 | −0.990950 | −0.911650 |
| 15 | 1  | 0.0562000*  | 0.0196979 | 0.006 | 0.016550  | 0.095850  |
|    | 2  | 0.0225000   | 0.0196979 | 0.259 | −0.017150 | 0.062150  |
|    | 3  | 0.0824000*  | 0.0196979 | 0.000 | 0.042750  | 0.122050  |
|    | 4  | −0.0112000  | 0.0196979 | 0.572 | −0.050850 | 0.028450  |
|    | 5  | 0.0899000*  | 0.0196979 | 0.000 | 0.050250  | 0.129550  |
|    | 6  | 0.0786500*  | 0.0196979 | 0.000 | 0.039000  | 0.118300  |
|    | 7  | −0.0299333  | 0.0196979 | 0.135 | −0.069583 | 0.009717  |
|    | 8  | 0.0843000*  | 0.0196979 | 0.000 | 0.044650  | 0.123950  |
|    | 9  | 0.0056500   | 0.0196979 | 0.776 | −0.034000 | 0.045300  |
|    | 10 | 0.0786500*  | 0.0196979 | 0.000 | 0.039000  | 0.118300  |
|    | 11 | 0.1685500*  | 0.0196979 | 0.000 | 0.128900  | 0.208200  |
|    | 12 | 0.1741500*  | 0.0196979 | 0.000 | 0.134500  | 0.213800  |
|    | 13 | 0.0225000   | 0.0196979 | 0.259 | −0.017150 | 0.062150  |
|    | 14 | 0.1648000*  | 0.0196979 | 0.000 | 0.125150  | 0.204450  |
|    | 16 | 0.1161000*  | 0.0196979 | 0.000 | 0.076450  | 0.155750  |

|    |    |             |           |       |           |           |
|----|----|-------------|-----------|-------|-----------|-----------|
|    | 17 | 0.2284778*  | 0.0196979 | 0.000 | 0.188828  | 0.268128  |
|    | 18 | 0.0899000*  | 0.0196979 | 0.000 | 0.050250  | 0.129550  |
|    | 19 | 0.0037667   | 0.0196979 | 0.849 | −0.035883 | 0.043417  |
|    | 20 | 0.1685333*  | 0.0196979 | 0.000 | 0.128883  | 0.208183  |
|    | 21 | 0.0281000   | 0.0196979 | 0.160 | −0.011550 | 0.067750  |
|    | 22 | −0.0842500* | 0.0196979 | 0.000 | −0.123900 | −0.044600 |
|    | 23 | −0.7865000* | 0.0196979 | 0.000 | −0.826150 | −0.746850 |
| 16 | 1  | −0.0599000* | 0.0196979 | 0.004 | −0.099550 | −0.020250 |
|    | 2  | −0.0936000* | 0.0196979 | 0.000 | −0.133250 | −0.053950 |
|    | 3  | −0.0337000  | 0.0196979 | 0.094 | −0.073350 | 0.005950  |
|    | 4  | −0.1273000* | 0.0196979 | 0.000 | −0.166950 | −0.087650 |
|    | 5  | −0.0262000  | 0.0196979 | 0.190 | −0.065850 | 0.013450  |
|    | 6  | −0.0374500  | 0.0196979 | 0.064 | −0.077100 | 0.002200  |
|    | 7  | −0.1460333* | 0.0196979 | 0.000 | −0.185683 | −0.106383 |
|    | 8  | −0.0318000  | 0.0196979 | 0.113 | −0.071450 | 0.007850  |
|    | 9  | −0.1104500* | 0.0196979 | 0.000 | −0.150100 | −0.070800 |
|    | 10 | −0.0374500  | 0.0196979 | 0.064 | −0.077100 | 0.002200  |
|    | 11 | 0.0524500*  | 0.0196979 | 0.011 | 0.012800  | 0.092100  |
|    | 12 | 0.0580500*  | 0.0196979 | 0.005 | 0.018400  | 0.097700  |
|    | 13 | −0.0936000* | 0.0196979 | 0.000 | −0.133250 | −0.053950 |
|    | 14 | 0.0487000*  | 0.0196979 | 0.017 | 0.009050  | 0.088350  |
|    | 15 | −0.1161000* | 0.0196979 | 0.000 | −0.155750 | −0.076450 |
|    | 17 | 0.1123778*  | 0.0196979 | 0.000 | 0.072728  | 0.152028  |
|    | 18 | −0.0262000  | 0.0196979 | 0.190 | −0.065850 | 0.013450  |
|    | 19 | −0.1123333* | 0.0196979 | 0.000 | −0.151983 | −0.072683 |
|    | 20 | 0.0524333*  | 0.0196979 | 0.011 | 0.012783  | 0.092083  |
|    | 21 | −0.0880000* | 0.0196979 | 0.000 | −0.127650 | −0.048350 |
|    | 22 | −0.2003500* | 0.0196979 | 0.000 | −0.240000 | −0.160700 |
|    | 23 | −0.9026000* | 0.0196979 | 0.000 | −0.942250 | −0.862950 |
| 17 | 1  | −0.1722778* | 0.0196979 | 0.000 | −0.211928 | −0.132628 |
|    | 2  | −0.2059778* | 0.0196979 | 0.000 | −0.245628 | −0.166328 |
|    | 3  | −0.1460778* | 0.0196979 | 0.000 | −0.185728 | −0.106428 |
|    | 4  | −0.2396778* | 0.0196979 | 0.000 | −0.279328 | −0.200028 |
|    | 5  | −0.1385778* | 0.0196979 | 0.000 | −0.178228 | −0.098928 |
|    | 6  | −0.1498278* | 0.0196979 | 0.000 | −0.189478 | −0.110178 |
|    | 7  | −0.2584111* | 0.0196979 | 0.000 | −0.298061 | −0.218761 |
|    | 8  | −0.1441778* | 0.0196979 | 0.000 | −0.183828 | −0.104528 |
|    | 9  | −0.2228278* | 0.0196979 | 0.000 | −0.262478 | −0.183178 |
|    | 10 | −0.1498278* | 0.0196979 | 0.000 | −0.189478 | −0.110178 |
|    | 11 | −0.0599278* | 0.0196979 | 0.004 | −0.099578 | −0.020278 |
|    | 12 | −0.0543278* | 0.0196979 | 0.008 | −0.093978 | −0.014678 |

|    |    |             |           |       |           |           |
|----|----|-------------|-----------|-------|-----------|-----------|
|    | 13 | −0.2059778* | 0.0196979 | 0.000 | −0.245628 | −0.166328 |
|    | 14 | −0.0636778* | 0.0196979 | 0.002 | −0.103328 | −0.024028 |
|    | 15 | −0.2284778* | 0.0196979 | 0.000 | −0.268128 | −0.188828 |
|    | 16 | −0.1123778* | 0.0196979 | 0.000 | −0.152028 | −0.072728 |
|    | 18 | −0.1385778* | 0.0196979 | 0.000 | −0.178228 | −0.098928 |
|    | 19 | −0.2247111* | 0.0196979 | 0.000 | −0.264361 | −0.185061 |
|    | 20 | −0.0599444* | 0.0196979 | 0.004 | −0.099594 | −0.020295 |
|    | 21 | −0.2003778* | 0.0196979 | 0.000 | −0.240028 | −0.160728 |
|    | 22 | −0.3127278* | 0.0196979 | 0.000 | −0.352378 | −0.273078 |
|    | 23 | −1.0149778* | 0.0196979 | 0.000 | −1.054628 | −0.975328 |
| 18 | 1  | −0.0337000  | 0.0196979 | 0.094 | −0.073350 | 0.005950  |
|    | 2  | −0.0674000* | 0.0196979 | 0.001 | −0.107050 | −0.027750 |
|    | 3  | −0.0075000  | 0.0196979 | 0.705 | −0.047150 | 0.032150  |
|    | 4  | −0.1011000* | 0.0196979 | 0.000 | −0.140750 | −0.061450 |
|    | 5  | 0.0000000   | 0.0196979 | 1.000 | −0.039650 | 0.039650  |
|    | 6  | −0.0112500  | 0.0196979 | 0.571 | −0.050900 | 0.028400  |
|    | 7  | −0.1198333* | 0.0196979 | 0.000 | −0.159483 | −0.080183 |
|    | 8  | −0.0056000  | 0.0196979 | 0.777 | −0.045250 | 0.034050  |
|    | 9  | −0.0842500* | 0.0196979 | 0.000 | −0.123900 | −0.044600 |
|    | 10 | −0.0112500  | 0.0196979 | 0.571 | −0.050900 | 0.028400  |
|    | 11 | 0.0786500*  | 0.0196979 | 0.000 | 0.039000  | 0.118300  |
|    | 12 | 0.0842500*  | 0.0196979 | 0.000 | 0.044600  | 0.123900  |
|    | 13 | −0.0674000* | 0.0196979 | 0.001 | −0.107050 | −0.027750 |
|    | 14 | 0.0749000*  | 0.0196979 | 0.000 | 0.035250  | 0.114550  |
|    | 15 | −0.0899000* | 0.0196979 | 0.000 | −0.129550 | −0.050250 |
|    | 16 | 0.0262000   | 0.0196979 | 0.190 | −0.013450 | 0.065850  |
|    | 17 | 0.1385778*  | 0.0196979 | 0.000 | 0.098928  | 0.178228  |
|    | 19 | −0.0861333* | 0.0196979 | 0.000 | −0.125783 | −0.046483 |
|    | 20 | 0.0786333*  | 0.0196979 | 0.000 | 0.038983  | 0.118283  |
|    | 21 | −0.0618000* | 0.0196979 | 0.003 | −0.101450 | −0.022150 |
|    | 22 | −0.1741500* | 0.0196979 | 0.000 | −0.213800 | −0.134500 |
|    | 23 | −0.8764000* | 0.0196979 | 0.000 | −0.916050 | −0.836750 |
| 19 | 1  | 0.0524333*  | 0.0196979 | 0.011 | 0.012783  | 0.092083  |
|    | 2  | 0.0187333   | 0.0196979 | 0.347 | −0.020917 | 0.058383  |
|    | 3  | 0.0786333*  | 0.0196979 | 0.000 | 0.038983  | 0.118283  |
|    | 4  | −0.0149667  | 0.0196979 | 0.451 | −0.054617 | 0.024683  |
|    | 5  | 0.0861333*  | 0.0196979 | 0.000 | 0.046483  | 0.125783  |
|    | 6  | 0.0748833*  | 0.0196979 | 0.000 | 0.035233  | 0.114533  |
|    | 7  | −0.0337000  | 0.0196979 | 0.094 | −0.073350 | 0.005950  |
|    | 8  | 0.0805333*  | 0.0196979 | 0.000 | 0.040883  | 0.120183  |
|    | 9  | 0.0018833   | 0.0196979 | 0.924 | −0.037767 | 0.041533  |

|    |    |             |             |           |           |           |
|----|----|-------------|-------------|-----------|-----------|-----------|
|    | 10 | 0.0748833*  | 0.0196979   | 0.000     | 0.035233  | 0.114533  |
|    | 11 | 0.1647833*  | 0.0196979   | 0.000     | 0.125133  | 0.204433  |
|    | 12 | 0.1703833*  | 0.0196979   | 0.000     | 0.130733  | 0.210033  |
|    | 13 | 0.0187333   | 0.0196979   | 0.347     | −0.020917 | 0.058383  |
|    | 14 | 0.1610333*  | 0.0196979   | 0.000     | 0.121383  | 0.200683  |
|    | 15 | −0.0037667  | 0.0196979   | 0.849     | −0.043417 | 0.035883  |
|    | 16 | 0.1123333*  | 0.0196979   | 0.000     | 0.072683  | 0.151983  |
|    | 17 | 0.2247111*  | 0.0196979   | 0.000     | 0.185061  | 0.264361  |
|    | 18 | 0.0861333*  | 0.0196979   | 0.000     | 0.046483  | 0.125783  |
|    | 20 | 0.1647667*  | 0.0196979   | 0.000     | 0.125117  | 0.204417  |
|    | 21 | 0.0243333   | 0.0196979   | 0.223     | −0.015317 | 0.063983  |
|    | 22 | −0.0880167* | 0.0196979   | 0.000     | −0.127667 | −0.048367 |
|    | 23 | −0.7902667* | 0.0196979   | 0.000     | −0.829917 | −0.750617 |
|    | 20 | 1           | −0.1123333* | 0.0196979 | 0.000     | −0.151983 |
| 2  |    | −0.1460333* | 0.0196979   | 0.000     | −0.185683 | −0.106383 |
| 3  |    | −0.0861333* | 0.0196979   | 0.000     | −0.125783 | −0.046483 |
| 4  |    | −0.1797333* | 0.0196979   | 0.000     | −0.219383 | −0.140083 |
| 5  |    | −0.0786333* | 0.0196979   | 0.000     | −0.118283 | −0.038983 |
| 6  |    | −0.0898833* | 0.0196979   | 0.000     | −0.129533 | −0.050233 |
| 7  |    | −0.1984667* | 0.0196979   | 0.000     | −0.238117 | −0.158817 |
| 8  |    | −0.0842333* | 0.0196979   | 0.000     | −0.123883 | −0.044583 |
| 9  |    | −0.1628833* | 0.0196979   | 0.000     | −0.202533 | −0.123233 |
| 10 |    | −0.0898833* | 0.0196979   | 0.000     | −0.129533 | −0.050233 |
| 11 |    | 0.0000167   | 0.0196979   | 0.999     | −0.039633 | 0.039667  |
| 12 |    | 0.0056167   | 0.0196979   | 0.777     | −0.034033 | 0.045267  |
| 13 |    | −0.1460333* | 0.0196979   | 0.000     | −0.185683 | −0.106383 |
| 14 |    | −0.0037333  | 0.0196979   | 0.851     | −0.043383 | 0.035917  |
| 15 |    | −0.1685333* | 0.0196979   | 0.000     | −0.208183 | −0.128883 |
| 16 |    | −0.0524333* | 0.0196979   | 0.011     | −0.092083 | −0.012783 |
| 17 |    | 0.0599444*  | 0.0196979   | 0.004     | 0.020295  | 0.099594  |
| 18 |    | −0.0786333* | 0.0196979   | 0.000     | −0.118283 | −0.038983 |
| 19 |    | −0.1647667* | 0.0196979   | 0.000     | −0.204417 | −0.125117 |
| 21 |    | −0.1404333* | 0.0196979   | 0.000     | −0.180083 | −0.100783 |
| 22 |    | −0.2527833* | 0.0196979   | 0.000     | −0.292433 | −0.213133 |
| 23 |    | −0.9550333* | 0.0196979   | 0.000     | −0.994683 | −0.915383 |
| 21 |    | 1           | 0.0281000   | 0.0196979 | 0.160     | −0.011550 |
|    | 2  | −0.0056000  | 0.0196979   | 0.777     | −0.045250 | 0.034050  |
|    | 3  | 0.0543000*  | 0.0196979   | 0.008     | 0.014650  | 0.093950  |
|    | 4  | −0.0393000  | 0.0196979   | 0.052     | −0.078950 | 0.000350  |
|    | 5  | 0.0618000*  | 0.0196979   | 0.003     | 0.022150  | 0.101450  |
|    | 6  | 0.0505500*  | 0.0196979   | 0.014     | 0.010900  | 0.090200  |

|    |    |             |           |       |           |           |
|----|----|-------------|-----------|-------|-----------|-----------|
|    | 7  | −0.0580333* | 0.0196979 | 0.005 | −0.097683 | −0.018383 |
|    | 8  | 0.0562000*  | 0.0196979 | 0.006 | 0.016550  | 0.095850  |
|    | 9  | −0.0224500  | 0.0196979 | 0.260 | −0.062100 | 0.017200  |
|    | 10 | 0.0505500*  | 0.0196979 | 0.014 | 0.010900  | 0.090200  |
|    | 11 | 0.1404500*  | 0.0196979 | 0.000 | 0.100800  | 0.180100  |
|    | 12 | 0.1460500*  | 0.0196979 | 0.000 | 0.106400  | 0.185700  |
|    | 13 | −0.0056000  | 0.0196979 | 0.777 | −0.045250 | 0.034050  |
|    | 14 | 0.1367000*  | 0.0196979 | 0.000 | 0.097050  | 0.176350  |
|    | 15 | −0.0281000  | 0.0196979 | 0.160 | −0.067750 | 0.011550  |
|    | 16 | 0.0880000*  | 0.0196979 | 0.000 | 0.048350  | 0.127650  |
|    | 17 | 0.2003778*  | 0.0196979 | 0.000 | 0.160728  | 0.240028  |
|    | 18 | 0.0618000*  | 0.0196979 | 0.003 | 0.022150  | 0.101450  |
|    | 19 | −0.0243333  | 0.0196979 | 0.223 | −0.063983 | 0.015317  |
|    | 20 | 0.1404333*  | 0.0196979 | 0.000 | 0.100783  | 0.180083  |
|    | 22 | −0.1123500* | 0.0196979 | 0.000 | −0.152000 | −0.072700 |
|    | 23 | −0.8146000* | 0.0196979 | 0.000 | −0.854250 | −0.774950 |
| 22 | 1  | 0.1404500*  | 0.0196979 | 0.000 | 0.100800  | 0.180100  |
|    | 2  | 0.1067500*  | 0.0196979 | 0.000 | 0.067100  | 0.146400  |
|    | 3  | 0.1666500*  | 0.0196979 | 0.000 | 0.127000  | 0.206300  |
|    | 4  | 0.0730500*  | 0.0196979 | 0.001 | 0.033400  | 0.112700  |
|    | 5  | 0.1741500*  | 0.0196979 | 0.000 | 0.134500  | 0.213800  |
|    | 6  | 0.1629000*  | 0.0196979 | 0.000 | 0.123250  | 0.202550  |
|    | 7  | 0.0543167*  | 0.0196979 | 0.008 | 0.014667  | 0.093967  |
|    | 8  | 0.1685500*  | 0.0196979 | 0.000 | 0.128900  | 0.208200  |
|    | 9  | 0.0899000*  | 0.0196979 | 0.000 | 0.050250  | 0.129550  |
|    | 10 | 0.1629000*  | 0.0196979 | 0.000 | 0.123250  | 0.202550  |
|    | 11 | 0.2528000*  | 0.0196979 | 0.000 | 0.213150  | 0.292450  |
|    | 12 | 0.2584000*  | 0.0196979 | 0.000 | 0.218750  | 0.298050  |
|    | 13 | 0.1067500*  | 0.0196979 | 0.000 | 0.067100  | 0.146400  |
|    | 14 | 0.2490500*  | 0.0196979 | 0.000 | 0.209400  | 0.288700  |
|    | 15 | 0.0842500*  | 0.0196979 | 0.000 | 0.044600  | 0.123900  |
|    | 16 | 0.2003500*  | 0.0196979 | 0.000 | 0.160700  | 0.240000  |
|    | 17 | 0.3127278*  | 0.0196979 | 0.000 | 0.273078  | 0.352378  |
|    | 18 | 0.1741500*  | 0.0196979 | 0.000 | 0.134500  | 0.213800  |
|    | 19 | 0.0880167*  | 0.0196979 | 0.000 | 0.048367  | 0.127667  |
|    | 20 | 0.2527833*  | 0.0196979 | 0.000 | 0.213133  | 0.292433  |
|    | 21 | 0.1123500*  | 0.0196979 | 0.000 | 0.072700  | 0.152000  |
|    | 23 | −0.7022500* | 0.0196979 | 0.000 | −0.741900 | −0.662600 |
| 23 | 1  | 0.8427000*  | 0.0196979 | 0.000 | 0.803050  | 0.882350  |
|    | 2  | 0.8090000*  | 0.0196979 | 0.000 | 0.769350  | 0.848650  |
|    | 3  | 0.8689000*  | 0.0196979 | 0.000 | 0.829250  | 0.908550  |



|    |            |           |       |          |          |
|----|------------|-----------|-------|----------|----------|
| 4  | 0.7753000* | 0.0196979 | 0.000 | 0.735650 | 0.814950 |
| 5  | 0.8764000* | 0.0196979 | 0.000 | 0.836750 | 0.916050 |
| 6  | 0.8651500* | 0.0196979 | 0.000 | 0.825500 | 0.904800 |
| 7  | 0.7565667* | 0.0196979 | 0.000 | 0.716917 | 0.796217 |
| 8  | 0.8708000* | 0.0196979 | 0.000 | 0.831150 | 0.910450 |
| 9  | 0.7921500* | 0.0196979 | 0.000 | 0.752500 | 0.831800 |
| 10 | 0.8651500* | 0.0196979 | 0.000 | 0.825500 | 0.904800 |
| 11 | 0.9550500* | 0.0196979 | 0.000 | 0.915400 | 0.994700 |
| 12 | 0.9606500* | 0.0196979 | 0.000 | 0.921000 | 1.000300 |
| 13 | 0.8090000* | 0.0196979 | 0.000 | 0.769350 | 0.848650 |
| 14 | 0.9513000* | 0.0196979 | 0.000 | 0.911650 | 0.990950 |
| 15 | 0.7865000* | 0.0196979 | 0.000 | 0.746850 | 0.826150 |
| 16 | 0.9026000* | 0.0196979 | 0.000 | 0.862950 | 0.942250 |
| 17 | 1.0149778* | 0.0196979 | 0.000 | 0.975328 | 1.054628 |
| 18 | 0.8764000* | 0.0196979 | 0.000 | 0.836750 | 0.916050 |
| 19 | 0.7902667* | 0.0196979 | 0.000 | 0.750617 | 0.829917 |
| 20 | 0.9550333* | 0.0196979 | 0.000 | 0.915383 | 0.994683 |
| 21 | 0.8146000* | 0.0196979 | 0.000 | 0.774950 | 0.854250 |
| 22 | 0.7022500* | 0.0196979 | 0.000 | 0.662600 | 0.741900 |

\*. The mean difference is significant at the 0.05 level.

**Table S3.** One-way ANOVA method was employed for statistical analysis of the inhibitions of 23 treatments on the pathogen *Villosicalva virens* P1. Nos. 1-22 were EtOAc extracts of endophytes and No. 23 was the positive control carbendazim.

| Descriptives |      |                |            |                                  |             |          |
|--------------|------|----------------|------------|----------------------------------|-------------|----------|
| Inhibition   |      |                |            |                                  |             |          |
| N            | Mean | Std. Deviation | Std. Error | 95% Confidence Interval for Mean |             |          |
|              |      |                |            | Lower Bound                      | Upper Bound |          |
| 1            | 3    | 0.066467       | 0.0208725  | 0.0120508                        | 0.118317    |          |
| 2            | 3    | 0.285100       | 0.0157617  | 0.0091000                        | 0.324254    |          |
| 3            | 3    | 0.057400       | 0.0361523  | 0.0208725                        | 0.147207    |          |
| 4            | 3    | 0.303267       | 0.0136500  | 0.0078808                        | 0.337175    |          |
| 5            | 3    | 0.025500       | 0.0208835  | 0.0120571                        | 0.077377    |          |
| 6            | 3    | 0.403500       | 0.0439253  | 0.0253603                        | 0.512616    |          |
| 7            | 3    | 0.508167       | 0.0236714  | 0.0136667                        | 0.566970    |          |
| 8            | 3    | 0.023250       | 0.0068500  | 0.0039548                        | 0.040266    |          |
| 9            | 3    | 0.360500       | 0.0640204  | 0.0369622                        | 0.519535    |          |
| 10           | 3    | 0.162133       | 0.0687565  | 0.0396966                        | 0.332934    |          |
| 11           | 3    | 0.289600       | 0.0273000  | 0.0157617                        | 0.357417    |          |
| 12           | 3    | 0.275967       | 0.0361334  | 0.0208616                        | 0.365727    |          |
| 13           | 3    | 0.310100       | 0.0205000  | 0.0118357                        | 0.361025    |          |
| 14           | 3    | 0.256850       | 0.1284500  | 0.0741606                        | 0.575937    |          |
| 15           | 3    | 0.057350       | 0.0136500  | 0.0078808                        | 0.091258    |          |
| 16           | 3    | 0.143900       | 0.0208835  | 0.0120571                        | 0.195777    |          |
| 17           | 3    | 0.166633       | 0.0236714  | 0.0136667                        | 0.225436    |          |
| 18           | 3    | 0.248633       | 0.0492435  | 0.0284308                        | 0.370961    |          |
| 19           | 3    | 0.133850       | 0.0054500  | 0.0031466                        | 0.147389    |          |
| 20           | 3    | 0.112033       | 0.0626285  | 0.0361586                        | 0.267611    |          |
| 21           | 3    | 0.235000       | 0.0273000  | 0.0157617                        | 0.302817    |          |
| 22           | 3    | 0.098367       | 0.0546500  | 0.0315522                        | 0.234125    |          |
| 23           | 3    | 1.000000       | 0.0000000  | 0.0000000                        | 1.000000    |          |
| Total        | 69   | 0.240155       | 0.2093623  | 0.0252043                        | 0.189861    | 0.290449 |

| Descriptives |         |         |
|--------------|---------|---------|
| Inhibition   |         |         |
|              | Minimum | Maximum |
| 1            | 0.0437  | 0.0847  |

|       |        |        |
|-------|--------|--------|
| 2     | 0.2760 | 0.3033 |
| 3     | 0.0301 | 0.0984 |
| 4     | 0.2896 | 0.3169 |
| 5     | 0.0027 | 0.0437 |
| 6     | 0.3716 | 0.4536 |
| 7     | 0.4945 | 0.5355 |
| 8     | 0.0164 | 0.0301 |
| 9     | 0.3169 | 0.4340 |
| 10    | 0.0984 | 0.2350 |
| 11    | 0.2623 | 0.3169 |
| 12    | 0.2350 | 0.3033 |
| 13    | 0.2896 | 0.3306 |
| 14    | 0.1284 | 0.3853 |
| 15    | 0.0437 | 0.0710 |
| 16    | 0.1257 | 0.1667 |
| 17    | 0.1393 | 0.1803 |
| 18    | 0.1940 | 0.2896 |
| 19    | 0.1284 | 0.1393 |
| 20    | 0.0437 | 0.1667 |
| 21    | 0.2077 | 0.2623 |
| 22    | 0.0437 | 0.1530 |
| 23    | 1.0000 | 1.0000 |
| Total | 0.0027 | 1.0000 |

### Test of Homogeneity of Variances

|            |                                      | Levene Statistic | df1 | df2    | Sig.  |
|------------|--------------------------------------|------------------|-----|--------|-------|
| Inhibition | Based on Mean                        | 2.322            | 22  | 46     | 0.008 |
|            | Based on Median                      | 1.207            | 22  | 46     | 0.288 |
|            | Based on Median and with adjusted df | 1.207            | 22  | 15.107 | 0.359 |
|            | Based on trimmed mean                | 2.249            | 22  | 46     | 0.010 |

### ANOVA

| Inhibition     |                |    |             |        |       |
|----------------|----------------|----|-------------|--------|-------|
|                | Sum of Squares | df | Mean Square | F      | Sig.  |
| Between Groups | 2.892          | 22 | 0.131       | 68.348 | 0.000 |
| Within Groups  | 0.088          | 46 | 0.002       |        |       |
| Total          | 2.981          | 68 |             |        |       |

## Post Hoc Tests

**Multiple Comparisons**

Dependent Variable: Inhibition

LSD

| (I) Strains | (J) Strains | Mean Difference<br>(I-J) | Std. Error | Sig.  | 95% Confidence Interval |             |
|-------------|-------------|--------------------------|------------|-------|-------------------------|-------------|
|             |             |                          |            |       | Lower Bound             | Upper Bound |
| 1           | 2           | -0.2186333*              | 0.0358089  | 0.000 | -0.290713               | -0.146554   |
|             | 3           | 0.0090667                | 0.0358089  | 0.801 | -0.063013               | 0.081146    |
|             | 4           | -0.2368000*              | 0.0358089  | 0.000 | -0.308880               | -0.164720   |
|             | 5           | 0.0409667                | 0.0358089  | 0.259 | -0.031113               | 0.113046    |
|             | 6           | -0.3370333*              | 0.0358089  | 0.000 | -0.409113               | -0.264954   |
|             | 7           | -0.4417000*              | 0.0358089  | 0.000 | -0.513780               | -0.369620   |
|             | 8           | 0.0432167                | 0.0358089  | 0.234 | -0.028863               | 0.115296    |
|             | 9           | -0.2940333*              | 0.0358089  | 0.000 | -0.366113               | -0.221954   |
|             | 10          | -0.0956667*              | 0.0358089  | 0.010 | -0.167746               | -0.023587   |
|             | 11          | -0.2231333*              | 0.0358089  | 0.000 | -0.295213               | -0.151054   |
|             | 12          | -0.2095000*              | 0.0358089  | 0.000 | -0.281580               | -0.137420   |
|             | 13          | -0.2436333*              | 0.0358089  | 0.000 | -0.315713               | -0.171554   |
|             | 14          | -0.1903833*              | 0.0358089  | 0.000 | -0.262463               | -0.118304   |
|             | 15          | 0.0091167                | 0.0358089  | 0.800 | -0.062963               | 0.081196    |
|             | 16          | -0.0774333*              | 0.0358089  | 0.036 | -0.149513               | -0.005354   |
|             | 17          | -0.1001667*              | 0.0358089  | 0.008 | -0.172246               | -0.028087   |
|             | 18          | -0.1821667*              | 0.0358089  | 0.000 | -0.254246               | -0.110087   |
|             | 19          | -0.0673833               | 0.0358089  | 0.066 | -0.139463               | 0.004696    |
|             | 20          | -0.0455667               | 0.0358089  | 0.210 | -0.117646               | 0.026513    |
|             | 21          | -0.1685333*              | 0.0358089  | 0.000 | -0.240613               | -0.096454   |
|             | 22          | -0.0319000               | 0.0358089  | 0.378 | -0.103980               | 0.040180    |
|             | 23          | -0.9335333*              | 0.0358089  | 0.000 | -1.005613               | -0.861454   |
| 2           | 1           | 0.2186333*               | 0.0358089  | 0.000 | 0.146554                | 0.290713    |
|             | 3           | 0.2277000*               | 0.0358089  | 0.000 | 0.155620                | 0.299780    |
|             | 4           | -0.0181667               | 0.0358089  | 0.614 | -0.090246               | 0.053913    |
|             | 5           | 0.2596000*               | 0.0358089  | 0.000 | 0.187520                | 0.331680    |
|             | 6           | -0.1184000*              | 0.0358089  | 0.002 | -0.190480               | -0.046320   |
|             | 7           | -0.2230667*              | 0.0358089  | 0.000 | -0.295146               | -0.150987   |
|             | 8           | 0.2618500*               | 0.0358089  | 0.000 | 0.189770                | 0.333930    |
|             | 9           | -0.0754000*              | 0.0358089  | 0.041 | -0.147480               | -0.003320   |
|             | 10          | 0.1229667*               | 0.0358089  | 0.001 | 0.050887                | 0.195046    |
|             | 11          | -0.0045000               | 0.0358089  | 0.901 | -0.076580               | 0.067580    |

|   |    |             |           |       |           |           |
|---|----|-------------|-----------|-------|-----------|-----------|
|   | 12 | 0.0091333   | 0.0358089 | 0.800 | −0.062946 | 0.081213  |
|   | 13 | −0.0250000  | 0.0358089 | 0.489 | −0.097080 | 0.047080  |
|   | 14 | 0.0282500   | 0.0358089 | 0.434 | −0.043830 | 0.100330  |
|   | 15 | 0.2277500*  | 0.0358089 | 0.000 | 0.155670  | 0.299830  |
|   | 16 | 0.1412000*  | 0.0358089 | 0.000 | 0.069120  | 0.213280  |
|   | 17 | 0.1184667*  | 0.0358089 | 0.002 | 0.046387  | 0.190546  |
|   | 18 | 0.0364667   | 0.0358089 | 0.314 | −0.035613 | 0.108546  |
|   | 19 | 0.1512500*  | 0.0358089 | 0.000 | 0.079170  | 0.223330  |
|   | 20 | 0.1730667*  | 0.0358089 | 0.000 | 0.100987  | 0.245146  |
|   | 21 | 0.0501000   | 0.0358089 | 0.168 | −0.021980 | 0.122180  |
|   | 22 | 0.1867333*  | 0.0358089 | 0.000 | 0.114654  | 0.258813  |
|   | 23 | −0.7149000* | 0.0358089 | 0.000 | −0.786980 | −0.642820 |
| 3 | 1  | −0.0090667  | 0.0358089 | 0.801 | −0.081146 | 0.063013  |
|   | 2  | −0.2277000* | 0.0358089 | 0.000 | −0.299780 | −0.155620 |
|   | 4  | −0.2458667* | 0.0358089 | 0.000 | −0.317946 | −0.173787 |
|   | 5  | 0.0319000   | 0.0358089 | 0.378 | −0.040180 | 0.103980  |
|   | 6  | −0.3461000* | 0.0358089 | 0.000 | −0.418180 | −0.274020 |
|   | 7  | −0.4507667* | 0.0358089 | 0.000 | −0.522846 | −0.378687 |
|   | 8  | 0.0341500   | 0.0358089 | 0.345 | −0.037930 | 0.106230  |
|   | 9  | −0.3031000* | 0.0358089 | 0.000 | −0.375180 | −0.231020 |
|   | 10 | −0.1047333* | 0.0358089 | 0.005 | −0.176813 | −0.032654 |
|   | 11 | −0.2322000* | 0.0358089 | 0.000 | −0.304280 | −0.160120 |
|   | 12 | −0.2185667* | 0.0358089 | 0.000 | −0.290646 | −0.146487 |
|   | 13 | −0.2527000* | 0.0358089 | 0.000 | −0.324780 | −0.180620 |
|   | 14 | −0.1994500* | 0.0358089 | 0.000 | −0.271530 | −0.127370 |
|   | 15 | 0.0000500   | 0.0358089 | 0.999 | −0.072030 | 0.072130  |
|   | 16 | −0.0865000* | 0.0358089 | 0.020 | −0.158580 | −0.014420 |
|   | 17 | −0.1092333* | 0.0358089 | 0.004 | −0.181313 | −0.037154 |
|   | 18 | −0.1912333* | 0.0358089 | 0.000 | −0.263313 | −0.119154 |
|   | 19 | −0.0764500* | 0.0358089 | 0.038 | −0.148530 | −0.004370 |
|   | 20 | −0.0546333  | 0.0358089 | 0.134 | −0.126713 | 0.017446  |
|   | 21 | −0.1776000* | 0.0358089 | 0.000 | −0.249680 | −0.105520 |
|   | 22 | −0.0409667  | 0.0358089 | 0.259 | −0.113046 | 0.031113  |
|   | 23 | −0.9426000* | 0.0358089 | 0.000 | −1.014680 | −0.870520 |
| 4 | 1  | 0.2368000*  | 0.0358089 | 0.000 | 0.164720  | 0.308880  |
|   | 2  | 0.0181667   | 0.0358089 | 0.614 | −0.053913 | 0.090246  |
|   | 3  | 0.2458667*  | 0.0358089 | 0.000 | 0.173787  | 0.317946  |
|   | 5  | 0.2777667*  | 0.0358089 | 0.000 | 0.205687  | 0.349846  |
|   | 6  | −0.1002333* | 0.0358089 | 0.007 | −0.172313 | −0.028154 |
|   | 7  | −0.2049000* | 0.0358089 | 0.000 | −0.276980 | −0.132820 |
|   | 8  | 0.2800167*  | 0.0358089 | 0.000 | 0.207937  | 0.352096  |

|   |    |             |           |       |           |           |
|---|----|-------------|-----------|-------|-----------|-----------|
|   | 9  | −0.0572333  | 0.0358089 | 0.117 | −0.129313 | 0.014846  |
|   | 10 | 0.1411333*  | 0.0358089 | 0.000 | 0.069054  | 0.213213  |
|   | 11 | 0.0136667   | 0.0358089 | 0.704 | −0.058413 | 0.085746  |
|   | 12 | 0.0273000   | 0.0358089 | 0.450 | −0.044780 | 0.099380  |
|   | 13 | −0.0068333  | 0.0358089 | 0.850 | −0.078913 | 0.065246  |
|   | 14 | 0.0464167   | 0.0358089 | 0.201 | −0.025663 | 0.118496  |
|   | 15 | 0.2459167*  | 0.0358089 | 0.000 | 0.173837  | 0.317996  |
|   | 16 | 0.1593667*  | 0.0358089 | 0.000 | 0.087287  | 0.231446  |
|   | 17 | 0.1366333*  | 0.0358089 | 0.000 | 0.064554  | 0.208713  |
|   | 18 | 0.0546333   | 0.0358089 | 0.134 | −0.017446 | 0.126713  |
|   | 19 | 0.1694167*  | 0.0358089 | 0.000 | 0.097337  | 0.241496  |
|   | 20 | 0.1912333*  | 0.0358089 | 0.000 | 0.119154  | 0.263313  |
|   | 21 | 0.0682667   | 0.0358089 | 0.063 | −0.003813 | 0.140346  |
|   | 22 | 0.2049000*  | 0.0358089 | 0.000 | 0.132820  | 0.276980  |
|   | 23 | −0.6967333* | 0.0358089 | 0.000 | −0.768813 | −0.624654 |
| 5 | 1  | −0.0409667  | 0.0358089 | 0.259 | −0.113046 | 0.031113  |
|   | 2  | −0.2596000* | 0.0358089 | 0.000 | −0.331680 | −0.187520 |
|   | 3  | −0.0319000  | 0.0358089 | 0.378 | −0.103980 | 0.040180  |
|   | 4  | −0.2777667* | 0.0358089 | 0.000 | −0.349846 | −0.205687 |
|   | 6  | −0.3780000* | 0.0358089 | 0.000 | −0.450080 | −0.305920 |
|   | 7  | −0.4826667* | 0.0358089 | 0.000 | −0.554746 | −0.410587 |
|   | 8  | 0.0022500   | 0.0358089 | 0.950 | −0.069830 | 0.074330  |
|   | 9  | −0.3350000* | 0.0358089 | 0.000 | −0.407080 | −0.262920 |
|   | 10 | −0.1366333* | 0.0358089 | 0.000 | −0.208713 | −0.064554 |
|   | 11 | −0.2641000* | 0.0358089 | 0.000 | −0.336180 | −0.192020 |
|   | 12 | −0.2504667* | 0.0358089 | 0.000 | −0.322546 | −0.178387 |
|   | 13 | −0.2846000* | 0.0358089 | 0.000 | −0.356680 | −0.212520 |
|   | 14 | −0.2313500* | 0.0358089 | 0.000 | −0.303430 | −0.159270 |
|   | 15 | −0.0318500  | 0.0358089 | 0.378 | −0.103930 | 0.040230  |
|   | 16 | −0.1184000* | 0.0358089 | 0.002 | −0.190480 | −0.046320 |
|   | 17 | −0.1411333* | 0.0358089 | 0.000 | −0.213213 | −0.069054 |
|   | 18 | −0.2231333* | 0.0358089 | 0.000 | −0.295213 | −0.151054 |
|   | 19 | −0.1083500* | 0.0358089 | 0.004 | −0.180430 | −0.036270 |
|   | 20 | −0.0865333* | 0.0358089 | 0.020 | −0.158613 | −0.014454 |
|   | 21 | −0.2095000* | 0.0358089 | 0.000 | −0.281580 | −0.137420 |
|   | 22 | −0.0728667* | 0.0358089 | 0.048 | −0.144946 | −0.000787 |
|   | 23 | −0.9745000* | 0.0358089 | 0.000 | −1.046580 | −0.902420 |
| 6 | 1  | 0.3370333*  | 0.0358089 | 0.000 | 0.264954  | 0.409113  |
|   | 2  | 0.1184000*  | 0.0358089 | 0.002 | 0.046320  | 0.190480  |
|   | 3  | 0.3461000*  | 0.0358089 | 0.000 | 0.274020  | 0.418180  |
|   | 4  | 0.1002333*  | 0.0358089 | 0.007 | 0.028154  | 0.172313  |

|   |    |             |           |       |           |           |
|---|----|-------------|-----------|-------|-----------|-----------|
|   | 5  | 0.3780000*  | 0.0358089 | 0.000 | 0.305920  | 0.450080  |
|   | 7  | −0.1046667* | 0.0358089 | 0.005 | −0.176746 | −0.032587 |
|   | 8  | 0.3802500*  | 0.0358089 | 0.000 | 0.308170  | 0.452330  |
|   | 9  | 0.0430000   | 0.0358089 | 0.236 | −0.029080 | 0.115080  |
|   | 10 | 0.2413667*  | 0.0358089 | 0.000 | 0.169287  | 0.313446  |
|   | 11 | 0.1139000*  | 0.0358089 | 0.003 | 0.041820  | 0.185980  |
|   | 12 | 0.1275333*  | 0.0358089 | 0.001 | 0.055454  | 0.199613  |
|   | 13 | 0.0934000*  | 0.0358089 | 0.012 | 0.021320  | 0.165480  |
|   | 14 | 0.1466500*  | 0.0358089 | 0.000 | 0.074570  | 0.218730  |
|   | 15 | 0.3461500*  | 0.0358089 | 0.000 | 0.274070  | 0.418230  |
|   | 16 | 0.2596000*  | 0.0358089 | 0.000 | 0.187520  | 0.331680  |
|   | 17 | 0.2368667*  | 0.0358089 | 0.000 | 0.164787  | 0.308946  |
|   | 18 | 0.1548667*  | 0.0358089 | 0.000 | 0.082787  | 0.226946  |
|   | 19 | 0.2696500*  | 0.0358089 | 0.000 | 0.197570  | 0.341730  |
|   | 20 | 0.2914667*  | 0.0358089 | 0.000 | 0.219387  | 0.363546  |
|   | 21 | 0.1685000*  | 0.0358089 | 0.000 | 0.096420  | 0.240580  |
|   | 22 | 0.3051333*  | 0.0358089 | 0.000 | 0.233054  | 0.377213  |
|   | 23 | −0.5965000* | 0.0358089 | 0.000 | −0.668580 | −0.524420 |
| 7 | 1  | 0.4417000*  | 0.0358089 | 0.000 | 0.369620  | 0.513780  |
|   | 2  | 0.2230667*  | 0.0358089 | 0.000 | 0.150987  | 0.295146  |
|   | 3  | 0.4507667*  | 0.0358089 | 0.000 | 0.378687  | 0.522846  |
|   | 4  | 0.2049000*  | 0.0358089 | 0.000 | 0.132820  | 0.276980  |
|   | 5  | 0.4826667*  | 0.0358089 | 0.000 | 0.410587  | 0.554746  |
|   | 6  | 0.1046667*  | 0.0358089 | 0.005 | 0.032587  | 0.176746  |
|   | 8  | 0.4849167*  | 0.0358089 | 0.000 | 0.412837  | 0.556996  |
|   | 9  | 0.1476667*  | 0.0358089 | 0.000 | 0.075587  | 0.219746  |
|   | 10 | 0.3460333*  | 0.0358089 | 0.000 | 0.273954  | 0.418113  |
|   | 11 | 0.2185667*  | 0.0358089 | 0.000 | 0.146487  | 0.290646  |
|   | 12 | 0.2322000*  | 0.0358089 | 0.000 | 0.160120  | 0.304280  |
|   | 13 | 0.1980667*  | 0.0358089 | 0.000 | 0.125987  | 0.270146  |
|   | 14 | 0.2513167*  | 0.0358089 | 0.000 | 0.179237  | 0.323396  |
|   | 15 | 0.4508167*  | 0.0358089 | 0.000 | 0.378737  | 0.522896  |
|   | 16 | 0.3642667*  | 0.0358089 | 0.000 | 0.292187  | 0.436346  |
|   | 17 | 0.3415333*  | 0.0358089 | 0.000 | 0.269454  | 0.413613  |
|   | 18 | 0.2595333*  | 0.0358089 | 0.000 | 0.187454  | 0.331613  |
|   | 19 | 0.3743167*  | 0.0358089 | 0.000 | 0.302237  | 0.446396  |
|   | 20 | 0.3961333*  | 0.0358089 | 0.000 | 0.324054  | 0.468213  |
|   | 21 | 0.2731667*  | 0.0358089 | 0.000 | 0.201087  | 0.345246  |
|   | 22 | 0.4098000*  | 0.0358089 | 0.000 | 0.337720  | 0.481880  |
|   | 23 | −0.4918333* | 0.0358089 | 0.000 | −0.563913 | −0.419754 |
| 8 | 1  | −0.0432167  | 0.0358089 | 0.234 | −0.115296 | 0.028863  |



|   |    |             |           |       |           |           |
|---|----|-------------|-----------|-------|-----------|-----------|
|   | 2  | −0.2618500* | 0.0358089 | 0.000 | −0.333930 | −0.189770 |
|   | 3  | −0.0341500  | 0.0358089 | 0.345 | −0.106230 | 0.037930  |
|   | 4  | −0.2800167* | 0.0358089 | 0.000 | −0.352096 | −0.207937 |
|   | 5  | −0.0022500  | 0.0358089 | 0.950 | −0.074330 | 0.069830  |
|   | 6  | −0.3802500* | 0.0358089 | 0.000 | −0.452330 | −0.308170 |
|   | 7  | −0.4849167* | 0.0358089 | 0.000 | −0.556996 | −0.412837 |
|   | 9  | −0.3372500* | 0.0358089 | 0.000 | −0.409330 | −0.265170 |
|   | 10 | −0.1388833* | 0.0358089 | 0.000 | −0.210963 | −0.066804 |
|   | 11 | −0.2663500* | 0.0358089 | 0.000 | −0.338430 | −0.194270 |
|   | 12 | −0.2527167* | 0.0358089 | 0.000 | −0.324796 | −0.180637 |
|   | 13 | −0.2868500* | 0.0358089 | 0.000 | −0.358930 | −0.214770 |
|   | 14 | −0.2336000* | 0.0358089 | 0.000 | −0.305680 | −0.161520 |
|   | 15 | −0.0341000  | 0.0358089 | 0.346 | −0.106180 | 0.037980  |
|   | 16 | −0.1206500* | 0.0358089 | 0.002 | −0.192730 | −0.048570 |
|   | 17 | −0.1433833* | 0.0358089 | 0.000 | −0.215463 | −0.071304 |
|   | 18 | −0.2253833* | 0.0358089 | 0.000 | −0.297463 | −0.153304 |
|   | 19 | −0.1106000* | 0.0358089 | 0.003 | −0.182680 | −0.038520 |
|   | 20 | −0.0887833* | 0.0358089 | 0.017 | −0.160863 | −0.016704 |
|   | 21 | −0.2117500* | 0.0358089 | 0.000 | −0.283830 | −0.139670 |
|   | 22 | −0.0751167* | 0.0358089 | 0.041 | −0.147196 | −0.003037 |
|   | 23 | −0.9767500* | 0.0358089 | 0.000 | −1.048830 | −0.904670 |
| 9 | 1  | 0.2940333*  | 0.0358089 | 0.000 | 0.221954  | 0.366113  |
|   | 2  | 0.0754000*  | 0.0358089 | 0.041 | 0.003320  | 0.147480  |
|   | 3  | 0.3031000*  | 0.0358089 | 0.000 | 0.231020  | 0.375180  |
|   | 4  | 0.0572333   | 0.0358089 | 0.117 | −0.014846 | 0.129313  |
|   | 5  | 0.3350000*  | 0.0358089 | 0.000 | 0.262920  | 0.407080  |
|   | 6  | −0.0430000  | 0.0358089 | 0.236 | −0.115080 | 0.029080  |
|   | 7  | −0.1476667* | 0.0358089 | 0.000 | −0.219746 | −0.075587 |
|   | 8  | 0.3372500*  | 0.0358089 | 0.000 | 0.265170  | 0.409330  |
|   | 10 | 0.1983667*  | 0.0358089 | 0.000 | 0.126287  | 0.270446  |
|   | 11 | 0.0709000   | 0.0358089 | 0.054 | −0.001180 | 0.142980  |
|   | 12 | 0.0845333*  | 0.0358089 | 0.023 | 0.012454  | 0.156613  |
|   | 13 | 0.0504000   | 0.0358089 | 0.166 | −0.021680 | 0.122480  |
|   | 14 | 0.1036500*  | 0.0358089 | 0.006 | 0.031570  | 0.175730  |
|   | 15 | 0.3031500*  | 0.0358089 | 0.000 | 0.231070  | 0.375230  |
|   | 16 | 0.2166000*  | 0.0358089 | 0.000 | 0.144520  | 0.288680  |
|   | 17 | 0.1938667*  | 0.0358089 | 0.000 | 0.121787  | 0.265946  |
|   | 18 | 0.1118667*  | 0.0358089 | 0.003 | 0.039787  | 0.183946  |
|   | 19 | 0.2266500*  | 0.0358089 | 0.000 | 0.154570  | 0.298730  |
|   | 20 | 0.2484667*  | 0.0358089 | 0.000 | 0.176387  | 0.320546  |
|   | 21 | 0.1255000*  | 0.0358089 | 0.001 | 0.053420  | 0.197580  |

|    |    |             |           |       |           |           |
|----|----|-------------|-----------|-------|-----------|-----------|
| 10 | 22 | 0.2621333*  | 0.0358089 | 0.000 | 0.190054  | 0.334213  |
|    | 23 | −0.6395000* | 0.0358089 | 0.000 | −0.711580 | −0.567420 |
|    | 1  | 0.0956667*  | 0.0358089 | 0.010 | 0.023587  | 0.167746  |
|    | 2  | −0.1229667* | 0.0358089 | 0.001 | −0.195046 | −0.050887 |
|    | 3  | 0.1047333*  | 0.0358089 | 0.005 | 0.032654  | 0.176813  |
|    | 4  | −0.1411333* | 0.0358089 | 0.000 | −0.213213 | −0.069054 |
|    | 5  | 0.1366333*  | 0.0358089 | 0.000 | 0.064554  | 0.208713  |
|    | 6  | −0.2413667* | 0.0358089 | 0.000 | −0.313446 | −0.169287 |
|    | 7  | −0.3460333* | 0.0358089 | 0.000 | −0.418113 | −0.273954 |
|    | 8  | 0.1388833*  | 0.0358089 | 0.000 | 0.066804  | 0.210963  |
|    | 9  | −0.1983667* | 0.0358089 | 0.000 | −0.270446 | −0.126287 |
|    | 11 | −0.1274667* | 0.0358089 | 0.001 | −0.199546 | −0.055387 |
|    | 12 | −0.1138333* | 0.0358089 | 0.003 | −0.185913 | −0.041754 |
|    | 13 | −0.1479667* | 0.0358089 | 0.000 | −0.220046 | −0.075887 |
|    | 14 | −0.0947167* | 0.0358089 | 0.011 | −0.166796 | −0.022637 |
|    | 15 | 0.1047833*  | 0.0358089 | 0.005 | 0.032704  | 0.176863  |
|    | 16 | 0.0182333   | 0.0358089 | 0.613 | −0.053846 | 0.090313  |
|    | 17 | −0.0045000  | 0.0358089 | 0.901 | −0.076580 | 0.067580  |
|    | 18 | −0.0865000* | 0.0358089 | 0.020 | −0.158580 | −0.014420 |
|    | 19 | 0.0282833   | 0.0358089 | 0.434 | −0.043796 | 0.100363  |
|    | 20 | 0.0501000   | 0.0358089 | 0.168 | −0.021980 | 0.122180  |
|    | 21 | −0.0728667* | 0.0358089 | 0.048 | −0.144946 | −0.000787 |
|    | 22 | 0.0637667   | 0.0358089 | 0.082 | −0.008313 | 0.135846  |
|    | 23 | −0.8378667* | 0.0358089 | 0.000 | −0.909946 | −0.765787 |
| 11 | 1  | 0.2231333*  | 0.0358089 | 0.000 | 0.151054  | 0.295213  |
|    | 2  | 0.0045000   | 0.0358089 | 0.901 | −0.067580 | 0.076580  |
|    | 3  | 0.2322000*  | 0.0358089 | 0.000 | 0.160120  | 0.304280  |
|    | 4  | −0.0136667  | 0.0358089 | 0.704 | −0.085746 | 0.058413  |
|    | 5  | 0.2641000*  | 0.0358089 | 0.000 | 0.192020  | 0.336180  |
|    | 6  | −0.1139000* | 0.0358089 | 0.003 | −0.185980 | −0.041820 |
|    | 7  | −0.2185667* | 0.0358089 | 0.000 | −0.290646 | −0.146487 |
|    | 8  | 0.2663500*  | 0.0358089 | 0.000 | 0.194270  | 0.338430  |
|    | 9  | −0.0709000  | 0.0358089 | 0.054 | −0.142980 | 0.001180  |
|    | 10 | 0.1274667*  | 0.0358089 | 0.001 | 0.055387  | 0.199546  |
|    | 12 | 0.0136333   | 0.0358089 | 0.705 | −0.058446 | 0.085713  |
|    | 13 | −0.0205000  | 0.0358089 | 0.570 | −0.092580 | 0.051580  |
|    | 14 | 0.0327500   | 0.0358089 | 0.365 | −0.039330 | 0.104830  |
|    | 15 | 0.2322500*  | 0.0358089 | 0.000 | 0.160170  | 0.304330  |
|    | 16 | 0.1457000*  | 0.0358089 | 0.000 | 0.073620  | 0.217780  |
|    | 17 | 0.1229667*  | 0.0358089 | 0.001 | 0.050887  | 0.195046  |
|    | 18 | 0.0409667   | 0.0358089 | 0.259 | −0.031113 | 0.113046  |

|    |    |             |           |       |           |           |
|----|----|-------------|-----------|-------|-----------|-----------|
|    | 19 | 0.1557500*  | 0.0358089 | 0.000 | 0.083670  | 0.227830  |
|    | 20 | 0.1775667*  | 0.0358089 | 0.000 | 0.105487  | 0.249646  |
|    | 21 | 0.0546000   | 0.0358089 | 0.134 | −0.017480 | 0.126680  |
|    | 22 | 0.1912333*  | 0.0358089 | 0.000 | 0.119154  | 0.263313  |
|    | 23 | −0.7104000* | 0.0358089 | 0.000 | −0.782480 | −0.638320 |
| 12 | 1  | 0.2095000*  | 0.0358089 | 0.000 | 0.137420  | 0.281580  |
|    | 2  | −0.0091333  | 0.0358089 | 0.800 | −0.081213 | 0.062946  |
|    | 3  | 0.2185667*  | 0.0358089 | 0.000 | 0.146487  | 0.290646  |
|    | 4  | −0.0273000  | 0.0358089 | 0.450 | −0.099380 | 0.044780  |
|    | 5  | 0.2504667*  | 0.0358089 | 0.000 | 0.178387  | 0.322546  |
|    | 6  | −0.1275333* | 0.0358089 | 0.001 | −0.199613 | −0.055454 |
|    | 7  | −0.2322000* | 0.0358089 | 0.000 | −0.304280 | −0.160120 |
|    | 8  | 0.2527167*  | 0.0358089 | 0.000 | 0.180637  | 0.324796  |
|    | 9  | −0.0845333* | 0.0358089 | 0.023 | −0.156613 | −0.012454 |
|    | 10 | 0.1138333*  | 0.0358089 | 0.003 | 0.041754  | 0.185913  |
|    | 11 | −0.0136333  | 0.0358089 | 0.705 | −0.085713 | 0.058446  |
|    | 13 | −0.0341333  | 0.0358089 | 0.345 | −0.106213 | 0.037946  |
|    | 14 | 0.0191167   | 0.0358089 | 0.596 | −0.052963 | 0.091196  |
|    | 15 | 0.2186167*  | 0.0358089 | 0.000 | 0.146537  | 0.290696  |
|    | 16 | 0.1320667*  | 0.0358089 | 0.001 | 0.059987  | 0.204146  |
|    | 17 | 0.1093333*  | 0.0358089 | 0.004 | 0.037254  | 0.181413  |
|    | 18 | 0.0273333   | 0.0358089 | 0.449 | −0.044746 | 0.099413  |
|    | 19 | 0.1421167*  | 0.0358089 | 0.000 | 0.070037  | 0.214196  |
|    | 20 | 0.1639333*  | 0.0358089 | 0.000 | 0.091854  | 0.236013  |
|    | 21 | 0.0409667   | 0.0358089 | 0.259 | −0.031113 | 0.113046  |
|    | 22 | 0.1776000*  | 0.0358089 | 0.000 | 0.105520  | 0.249680  |
|    | 23 | −0.7240333* | 0.0358089 | 0.000 | −0.796113 | −0.651954 |
| 13 | 1  | 0.2436333*  | 0.0358089 | 0.000 | 0.171554  | 0.315713  |
|    | 2  | 0.0250000   | 0.0358089 | 0.489 | −0.047080 | 0.097080  |
|    | 3  | 0.2527000*  | 0.0358089 | 0.000 | 0.180620  | 0.324780  |
|    | 4  | 0.0068333   | 0.0358089 | 0.850 | −0.065246 | 0.078913  |
|    | 5  | 0.2846000*  | 0.0358089 | 0.000 | 0.212520  | 0.356680  |
|    | 6  | −0.0934000* | 0.0358089 | 0.012 | −0.165480 | −0.021320 |
|    | 7  | −0.1980667* | 0.0358089 | 0.000 | −0.270146 | −0.125987 |
|    | 8  | 0.2868500*  | 0.0358089 | 0.000 | 0.214770  | 0.358930  |
|    | 9  | −0.0504000  | 0.0358089 | 0.166 | −0.122480 | 0.021680  |
|    | 10 | 0.1479667*  | 0.0358089 | 0.000 | 0.075887  | 0.220046  |
|    | 11 | 0.0205000   | 0.0358089 | 0.570 | −0.051580 | 0.092580  |
|    | 12 | 0.0341333   | 0.0358089 | 0.345 | −0.037946 | 0.106213  |
|    | 14 | 0.0532500   | 0.0358089 | 0.144 | −0.018830 | 0.125330  |
|    | 15 | 0.2527500*  | 0.0358089 | 0.000 | 0.180670  | 0.324830  |

|    |    |             |           |       |           |           |
|----|----|-------------|-----------|-------|-----------|-----------|
|    | 16 | 0.1662000*  | 0.0358089 | 0.000 | 0.094120  | 0.238280  |
|    | 17 | 0.1434667*  | 0.0358089 | 0.000 | 0.071387  | 0.215546  |
|    | 18 | 0.0614667   | 0.0358089 | 0.093 | −0.010613 | 0.133546  |
|    | 19 | 0.1762500*  | 0.0358089 | 0.000 | 0.104170  | 0.248330  |
|    | 20 | 0.1980667*  | 0.0358089 | 0.000 | 0.125987  | 0.270146  |
|    | 21 | 0.0751000*  | 0.0358089 | 0.041 | 0.003020  | 0.147180  |
|    | 22 | 0.2117333*  | 0.0358089 | 0.000 | 0.139654  | 0.283813  |
|    | 23 | −0.6899000* | 0.0358089 | 0.000 | −0.761980 | −0.617820 |
| 14 | 1  | 0.1903833*  | 0.0358089 | 0.000 | 0.118304  | 0.262463  |
|    | 2  | −0.0282500  | 0.0358089 | 0.434 | −0.100330 | 0.043830  |
|    | 3  | 0.1994500*  | 0.0358089 | 0.000 | 0.127370  | 0.271530  |
|    | 4  | −0.0464167  | 0.0358089 | 0.201 | −0.118496 | 0.025663  |
|    | 5  | 0.2313500*  | 0.0358089 | 0.000 | 0.159270  | 0.303430  |
|    | 6  | −0.1466500* | 0.0358089 | 0.000 | −0.218730 | −0.074570 |
|    | 7  | −0.2513167* | 0.0358089 | 0.000 | −0.323396 | −0.179237 |
|    | 8  | 0.2336000*  | 0.0358089 | 0.000 | 0.161520  | 0.305680  |
|    | 9  | −0.1036500* | 0.0358089 | 0.006 | −0.175730 | −0.031570 |
|    | 10 | 0.0947167*  | 0.0358089 | 0.011 | 0.022637  | 0.166796  |
|    | 11 | −0.0327500  | 0.0358089 | 0.365 | −0.104830 | 0.039330  |
|    | 12 | −0.0191167  | 0.0358089 | 0.596 | −0.091196 | 0.052963  |
|    | 13 | −0.0532500  | 0.0358089 | 0.144 | −0.125330 | 0.018830  |
|    | 15 | 0.1995000*  | 0.0358089 | 0.000 | 0.127420  | 0.271580  |
|    | 16 | 0.1129500*  | 0.0358089 | 0.003 | 0.040870  | 0.185030  |
|    | 17 | 0.0902167*  | 0.0358089 | 0.015 | 0.018137  | 0.162296  |
|    | 18 | 0.0082167   | 0.0358089 | 0.820 | −0.063863 | 0.080296  |
|    | 19 | 0.1230000*  | 0.0358089 | 0.001 | 0.050920  | 0.195080  |
|    | 20 | 0.1448167*  | 0.0358089 | 0.000 | 0.072737  | 0.216896  |
|    | 21 | 0.0218500   | 0.0358089 | 0.545 | −0.050230 | 0.093930  |
|    | 22 | 0.1584833*  | 0.0358089 | 0.000 | 0.086404  | 0.230563  |
|    | 23 | −0.7431500* | 0.0358089 | 0.000 | −0.815230 | −0.671070 |
| 15 | 1  | −0.0091167  | 0.0358089 | 0.800 | −0.081196 | 0.062963  |
|    | 2  | −0.2277500* | 0.0358089 | 0.000 | −0.299830 | −0.155670 |
|    | 3  | −0.0000500  | 0.0358089 | 0.999 | −0.072130 | 0.072030  |
|    | 4  | −0.2459167* | 0.0358089 | 0.000 | −0.317996 | −0.173837 |
|    | 5  | 0.0318500   | 0.0358089 | 0.378 | −0.040230 | 0.103930  |
|    | 6  | −0.3461500* | 0.0358089 | 0.000 | −0.418230 | −0.274070 |
|    | 7  | −0.4508167* | 0.0358089 | 0.000 | −0.522896 | −0.378737 |
|    | 8  | 0.0341000   | 0.0358089 | 0.346 | −0.037980 | 0.106180  |
|    | 9  | −0.3031500* | 0.0358089 | 0.000 | −0.375230 | −0.231070 |
|    | 10 | −0.1047833* | 0.0358089 | 0.005 | −0.176863 | −0.032704 |
|    | 11 | −0.2322500* | 0.0358089 | 0.000 | −0.304330 | −0.160170 |

|    |    |             |           |       |           |           |
|----|----|-------------|-----------|-------|-----------|-----------|
|    | 12 | −0.2186167* | 0.0358089 | 0.000 | −0.290696 | −0.146537 |
|    | 13 | −0.2527500* | 0.0358089 | 0.000 | −0.324830 | −0.180670 |
|    | 14 | −0.1995000* | 0.0358089 | 0.000 | −0.271580 | −0.127420 |
|    | 16 | −0.0865500* | 0.0358089 | 0.020 | −0.158630 | −0.014470 |
|    | 17 | −0.1092833* | 0.0358089 | 0.004 | −0.181363 | −0.037204 |
|    | 18 | −0.1912833* | 0.0358089 | 0.000 | −0.263363 | −0.119204 |
|    | 19 | −0.0765000* | 0.0358089 | 0.038 | −0.148580 | −0.004420 |
|    | 20 | −0.0546833  | 0.0358089 | 0.134 | −0.126763 | 0.017396  |
|    | 21 | −0.1776500* | 0.0358089 | 0.000 | −0.249730 | −0.105570 |
|    | 22 | −0.0410167  | 0.0358089 | 0.258 | −0.113096 | 0.031063  |
|    | 23 | −0.9426500* | 0.0358089 | 0.000 | −1.014730 | −0.870570 |
| 16 | 1  | 0.0774333*  | 0.0358089 | 0.036 | 0.005354  | 0.149513  |
|    | 2  | −0.1412000* | 0.0358089 | 0.000 | −0.213280 | −0.069120 |
|    | 3  | 0.0865000*  | 0.0358089 | 0.020 | 0.014420  | 0.158580  |
|    | 4  | −0.1593667* | 0.0358089 | 0.000 | −0.231446 | −0.087287 |
|    | 5  | 0.1184000*  | 0.0358089 | 0.002 | 0.046320  | 0.190480  |
|    | 6  | −0.2596000* | 0.0358089 | 0.000 | −0.331680 | −0.187520 |
|    | 7  | −0.3642667* | 0.0358089 | 0.000 | −0.436346 | −0.292187 |
|    | 8  | 0.1206500*  | 0.0358089 | 0.002 | 0.048570  | 0.192730  |
|    | 9  | −0.2166000* | 0.0358089 | 0.000 | −0.288680 | −0.144520 |
|    | 10 | −0.0182333  | 0.0358089 | 0.613 | −0.090313 | 0.053846  |
|    | 11 | −0.1457000* | 0.0358089 | 0.000 | −0.217780 | −0.073620 |
|    | 12 | −0.1320667* | 0.0358089 | 0.001 | −0.204146 | −0.059987 |
|    | 13 | −0.1662000* | 0.0358089 | 0.000 | −0.238280 | −0.094120 |
|    | 14 | −0.1129500* | 0.0358089 | 0.003 | −0.185030 | −0.040870 |
|    | 15 | 0.0865500*  | 0.0358089 | 0.020 | 0.014470  | 0.158630  |
|    | 17 | −0.0227333  | 0.0358089 | 0.529 | −0.094813 | 0.049346  |
|    | 18 | −0.1047333* | 0.0358089 | 0.005 | −0.176813 | −0.032654 |
|    | 19 | 0.0100500   | 0.0358089 | 0.780 | −0.062030 | 0.082130  |
|    | 20 | 0.0318667   | 0.0358089 | 0.378 | −0.040213 | 0.103946  |
|    | 21 | −0.0911000* | 0.0358089 | 0.014 | −0.163180 | −0.019020 |
|    | 22 | 0.0455333   | 0.0358089 | 0.210 | −0.026546 | 0.117613  |
|    | 23 | −0.8561000* | 0.0358089 | 0.000 | −0.928180 | −0.784020 |
| 17 | 1  | 0.1001667*  | 0.0358089 | 0.008 | 0.028087  | 0.172246  |
|    | 2  | −0.1184667* | 0.0358089 | 0.002 | −0.190546 | −0.046387 |
|    | 3  | 0.1092333*  | 0.0358089 | 0.004 | 0.037154  | 0.181313  |
|    | 4  | −0.1366333* | 0.0358089 | 0.000 | −0.208713 | −0.064554 |
|    | 5  | 0.1411333*  | 0.0358089 | 0.000 | 0.069054  | 0.213213  |
|    | 6  | −0.2368667* | 0.0358089 | 0.000 | −0.308946 | −0.164787 |
|    | 7  | −0.3415333* | 0.0358089 | 0.000 | −0.413613 | −0.269454 |
|    | 8  | 0.1433833*  | 0.0358089 | 0.000 | 0.071304  | 0.215463  |

|    |    |             |           |       |           |           |
|----|----|-------------|-----------|-------|-----------|-----------|
|    | 9  | −0.1938667* | 0.0358089 | 0.000 | −0.265946 | −0.121787 |
|    | 10 | 0.0045000   | 0.0358089 | 0.901 | −0.067580 | 0.076580  |
|    | 11 | −0.1229667* | 0.0358089 | 0.001 | −0.195046 | −0.050887 |
|    | 12 | −0.1093333* | 0.0358089 | 0.004 | −0.181413 | −0.037254 |
|    | 13 | −0.1434667* | 0.0358089 | 0.000 | −0.215546 | −0.071387 |
|    | 14 | −0.0902167* | 0.0358089 | 0.015 | −0.162296 | −0.018137 |
|    | 15 | 0.1092833*  | 0.0358089 | 0.004 | 0.037204  | 0.181363  |
|    | 16 | 0.0227333   | 0.0358089 | 0.529 | −0.049346 | 0.094813  |
|    | 18 | −0.0820000* | 0.0358089 | 0.027 | −0.154080 | −0.009920 |
|    | 19 | 0.0327833   | 0.0358089 | 0.365 | −0.039296 | 0.104863  |
|    | 20 | 0.0546000   | 0.0358089 | 0.134 | −0.017480 | 0.126680  |
|    | 21 | −0.0683667  | 0.0358089 | 0.062 | −0.140446 | 0.003713  |
|    | 22 | 0.0682667   | 0.0358089 | 0.063 | −0.003813 | 0.140346  |
|    | 23 | −0.8333667* | 0.0358089 | 0.000 | −0.905446 | −0.761287 |
| 18 | 1  | 0.1821667*  | 0.0358089 | 0.000 | 0.110087  | 0.254246  |
|    | 2  | −0.0364667  | 0.0358089 | 0.314 | −0.108546 | 0.035613  |
|    | 3  | 0.1912333*  | 0.0358089 | 0.000 | 0.119154  | 0.263313  |
|    | 4  | −0.0546333  | 0.0358089 | 0.134 | −0.126713 | 0.017446  |
|    | 5  | 0.2231333*  | 0.0358089 | 0.000 | 0.151054  | 0.295213  |
|    | 6  | −0.1548667* | 0.0358089 | 0.000 | −0.226946 | −0.082787 |
|    | 7  | −0.2595333* | 0.0358089 | 0.000 | −0.331613 | −0.187454 |
|    | 8  | 0.2253833*  | 0.0358089 | 0.000 | 0.153304  | 0.297463  |
|    | 9  | −0.1118667* | 0.0358089 | 0.003 | −0.183946 | −0.039787 |
|    | 10 | 0.0865000*  | 0.0358089 | 0.020 | 0.014420  | 0.158580  |
|    | 11 | −0.0409667  | 0.0358089 | 0.259 | −0.113046 | 0.031113  |
|    | 12 | −0.0273333  | 0.0358089 | 0.449 | −0.099413 | 0.044746  |
|    | 13 | −0.0614667  | 0.0358089 | 0.093 | −0.133546 | 0.010613  |
|    | 14 | −0.0082167  | 0.0358089 | 0.820 | −0.080296 | 0.063863  |
|    | 15 | 0.1912833*  | 0.0358089 | 0.000 | 0.119204  | 0.263363  |
|    | 16 | 0.1047333*  | 0.0358089 | 0.005 | 0.032654  | 0.176813  |
|    | 17 | 0.0820000*  | 0.0358089 | 0.027 | 0.009920  | 0.154080  |
|    | 19 | 0.1147833*  | 0.0358089 | 0.002 | 0.042704  | 0.186863  |
|    | 20 | 0.1366000*  | 0.0358089 | 0.000 | 0.064520  | 0.208680  |
|    | 21 | 0.0136333   | 0.0358089 | 0.705 | −0.058446 | 0.085713  |
|    | 22 | 0.1502667*  | 0.0358089 | 0.000 | 0.078187  | 0.222346  |
|    | 23 | −0.7513667* | 0.0358089 | 0.000 | −0.823446 | −0.679287 |
| 19 | 1  | 0.0673833   | 0.0358089 | 0.066 | −0.004696 | 0.139463  |
|    | 2  | −0.1512500* | 0.0358089 | 0.000 | −0.223330 | −0.079170 |
|    | 3  | 0.0764500*  | 0.0358089 | 0.038 | 0.004370  | 0.148530  |
|    | 4  | −0.1694167* | 0.0358089 | 0.000 | −0.241496 | −0.097337 |
|    | 5  | 0.1083500*  | 0.0358089 | 0.004 | 0.036270  | 0.180430  |

|    |    |             |           |       |           |           |
|----|----|-------------|-----------|-------|-----------|-----------|
|    | 6  | −0.2696500* | 0.0358089 | 0.000 | −0.341730 | −0.197570 |
|    | 7  | −0.3743167* | 0.0358089 | 0.000 | −0.446396 | −0.302237 |
|    | 8  | 0.1106000*  | 0.0358089 | 0.003 | 0.038520  | 0.182680  |
|    | 9  | −0.2266500* | 0.0358089 | 0.000 | −0.298730 | −0.154570 |
|    | 10 | −0.0282833  | 0.0358089 | 0.434 | −0.100363 | 0.043796  |
|    | 11 | −0.1557500* | 0.0358089 | 0.000 | −0.227830 | −0.083670 |
|    | 12 | −0.1421167* | 0.0358089 | 0.000 | −0.214196 | −0.070037 |
|    | 13 | −0.1762500* | 0.0358089 | 0.000 | −0.248330 | −0.104170 |
|    | 14 | −0.1230000* | 0.0358089 | 0.001 | −0.195080 | −0.050920 |
|    | 15 | 0.0765000*  | 0.0358089 | 0.038 | 0.004420  | 0.148580  |
|    | 16 | −0.0100500  | 0.0358089 | 0.780 | −0.082130 | 0.062030  |
|    | 17 | −0.0327833  | 0.0358089 | 0.365 | −0.104863 | 0.039296  |
|    | 18 | −0.1147833* | 0.0358089 | 0.002 | −0.186863 | −0.042704 |
|    | 20 | 0.0218167   | 0.0358089 | 0.545 | −0.050263 | 0.093896  |
|    | 21 | −0.1011500* | 0.0358089 | 0.007 | −0.173230 | −0.029070 |
|    | 22 | 0.0354833   | 0.0358089 | 0.327 | −0.036596 | 0.107563  |
|    | 23 | −0.8661500* | 0.0358089 | 0.000 | −0.938230 | −0.794070 |
| 20 | 1  | 0.0455667   | 0.0358089 | 0.210 | −0.026513 | 0.117646  |
|    | 2  | −0.1730667* | 0.0358089 | 0.000 | −0.245146 | −0.100987 |
|    | 3  | 0.0546333   | 0.0358089 | 0.134 | −0.017446 | 0.126713  |
|    | 4  | −0.1912333* | 0.0358089 | 0.000 | −0.263313 | −0.119154 |
|    | 5  | 0.0865333*  | 0.0358089 | 0.020 | 0.014454  | 0.158613  |
|    | 6  | −0.2914667* | 0.0358089 | 0.000 | −0.363546 | −0.219387 |
|    | 7  | −0.3961333* | 0.0358089 | 0.000 | −0.468213 | −0.324054 |
|    | 8  | 0.0887833*  | 0.0358089 | 0.017 | 0.016704  | 0.160863  |
|    | 9  | −0.2484667* | 0.0358089 | 0.000 | −0.320546 | −0.176387 |
|    | 10 | −0.0501000  | 0.0358089 | 0.168 | −0.122180 | 0.021980  |
|    | 11 | −0.1775667* | 0.0358089 | 0.000 | −0.249646 | −0.105487 |
|    | 12 | −0.1639333* | 0.0358089 | 0.000 | −0.236013 | −0.091854 |
|    | 13 | −0.1980667* | 0.0358089 | 0.000 | −0.270146 | −0.125987 |
|    | 14 | −0.1448167* | 0.0358089 | 0.000 | −0.216896 | −0.072737 |
|    | 15 | 0.0546833   | 0.0358089 | 0.134 | −0.017396 | 0.126763  |
|    | 16 | −0.0318667  | 0.0358089 | 0.378 | −0.103946 | 0.040213  |
|    | 17 | −0.0546000  | 0.0358089 | 0.134 | −0.126680 | 0.017480  |
|    | 18 | −0.1366000* | 0.0358089 | 0.000 | −0.208680 | −0.064520 |
|    | 19 | −0.0218167  | 0.0358089 | 0.545 | −0.093896 | 0.050263  |
|    | 21 | −0.1229667* | 0.0358089 | 0.001 | −0.195046 | −0.050887 |
|    | 22 | 0.0136667   | 0.0358089 | 0.704 | −0.058413 | 0.085746  |
|    | 23 | −0.8879667* | 0.0358089 | 0.000 | −0.960046 | −0.815887 |
| 21 | 1  | 0.1685333*  | 0.0358089 | 0.000 | 0.096454  | 0.240613  |
|    | 2  | −0.0501000  | 0.0358089 | 0.168 | −0.122180 | 0.021980  |



|    |    |             |           |       |           |           |
|----|----|-------------|-----------|-------|-----------|-----------|
|    | 3  | 0.1776000*  | 0.0358089 | 0.000 | 0.105520  | 0.249680  |
|    | 4  | −0.0682667  | 0.0358089 | 0.063 | −0.140346 | 0.003813  |
|    | 5  | 0.2095000*  | 0.0358089 | 0.000 | 0.137420  | 0.281580  |
|    | 6  | −0.1685000* | 0.0358089 | 0.000 | −0.240580 | −0.096420 |
|    | 7  | −0.2731667* | 0.0358089 | 0.000 | −0.345246 | −0.201087 |
|    | 8  | 0.2117500*  | 0.0358089 | 0.000 | 0.139670  | 0.283830  |
|    | 9  | −0.1255000* | 0.0358089 | 0.001 | −0.197580 | −0.053420 |
|    | 10 | 0.0728667*  | 0.0358089 | 0.048 | 0.000787  | 0.144946  |
|    | 11 | −0.0546000  | 0.0358089 | 0.134 | −0.126680 | 0.017480  |
|    | 12 | −0.0409667  | 0.0358089 | 0.259 | −0.113046 | 0.031113  |
|    | 13 | −0.0751000* | 0.0358089 | 0.041 | −0.147180 | −0.003020 |
|    | 14 | −0.0218500  | 0.0358089 | 0.545 | −0.093930 | 0.050230  |
|    | 15 | 0.1776500*  | 0.0358089 | 0.000 | 0.105570  | 0.249730  |
|    | 16 | 0.0911000*  | 0.0358089 | 0.014 | 0.019020  | 0.163180  |
|    | 17 | 0.0683667   | 0.0358089 | 0.062 | −0.003713 | 0.140446  |
|    | 18 | −0.0136333  | 0.0358089 | 0.705 | −0.085713 | 0.058446  |
|    | 19 | 0.1011500*  | 0.0358089 | 0.007 | 0.029070  | 0.173230  |
|    | 20 | 0.1229667*  | 0.0358089 | 0.001 | 0.050887  | 0.195046  |
|    | 22 | 0.1366333*  | 0.0358089 | 0.000 | 0.064554  | 0.208713  |
|    | 23 | −0.7650000* | 0.0358089 | 0.000 | −0.837080 | −0.692920 |
| 22 | 1  | 0.0319000   | 0.0358089 | 0.378 | −0.040180 | 0.103980  |
|    | 2  | −0.1867333* | 0.0358089 | 0.000 | −0.258813 | −0.114654 |
|    | 3  | 0.0409667   | 0.0358089 | 0.259 | −0.031113 | 0.113046  |
|    | 4  | −0.2049000* | 0.0358089 | 0.000 | −0.276980 | −0.132820 |
|    | 5  | 0.0728667*  | 0.0358089 | 0.048 | 0.000787  | 0.144946  |
|    | 6  | −0.3051333* | 0.0358089 | 0.000 | −0.377213 | −0.233054 |
|    | 7  | −0.4098000* | 0.0358089 | 0.000 | −0.481880 | −0.337720 |
|    | 8  | 0.0751167*  | 0.0358089 | 0.041 | 0.003037  | 0.147196  |
|    | 9  | −0.2621333* | 0.0358089 | 0.000 | −0.334213 | −0.190054 |
|    | 10 | −0.0637667  | 0.0358089 | 0.082 | −0.135846 | 0.008313  |
|    | 11 | −0.1912333* | 0.0358089 | 0.000 | −0.263313 | −0.119154 |
|    | 12 | −0.1776000* | 0.0358089 | 0.000 | −0.249680 | −0.105520 |
|    | 13 | −0.2117333* | 0.0358089 | 0.000 | −0.283813 | −0.139654 |
|    | 14 | −0.1584833* | 0.0358089 | 0.000 | −0.230563 | −0.086404 |
|    | 15 | 0.0410167   | 0.0358089 | 0.258 | −0.031063 | 0.113096  |
|    | 16 | −0.0455333  | 0.0358089 | 0.210 | −0.117613 | 0.026546  |
|    | 17 | −0.0682667  | 0.0358089 | 0.063 | −0.140346 | 0.003813  |
|    | 18 | −0.1502667* | 0.0358089 | 0.000 | −0.222346 | −0.078187 |
|    | 19 | −0.0354833  | 0.0358089 | 0.327 | −0.107563 | 0.036596  |
|    | 20 | −0.0136667  | 0.0358089 | 0.704 | −0.085746 | 0.058413  |
|    | 21 | −0.1366333* | 0.0358089 | 0.000 | −0.208713 | −0.064554 |

|    |    |             |           |       |           |           |
|----|----|-------------|-----------|-------|-----------|-----------|
|    | 23 | −0.9016333* | 0.0358089 | 0.000 | −0.973713 | −0.829554 |
| 23 | 1  | 0.9335333*  | 0.0358089 | 0.000 | 0.861454  | 1.005613  |
|    | 2  | 0.7149000*  | 0.0358089 | 0.000 | 0.642820  | 0.786980  |
|    | 3  | 0.9426000*  | 0.0358089 | 0.000 | 0.870520  | 1.014680  |
|    | 4  | 0.6967333*  | 0.0358089 | 0.000 | 0.624654  | 0.768813  |
|    | 5  | 0.9745000*  | 0.0358089 | 0.000 | 0.902420  | 1.046580  |
|    | 6  | 0.5965000*  | 0.0358089 | 0.000 | 0.524420  | 0.668580  |
|    | 7  | 0.4918333*  | 0.0358089 | 0.000 | 0.419754  | 0.563913  |
|    | 8  | 0.9767500*  | 0.0358089 | 0.000 | 0.904670  | 1.048830  |
|    | 9  | 0.6395000*  | 0.0358089 | 0.000 | 0.567420  | 0.711580  |
|    | 10 | 0.8378667*  | 0.0358089 | 0.000 | 0.765787  | 0.909946  |
|    | 11 | 0.7104000*  | 0.0358089 | 0.000 | 0.638320  | 0.782480  |
|    | 12 | 0.7240333*  | 0.0358089 | 0.000 | 0.651954  | 0.796113  |
|    | 13 | 0.6899000*  | 0.0358089 | 0.000 | 0.617820  | 0.761980  |
|    | 14 | 0.7431500*  | 0.0358089 | 0.000 | 0.671070  | 0.815230  |
|    | 15 | 0.9426500*  | 0.0358089 | 0.000 | 0.870570  | 1.014730  |
|    | 16 | 0.8561000*  | 0.0358089 | 0.000 | 0.784020  | 0.928180  |
|    | 17 | 0.8333667*  | 0.0358089 | 0.000 | 0.761287  | 0.905446  |
|    | 18 | 0.7513667*  | 0.0358089 | 0.000 | 0.679287  | 0.823446  |
|    | 19 | 0.8661500*  | 0.0358089 | 0.000 | 0.794070  | 0.938230  |
|    | 20 | 0.8879667*  | 0.0358089 | 0.000 | 0.815887  | 0.960046  |
|    | 21 | 0.7650000*  | 0.0358089 | 0.000 | 0.692920  | 0.837080  |
|    | 22 | 0.9016333*  | 0.0358089 | 0.000 | 0.829554  | 0.973713  |

\*. The mean difference is significant at the 0.05 level.

**Table S4.** One-way ANOVA method was employed for statistical analysis of the inhibitions of 23 treatments on the pathogen *Villosicalva virens* LN-02. Nos. 1-22 were EtOAc extracts of endophytes and No. 23 was the positive control carbendazim.

| Descriptives |    |          |                |            |                                  |             |
|--------------|----|----------|----------------|------------|----------------------------------|-------------|
| Inhibition   |    |          |                |            |                                  |             |
|              | N  | Mean     | Std. Deviation | Std. Error | 95% Confidence Interval for Mean |             |
|              |    |          |                |            | Lower Bound                      | Upper Bound |
| 1            | 3  | 0.207200 | 0.1008188      | 0.0582078  | −0.043248                        | 0.457648    |
| 2            | 3  | 0.386900 | 0.0211000      | 0.0121821  | 0.334485                         | 0.439315    |
| 3            | 3  | 0.138500 | 0.0370000      | 0.0213620  | 0.046587                         | 0.230413    |
| 4            | 3  | 0.358700 | 0.0220257      | 0.0127165  | 0.303985                         | 0.413415    |
| 5            | 3  | 0.284800 | 0.0799672      | 0.0461691  | 0.086151                         | 0.483449    |
| 6            | 3  | 0.379867 | 0.0645598      | 0.0372736  | 0.219491                         | 0.540242    |
| 7            | 3  | 0.711033 | 0.0719446      | 0.0415372  | 0.532313                         | 0.889754    |
| 8            | 3  | 0.238933 | 0.0183020      | 0.0105667  | 0.193469                         | 0.284398    |
| 9            | 3  | 0.383400 | 0.0400165      | 0.0231035  | 0.283994                         | 0.482806    |
| 10           | 3  | 0.450133 | 0.0314503      | 0.0181579  | 0.372006                         | 0.528260    |
| 11           | 3  | 0.714933 | 0.0317053      | 0.0183050  | 0.636173                         | 0.793694    |
| 12           | 3  | 0.263567 | 0.0582320      | 0.0336202  | 0.118910                         | 0.408223    |
| 13           | 3  | 0.383400 | 0.0794079      | 0.0458462  | 0.186140                         | 0.580660    |
| 14           | 3  | 0.189633 | 0.0679774      | 0.0392468  | 0.020768                         | 0.358498    |
| 15           | 3  | 0.217800 | 0.0000000      | 0.0000000  | 0.217800                         | 0.217800    |
| 16           | 3  | 0.302300 | 0.0423000      | 0.0244219  | 0.197221                         | 0.407379    |
| 17           | 3  | 0.284733 | 0.0742526      | 0.0428698  | 0.100280                         | 0.469187    |
| 18           | 3  | 0.260033 | 0.0183020      | 0.0105667  | 0.214569                         | 0.305498    |
| 19           | 3  | 0.186050 | 0.0528500      | 0.0305130  | 0.054763                         | 0.317337    |
| 20           | 3  | 0.196633 | 0.0211500      | 0.0122110  | 0.144094                         | 0.249173    |
| 21           | 3  | 0.453833 | 0.0161918      | 0.0093483  | 0.413611                         | 0.494056    |
| 22           | 3  | 0.048600 | 0.0000000      | 0.0000000  | 0.048600                         | 0.048600    |
| 23           | 3  | 1.000000 | 0.0000000      | 0.0000000  | 1.000000                         | 1.000000    |
| Total        | 69 | 0.349608 | 0.2139985      | 0.0257624  | 0.298200                         | 0.401016    |

| Descriptives |         |         |
|--------------|---------|---------|
| Inhibition   |         |         |
|              | Minimum | Maximum |
| 1            | 0.1121  | 0.3129  |

|       |        |        |
|-------|--------|--------|
| 2     | 0.3658 | 0.4080 |
| 3     | 0.1015 | 0.1755 |
| 4     | 0.3340 | 0.3763 |
| 5     | 0.2283 | 0.3763 |
| 6     | 0.3235 | 0.4503 |
| 7     | 0.6300 | 0.7674 |
| 8     | 0.2178 | 0.2495 |
| 9     | 0.3552 | 0.4292 |
| 10    | 0.4186 | 0.4815 |
| 11    | 0.6829 | 0.7463 |
| 12    | 0.2072 | 0.3235 |
| 13    | 0.3023 | 0.4610 |
| 14    | 0.1121 | 0.2390 |
| 15    | 0.2178 | 0.2178 |
| 16    | 0.2600 | 0.3446 |
| 17    | 0.2072 | 0.3552 |
| 18    | 0.2389 | 0.2706 |
| 19    | 0.1332 | 0.2389 |
| 20    | 0.1755 | 0.2178 |
| 21    | 0.4397 | 0.4715 |
| 22    | 0.0486 | 0.0486 |
| 23    | 1.0000 | 1.0000 |
| Total | 0.0486 | 1.0000 |

### Test of Homogeneity of Variances

|            |                                      | Levene Statistic | df1 | df2    | Sig.  |
|------------|--------------------------------------|------------------|-----|--------|-------|
| Inhibition | Based on Mean                        | 2.200            | 22  | 46     | 0.012 |
|            | Based on Median                      | 0.934            | 22  | 46     | 0.556 |
|            | Based on Median and with adjusted df | 0.934            | 22  | 20.338 | 0.564 |
|            | Based on trimmed mean                | 2.105            | 22  | 46     | 0.017 |

### ANOVA

| Inhibition     |                |    |             |        |       |
|----------------|----------------|----|-------------|--------|-------|
|                | Sum of Squares | df | Mean Square | F      | Sig.  |
| Between Groups | 2.999          | 22 | 0.136       | 54.439 | 0.000 |
| Within Groups  | 0.115          | 46 | 0.003       |        |       |
| Total          | 3.114          | 68 |             |        |       |

## Post Hoc Tests

## Multiple Comparisons

Dependent Variable: Inhibition

LSD

| (I) Strains | (J) Strains | Mean Difference<br>(I-J) | Std. Error | Sig.  | 95% Confidence Interval |             |
|-------------|-------------|--------------------------|------------|-------|-------------------------|-------------|
|             |             |                          |            |       | Lower Bound             | Upper Bound |
| 1           | 2           | −0.1797000*              | 0.0408571  | 0.000 | −0.261941               | −0.097459   |
|             | 3           | 0.0687000                | 0.0408571  | 0.099 | −0.013541               | 0.150941    |
|             | 4           | −0.1515000*              | 0.0408571  | 0.001 | −0.233741               | −0.069259   |
|             | 5           | −0.0776000               | 0.0408571  | 0.064 | −0.159841               | 0.004641    |
|             | 6           | −0.1726667*              | 0.0408571  | 0.000 | −0.254908               | −0.090426   |
|             | 7           | −0.5038333*              | 0.0408571  | 0.000 | −0.586074               | −0.421592   |
|             | 8           | −0.0317333               | 0.0408571  | 0.441 | −0.113974               | 0.050508    |
|             | 9           | −0.1762000*              | 0.0408571  | 0.000 | −0.258441               | −0.093959   |
|             | 10          | −0.2429333*              | 0.0408571  | 0.000 | −0.325174               | −0.160692   |
|             | 11          | −0.5077333*              | 0.0408571  | 0.000 | −0.589974               | −0.425492   |
|             | 12          | −0.0563667               | 0.0408571  | 0.174 | −0.138608               | 0.025874    |
|             | 13          | −0.1762000*              | 0.0408571  | 0.000 | −0.258441               | −0.093959   |
|             | 14          | 0.0175667                | 0.0408571  | 0.669 | −0.064674               | 0.099808    |
|             | 15          | −0.0106000               | 0.0408571  | 0.796 | −0.092841               | 0.071641    |
|             | 16          | −0.0951000*              | 0.0408571  | 0.024 | −0.177341               | −0.012859   |
|             | 17          | −0.0775333               | 0.0408571  | 0.064 | −0.159774               | 0.004708    |
|             | 18          | −0.0528333               | 0.0408571  | 0.202 | −0.135074               | 0.029408    |
|             | 19          | 0.0211500                | 0.0408571  | 0.607 | −0.061091               | 0.103391    |
|             | 20          | 0.0105667                | 0.0408571  | 0.797 | −0.071674               | 0.092808    |
|             | 21          | −0.2466333*              | 0.0408571  | 0.000 | −0.328874               | −0.164392   |
|             | 22          | 0.1586000*               | 0.0408571  | 0.000 | 0.076359                | 0.240841    |
|             | 23          | −0.7928000*              | 0.0408571  | 0.000 | −0.875041               | −0.710559   |
| 2           | 1           | 0.1797000*               | 0.0408571  | 0.000 | 0.097459                | 0.261941    |
|             | 3           | 0.2484000*               | 0.0408571  | 0.000 | 0.166159                | 0.330641    |
|             | 4           | 0.0282000                | 0.0408571  | 0.494 | −0.054041               | 0.110441    |
|             | 5           | 0.1021000*               | 0.0408571  | 0.016 | 0.019859                | 0.184341    |
|             | 6           | 0.0070333                | 0.0408571  | 0.864 | −0.075208               | 0.089274    |
|             | 7           | −0.3241333*              | 0.0408571  | 0.000 | −0.406374               | −0.241892   |
|             | 8           | 0.1479667*               | 0.0408571  | 0.001 | 0.065726                | 0.230208    |
|             | 9           | 0.0035000                | 0.0408571  | 0.932 | −0.078741               | 0.085741    |
|             | 10          | −0.0632333               | 0.0408571  | 0.129 | −0.145474               | 0.019008    |

|   |    |             |           |       |           |           |
|---|----|-------------|-----------|-------|-----------|-----------|
|   | 11 | −0.3280333* | 0.0408571 | 0.000 | −0.410274 | −0.245792 |
|   | 12 | 0.1233333*  | 0.0408571 | 0.004 | 0.041092  | 0.205574  |
|   | 13 | 0.0035000   | 0.0408571 | 0.932 | −0.078741 | 0.085741  |
|   | 14 | 0.1972667*  | 0.0408571 | 0.000 | 0.115026  | 0.279508  |
|   | 15 | 0.1691000*  | 0.0408571 | 0.000 | 0.086859  | 0.251341  |
|   | 16 | 0.0846000*  | 0.0408571 | 0.044 | 0.002359  | 0.166841  |
|   | 17 | 0.1021667*  | 0.0408571 | 0.016 | 0.019926  | 0.184408  |
|   | 18 | 0.1268667*  | 0.0408571 | 0.003 | 0.044626  | 0.209108  |
|   | 19 | 0.2008500*  | 0.0408571 | 0.000 | 0.118609  | 0.283091  |
|   | 20 | 0.1902667*  | 0.0408571 | 0.000 | 0.108026  | 0.272508  |
|   | 21 | −0.0669333  | 0.0408571 | 0.108 | −0.149174 | 0.015308  |
|   | 22 | 0.3383000*  | 0.0408571 | 0.000 | 0.256059  | 0.420541  |
|   | 23 | −0.6131000* | 0.0408571 | 0.000 | −0.695341 | −0.530859 |
| 3 | 1  | −0.0687000  | 0.0408571 | 0.099 | −0.150941 | 0.013541  |
|   | 2  | −0.2484000* | 0.0408571 | 0.000 | −0.330641 | −0.166159 |
|   | 4  | −0.2202000* | 0.0408571 | 0.000 | −0.302441 | −0.137959 |
|   | 5  | −0.1463000* | 0.0408571 | 0.001 | −0.228541 | −0.064059 |
|   | 6  | −0.2413667* | 0.0408571 | 0.000 | −0.323608 | −0.159126 |
|   | 7  | −0.5725333* | 0.0408571 | 0.000 | −0.654774 | −0.490292 |
|   | 8  | −0.1004333* | 0.0408571 | 0.018 | −0.182674 | −0.018192 |
|   | 9  | −0.2449000* | 0.0408571 | 0.000 | −0.327141 | −0.162659 |
|   | 10 | −0.3116333* | 0.0408571 | 0.000 | −0.393874 | −0.229392 |
|   | 11 | −0.5764333* | 0.0408571 | 0.000 | −0.658674 | −0.494192 |
|   | 12 | −0.1250667* | 0.0408571 | 0.004 | −0.207308 | −0.042826 |
|   | 13 | −0.2449000* | 0.0408571 | 0.000 | −0.327141 | −0.162659 |
|   | 14 | −0.0511333  | 0.0408571 | 0.217 | −0.133374 | 0.031108  |
|   | 15 | −0.0793000  | 0.0408571 | 0.058 | −0.161541 | 0.002941  |
|   | 16 | −0.1638000* | 0.0408571 | 0.000 | −0.246041 | −0.081559 |
|   | 17 | −0.1462333* | 0.0408571 | 0.001 | −0.228474 | −0.063992 |
|   | 18 | −0.1215333* | 0.0408571 | 0.005 | −0.203774 | −0.039292 |
|   | 19 | −0.0475500  | 0.0408571 | 0.251 | −0.129791 | 0.034691  |
|   | 20 | −0.0581333  | 0.0408571 | 0.162 | −0.140374 | 0.024108  |
|   | 21 | −0.3153333* | 0.0408571 | 0.000 | −0.397574 | −0.233092 |
|   | 22 | 0.0899000*  | 0.0408571 | 0.033 | 0.007659  | 0.172141  |
|   | 23 | −0.8615000* | 0.0408571 | 0.000 | −0.943741 | −0.779259 |
| 4 | 1  | 0.1515000*  | 0.0408571 | 0.001 | 0.069259  | 0.233741  |
|   | 2  | −0.0282000  | 0.0408571 | 0.494 | −0.110441 | 0.054041  |
|   | 3  | 0.2202000*  | 0.0408571 | 0.000 | 0.137959  | 0.302441  |
|   | 5  | 0.0739000   | 0.0408571 | 0.077 | −0.008341 | 0.156141  |
|   | 6  | −0.0211667  | 0.0408571 | 0.607 | −0.103408 | 0.061074  |
|   | 7  | −0.3523333* | 0.0408571 | 0.000 | −0.434574 | −0.270092 |

|   |    |             |           |       |           |           |
|---|----|-------------|-----------|-------|-----------|-----------|
|   | 8  | 0.1197667*  | 0.0408571 | 0.005 | 0.037526  | 0.202008  |
|   | 9  | −0.0247000  | 0.0408571 | 0.548 | −0.106941 | 0.057541  |
|   | 10 | −0.0914333* | 0.0408571 | 0.030 | −0.173674 | −0.009192 |
|   | 11 | −0.3562333* | 0.0408571 | 0.000 | −0.438474 | −0.273992 |
|   | 12 | 0.0951333*  | 0.0408571 | 0.024 | 0.012892  | 0.177374  |
|   | 13 | −0.0247000  | 0.0408571 | 0.548 | −0.106941 | 0.057541  |
|   | 14 | 0.1690667*  | 0.0408571 | 0.000 | 0.086826  | 0.251308  |
|   | 15 | 0.1409000*  | 0.0408571 | 0.001 | 0.058659  | 0.223141  |
|   | 16 | 0.0564000   | 0.0408571 | 0.174 | −0.025841 | 0.138641  |
|   | 17 | 0.0739667   | 0.0408571 | 0.077 | −0.008274 | 0.156208  |
|   | 18 | 0.0986667*  | 0.0408571 | 0.020 | 0.016426  | 0.180908  |
|   | 19 | 0.1726500*  | 0.0408571 | 0.000 | 0.090409  | 0.254891  |
|   | 20 | 0.1620667*  | 0.0408571 | 0.000 | 0.079826  | 0.244308  |
|   | 21 | −0.0951333* | 0.0408571 | 0.024 | −0.177374 | −0.012892 |
|   | 22 | 0.3101000*  | 0.0408571 | 0.000 | 0.227859  | 0.392341  |
|   | 23 | −0.6413000* | 0.0408571 | 0.000 | −0.723541 | −0.559059 |
| 5 | 1  | 0.0776000   | 0.0408571 | 0.064 | −0.004641 | 0.159841  |
|   | 2  | −0.1021000* | 0.0408571 | 0.016 | −0.184341 | −0.019859 |
|   | 3  | 0.1463000*  | 0.0408571 | 0.001 | 0.064059  | 0.228541  |
|   | 4  | −0.0739000  | 0.0408571 | 0.077 | −0.156141 | 0.008341  |
|   | 6  | −0.0950667* | 0.0408571 | 0.024 | −0.177308 | −0.012826 |
|   | 7  | −0.4262333* | 0.0408571 | 0.000 | −0.508474 | −0.343992 |
|   | 8  | 0.0458667   | 0.0408571 | 0.267 | −0.036374 | 0.128108  |
|   | 9  | −0.0986000* | 0.0408571 | 0.020 | −0.180841 | −0.016359 |
|   | 10 | −0.1653333* | 0.0408571 | 0.000 | −0.247574 | −0.083092 |
|   | 11 | −0.4301333* | 0.0408571 | 0.000 | −0.512374 | −0.347892 |
|   | 12 | 0.0212333   | 0.0408571 | 0.606 | −0.061008 | 0.103474  |
|   | 13 | −0.0986000* | 0.0408571 | 0.020 | −0.180841 | −0.016359 |
|   | 14 | 0.0951667*  | 0.0408571 | 0.024 | 0.012926  | 0.177408  |
|   | 15 | 0.0670000   | 0.0408571 | 0.108 | −0.015241 | 0.149241  |
|   | 16 | −0.0175000  | 0.0408571 | 0.670 | −0.099741 | 0.064741  |
|   | 17 | 0.0000667   | 0.0408571 | 0.999 | −0.082174 | 0.082308  |
|   | 18 | 0.0247667   | 0.0408571 | 0.547 | −0.057474 | 0.107008  |
|   | 19 | 0.0987500*  | 0.0408571 | 0.020 | 0.016509  | 0.180991  |
|   | 20 | 0.0881667*  | 0.0408571 | 0.036 | 0.005926  | 0.170408  |
|   | 21 | −0.1690333* | 0.0408571 | 0.000 | −0.251274 | −0.086792 |
|   | 22 | 0.2362000*  | 0.0408571 | 0.000 | 0.153959  | 0.318441  |
|   | 23 | −0.7152000* | 0.0408571 | 0.000 | −0.797441 | −0.632959 |
| 6 | 1  | 0.1726667*  | 0.0408571 | 0.000 | 0.090426  | 0.254908  |
|   | 2  | −0.0070333  | 0.0408571 | 0.864 | −0.089274 | 0.075208  |
|   | 3  | 0.2413667*  | 0.0408571 | 0.000 | 0.159126  | 0.323608  |

|   |    |             |           |       |           |           |
|---|----|-------------|-----------|-------|-----------|-----------|
|   | 4  | 0.0211667   | 0.0408571 | 0.607 | −0.061074 | 0.103408  |
|   | 5  | 0.0950667*  | 0.0408571 | 0.024 | 0.012826  | 0.177308  |
|   | 7  | −0.3311667* | 0.0408571 | 0.000 | −0.413408 | −0.248926 |
|   | 8  | 0.1409333*  | 0.0408571 | 0.001 | 0.058692  | 0.223174  |
|   | 9  | −0.0035333  | 0.0408571 | 0.931 | −0.085774 | 0.078708  |
|   | 10 | −0.0702667  | 0.0408571 | 0.092 | −0.152508 | 0.011974  |
|   | 11 | −0.3350667* | 0.0408571 | 0.000 | −0.417308 | −0.252826 |
|   | 12 | 0.1163000*  | 0.0408571 | 0.007 | 0.034059  | 0.198541  |
|   | 13 | −0.0035333  | 0.0408571 | 0.931 | −0.085774 | 0.078708  |
|   | 14 | 0.1902333*  | 0.0408571 | 0.000 | 0.107992  | 0.272474  |
|   | 15 | 0.1620667*  | 0.0408571 | 0.000 | 0.079826  | 0.244308  |
|   | 16 | 0.0775667   | 0.0408571 | 0.064 | −0.004674 | 0.159808  |
|   | 17 | 0.0951333*  | 0.0408571 | 0.024 | 0.012892  | 0.177374  |
|   | 18 | 0.1198333*  | 0.0408571 | 0.005 | 0.037592  | 0.202074  |
|   | 19 | 0.1938167*  | 0.0408571 | 0.000 | 0.111576  | 0.276058  |
|   | 20 | 0.1832333*  | 0.0408571 | 0.000 | 0.100992  | 0.265474  |
|   | 21 | −0.0739667  | 0.0408571 | 0.077 | −0.156208 | 0.008274  |
|   | 22 | 0.3312667*  | 0.0408571 | 0.000 | 0.249026  | 0.413508  |
|   | 23 | −0.6201333* | 0.0408571 | 0.000 | −0.702374 | −0.537892 |
| 7 | 1  | 0.5038333*  | 0.0408571 | 0.000 | 0.421592  | 0.586074  |
|   | 2  | 0.3241333*  | 0.0408571 | 0.000 | 0.241892  | 0.406374  |
|   | 3  | 0.5725333*  | 0.0408571 | 0.000 | 0.490292  | 0.654774  |
|   | 4  | 0.3523333*  | 0.0408571 | 0.000 | 0.270092  | 0.434574  |
|   | 5  | 0.4262333*  | 0.0408571 | 0.000 | 0.343992  | 0.508474  |
|   | 6  | 0.3311667*  | 0.0408571 | 0.000 | 0.248926  | 0.413408  |
|   | 8  | 0.4721000*  | 0.0408571 | 0.000 | 0.389859  | 0.554341  |
|   | 9  | 0.3276333*  | 0.0408571 | 0.000 | 0.245392  | 0.409874  |
|   | 10 | 0.2609000*  | 0.0408571 | 0.000 | 0.178659  | 0.343141  |
|   | 11 | −0.0039000  | 0.0408571 | 0.924 | −0.086141 | 0.078341  |
|   | 12 | 0.4474667*  | 0.0408571 | 0.000 | 0.365226  | 0.529708  |
|   | 13 | 0.3276333*  | 0.0408571 | 0.000 | 0.245392  | 0.409874  |
|   | 14 | 0.5214000*  | 0.0408571 | 0.000 | 0.439159  | 0.603641  |
|   | 15 | 0.4932333*  | 0.0408571 | 0.000 | 0.410992  | 0.575474  |
|   | 16 | 0.4087333*  | 0.0408571 | 0.000 | 0.326492  | 0.490974  |
|   | 17 | 0.4263000*  | 0.0408571 | 0.000 | 0.344059  | 0.508541  |
|   | 18 | 0.4510000*  | 0.0408571 | 0.000 | 0.368759  | 0.533241  |
|   | 19 | 0.5249833*  | 0.0408571 | 0.000 | 0.442742  | 0.607224  |
|   | 20 | 0.5144000*  | 0.0408571 | 0.000 | 0.432159  | 0.596641  |
|   | 21 | 0.2572000*  | 0.0408571 | 0.000 | 0.174959  | 0.339441  |
|   | 22 | 0.6624333*  | 0.0408571 | 0.000 | 0.580192  | 0.744674  |
|   | 23 | −0.2889667* | 0.0408571 | 0.000 | −0.371208 | −0.206726 |



|   |    |             |           |       |           |           |
|---|----|-------------|-----------|-------|-----------|-----------|
| 8 | 1  | 0.0317333   | 0.0408571 | 0.441 | −0.050508 | 0.113974  |
|   | 2  | −0.1479667* | 0.0408571 | 0.001 | −0.230208 | −0.065726 |
|   | 3  | 0.1004333*  | 0.0408571 | 0.018 | 0.018192  | 0.182674  |
|   | 4  | −0.1197667* | 0.0408571 | 0.005 | −0.202008 | −0.037526 |
|   | 5  | −0.0458667  | 0.0408571 | 0.267 | −0.128108 | 0.036374  |
|   | 6  | −0.1409333* | 0.0408571 | 0.001 | −0.223174 | −0.058692 |
|   | 7  | −0.4721000* | 0.0408571 | 0.000 | −0.554341 | −0.389859 |
|   | 9  | −0.1444667* | 0.0408571 | 0.001 | −0.226708 | −0.062226 |
|   | 10 | −0.2112000* | 0.0408571 | 0.000 | −0.293441 | −0.128959 |
|   | 11 | −0.4760000* | 0.0408571 | 0.000 | −0.558241 | −0.393759 |
|   | 12 | −0.0246333  | 0.0408571 | 0.550 | −0.106874 | 0.057608  |
|   | 13 | −0.1444667* | 0.0408571 | 0.001 | −0.226708 | −0.062226 |
|   | 14 | 0.0493000   | 0.0408571 | 0.234 | −0.032941 | 0.131541  |
|   | 15 | 0.0211333   | 0.0408571 | 0.607 | −0.061108 | 0.103374  |
|   | 16 | −0.0633667  | 0.0408571 | 0.128 | −0.145608 | 0.018874  |
|   | 17 | −0.0458000  | 0.0408571 | 0.268 | −0.128041 | 0.036441  |
|   | 18 | −0.0211000  | 0.0408571 | 0.608 | −0.103341 | 0.061141  |
|   | 19 | 0.0528833   | 0.0408571 | 0.202 | −0.029358 | 0.135124  |
|   | 20 | 0.0423000   | 0.0408571 | 0.306 | −0.039941 | 0.124541  |
|   | 21 | −0.2149000* | 0.0408571 | 0.000 | −0.297141 | −0.132659 |
|   | 22 | 0.1903333*  | 0.0408571 | 0.000 | 0.108092  | 0.272574  |
|   | 23 | −0.7610667* | 0.0408571 | 0.000 | −0.843308 | −0.678826 |
| 9 | 1  | 0.1762000*  | 0.0408571 | 0.000 | 0.093959  | 0.258441  |
|   | 2  | −0.0035000  | 0.0408571 | 0.932 | −0.085741 | 0.078741  |
|   | 3  | 0.2449000*  | 0.0408571 | 0.000 | 0.162659  | 0.327141  |
|   | 4  | 0.0247000   | 0.0408571 | 0.548 | −0.057541 | 0.106941  |
|   | 5  | 0.0986000*  | 0.0408571 | 0.020 | 0.016359  | 0.180841  |
|   | 6  | 0.0035333   | 0.0408571 | 0.931 | −0.078708 | 0.085774  |
|   | 7  | −0.3276333* | 0.0408571 | 0.000 | −0.409874 | −0.245392 |
|   | 8  | 0.1444667*  | 0.0408571 | 0.001 | 0.062226  | 0.226708  |
|   | 10 | −0.0667333  | 0.0408571 | 0.109 | −0.148974 | 0.015508  |
|   | 11 | −0.3315333* | 0.0408571 | 0.000 | −0.413774 | −0.249292 |
|   | 12 | 0.1198333*  | 0.0408571 | 0.005 | 0.037592  | 0.202074  |
|   | 13 | 0.0000000   | 0.0408571 | 1.000 | −0.082241 | 0.082241  |
|   | 14 | 0.1937667*  | 0.0408571 | 0.000 | 0.111526  | 0.276008  |
|   | 15 | 0.1656000*  | 0.0408571 | 0.000 | 0.083359  | 0.247841  |
|   | 16 | 0.0811000   | 0.0408571 | 0.053 | −0.001141 | 0.163341  |
|   | 17 | 0.0986667*  | 0.0408571 | 0.020 | 0.016426  | 0.180908  |
|   | 18 | 0.1233667*  | 0.0408571 | 0.004 | 0.041126  | 0.205608  |
|   | 19 | 0.1973500*  | 0.0408571 | 0.000 | 0.115109  | 0.279591  |
|   | 20 | 0.1867667*  | 0.0408571 | 0.000 | 0.104526  | 0.269008  |

|    |    |             |           |       |           |           |
|----|----|-------------|-----------|-------|-----------|-----------|
|    | 21 | −0.0704333  | 0.0408571 | 0.091 | −0.152674 | 0.011808  |
|    | 22 | 0.3348000*  | 0.0408571 | 0.000 | 0.252559  | 0.417041  |
|    | 23 | −0.6166000* | 0.0408571 | 0.000 | −0.698841 | −0.534359 |
| 10 | 1  | 0.2429333*  | 0.0408571 | 0.000 | 0.160692  | 0.325174  |
|    | 2  | 0.0632333   | 0.0408571 | 0.129 | −0.019008 | 0.145474  |
|    | 3  | 0.3116333*  | 0.0408571 | 0.000 | 0.229392  | 0.393874  |
|    | 4  | 0.0914333*  | 0.0408571 | 0.030 | 0.009192  | 0.173674  |
|    | 5  | 0.1653333*  | 0.0408571 | 0.000 | 0.083092  | 0.247574  |
|    | 6  | 0.0702667   | 0.0408571 | 0.092 | −0.011974 | 0.152508  |
|    | 7  | −0.2609000* | 0.0408571 | 0.000 | −0.343141 | −0.178659 |
|    | 8  | 0.2112000*  | 0.0408571 | 0.000 | 0.128959  | 0.293441  |
|    | 9  | 0.0667333   | 0.0408571 | 0.109 | −0.015508 | 0.148974  |
|    | 11 | −0.2648000* | 0.0408571 | 0.000 | −0.347041 | −0.182559 |
|    | 12 | 0.1865667*  | 0.0408571 | 0.000 | 0.104326  | 0.268808  |
|    | 13 | 0.0667333   | 0.0408571 | 0.109 | −0.015508 | 0.148974  |
|    | 14 | 0.2605000*  | 0.0408571 | 0.000 | 0.178259  | 0.342741  |
|    | 15 | 0.2323333*  | 0.0408571 | 0.000 | 0.150092  | 0.314574  |
|    | 16 | 0.1478333*  | 0.0408571 | 0.001 | 0.065592  | 0.230074  |
|    | 17 | 0.1654000*  | 0.0408571 | 0.000 | 0.083159  | 0.247641  |
|    | 18 | 0.1901000*  | 0.0408571 | 0.000 | 0.107859  | 0.272341  |
|    | 19 | 0.2640833*  | 0.0408571 | 0.000 | 0.181842  | 0.346324  |
|    | 20 | 0.2535000*  | 0.0408571 | 0.000 | 0.171259  | 0.335741  |
|    | 21 | −0.0037000  | 0.0408571 | 0.928 | −0.085941 | 0.078541  |
|    | 22 | 0.4015333*  | 0.0408571 | 0.000 | 0.319292  | 0.483774  |
|    | 23 | −0.5498667* | 0.0408571 | 0.000 | −0.632108 | −0.467626 |
| 11 | 1  | 0.5077333*  | 0.0408571 | 0.000 | 0.425492  | 0.589974  |
|    | 2  | 0.3280333*  | 0.0408571 | 0.000 | 0.245792  | 0.410274  |
|    | 3  | 0.5764333*  | 0.0408571 | 0.000 | 0.494192  | 0.658674  |
|    | 4  | 0.3562333*  | 0.0408571 | 0.000 | 0.273992  | 0.438474  |
|    | 5  | 0.4301333*  | 0.0408571 | 0.000 | 0.347892  | 0.512374  |
|    | 6  | 0.3350667*  | 0.0408571 | 0.000 | 0.252826  | 0.417308  |
|    | 7  | 0.0039000   | 0.0408571 | 0.924 | −0.078341 | 0.086141  |
|    | 8  | 0.4760000*  | 0.0408571 | 0.000 | 0.393759  | 0.558241  |
|    | 9  | 0.3315333*  | 0.0408571 | 0.000 | 0.249292  | 0.413774  |
|    | 10 | 0.2648000*  | 0.0408571 | 0.000 | 0.182559  | 0.347041  |
|    | 12 | 0.4513667*  | 0.0408571 | 0.000 | 0.369126  | 0.533608  |
|    | 13 | 0.3315333*  | 0.0408571 | 0.000 | 0.249292  | 0.413774  |
|    | 14 | 0.5253000*  | 0.0408571 | 0.000 | 0.443059  | 0.607541  |
|    | 15 | 0.4971333*  | 0.0408571 | 0.000 | 0.414892  | 0.579374  |
|    | 16 | 0.4126333*  | 0.0408571 | 0.000 | 0.330392  | 0.494874  |
|    | 17 | 0.4302000*  | 0.0408571 | 0.000 | 0.347959  | 0.512441  |

|    |    |             |           |        |           |           |
|----|----|-------------|-----------|--------|-----------|-----------|
|    | 18 | 0.4549000*  | 0.0408571 | 0.000  | 0.372659  | 0.537141  |
|    | 19 | 0.5288833*  | 0.0408571 | 0.000  | 0.446642  | 0.611124  |
|    | 20 | 0.5183000*  | 0.0408571 | 0.000  | 0.436059  | 0.600541  |
|    | 21 | 0.2611000*  | 0.0408571 | 0.000  | 0.178859  | 0.343341  |
|    | 22 | 0.6663333*  | 0.0408571 | 0.000  | 0.584092  | 0.748574  |
|    | 23 | −0.2850667* | 0.0408571 | 0.000  | −0.367308 | −0.202826 |
| 12 | 1  | 0.0563667   | 0.0408571 | 0.174  | −0.025874 | 0.138608  |
|    | 2  | −0.1233333* | 0.0408571 | 0.004  | −0.205574 | −0.041092 |
|    | 3  | 0.1250667*  | 0.0408571 | 0.004  | 0.042826  | 0.207308  |
|    | 4  | −0.0951333* | 0.0408571 | 0.024  | −0.177374 | −0.012892 |
|    | 5  | −0.0212333  | 0.0408571 | 0.606  | −0.103474 | 0.061008  |
|    | 6  | −0.1163000* | 0.0408571 | 0.007  | −0.198541 | −0.034059 |
|    | 7  | −0.4474667* | 0.0408571 | 0.000  | −0.529708 | −0.365226 |
|    | 8  | 0.0246333   | 0.0408571 | 0.550  | −0.057608 | 0.106874  |
|    | 9  | −0.1198333* | 0.0408571 | 0.005  | −0.202074 | −0.037592 |
|    | 10 | −0.1865667* | 0.0408571 | 0.000  | −0.268808 | −0.104326 |
|    | 11 | −0.4513667* | 0.0408571 | 0.000  | −0.533608 | −0.369126 |
|    | 13 | −0.1198333* | 0.0408571 | 0.005  | −0.202074 | −0.037592 |
|    | 14 | 0.0739333   | 0.0408571 | 0.077  | −0.008308 | 0.156174  |
|    | 15 | 0.0457667   | 0.0408571 | 0.268  | −0.036474 | 0.128008  |
|    | 16 | −0.0387333  | 0.0408571 | 0.348  | −0.120974 | 0.043508  |
|    | 17 | −0.0211667  | 0.0408571 | 0.607  | −0.103408 | 0.061074  |
|    | 18 | 0.0035333   | 0.0408571 | 0.931  | −0.078708 | 0.085774  |
|    | 19 | 0.0775167   | 0.0408571 | 0.064  | −0.004724 | 0.159758  |
|    | 20 | 0.0669333   | 0.0408571 | 0.108  | −0.015308 | 0.149174  |
|    | 21 | −0.1902667* | 0.0408571 | 0.000  | −0.272508 | −0.108026 |
|    | 22 | 0.2149667*  | 0.0408571 | 0.000  | 0.132726  | 0.297208  |
|    | 23 | −0.7364333* | 0.0408571 | 0.000  | −0.818674 | −0.654192 |
| 13 | 1  | 0.1762000*  | 0.0408571 | 0.000  | 0.093959  | 0.258441  |
|    | 2  | −0.0035000  | 0.0408571 | 0.932  | −0.085741 | 0.078741  |
|    | 3  | 0.2449000*  | 0.0408571 | 0.000  | 0.162659  | 0.327141  |
|    | 4  | 0.0247000   | 0.0408571 | 0.548  | −0.057541 | 0.106941  |
|    | 5  | 0.0986000*  | 0.0408571 | 0.020  | 0.016359  | 0.180841  |
|    | 6  | 0.0035333   | 0.0408571 | 0.931  | −0.078708 | 0.085774  |
|    | 7  | −0.3276333* | 0.0408571 | 0.000  | −0.409874 | −0.245392 |
|    | 8  | 0.1444667*  | 0.0408571 | 0.001  | 0.062226  | 0.226708  |
|    | 9  | 0.0000000   | 0.0408571 | 10.000 | −0.082241 | 0.082241  |
|    | 10 | −0.0667333  | 0.0408571 | 0.109  | −0.148974 | 0.015508  |
|    | 11 | −0.3315333* | 0.0408571 | 0.000  | −0.413774 | −0.249292 |
|    | 12 | 0.1198333*  | 0.0408571 | 0.005  | 0.037592  | 0.202074  |
|    | 14 | 0.1937667*  | 0.0408571 | 0.000  | 0.111526  | 0.276008  |

|    |    |             |           |       |           |           |
|----|----|-------------|-----------|-------|-----------|-----------|
|    | 15 | 0.1656000*  | 0.0408571 | 0.000 | 0.083359  | 0.247841  |
|    | 16 | 0.0811000   | 0.0408571 | 0.053 | −0.001141 | 0.163341  |
|    | 17 | 0.0986667*  | 0.0408571 | 0.020 | 0.016426  | 0.180908  |
|    | 18 | 0.1233667*  | 0.0408571 | 0.004 | 0.041126  | 0.205608  |
|    | 19 | 0.1973500*  | 0.0408571 | 0.000 | 0.115109  | 0.279591  |
|    | 20 | 0.1867667*  | 0.0408571 | 0.000 | 0.104526  | 0.269008  |
|    | 21 | −0.0704333  | 0.0408571 | 0.091 | −0.152674 | 0.011808  |
|    | 22 | 0.3348000*  | 0.0408571 | 0.000 | 0.252559  | 0.417041  |
|    | 23 | −0.6166000* | 0.0408571 | 0.000 | −0.698841 | −0.534359 |
| 14 | 1  | −0.0175667  | 0.0408571 | 0.669 | −0.099808 | 0.064674  |
|    | 2  | −0.1972667* | 0.0408571 | 0.000 | −0.279508 | −0.115026 |
|    | 3  | 0.0511333   | 0.0408571 | 0.217 | −0.031108 | 0.133374  |
|    | 4  | −0.1690667* | 0.0408571 | 0.000 | −0.251308 | −0.086826 |
|    | 5  | −0.0951667* | 0.0408571 | 0.024 | −0.177408 | −0.012926 |
|    | 6  | −0.1902333* | 0.0408571 | 0.000 | −0.272474 | −0.107992 |
|    | 7  | −0.5214000* | 0.0408571 | 0.000 | −0.603641 | −0.439159 |
|    | 8  | −0.0493000  | 0.0408571 | 0.234 | −0.131541 | 0.032941  |
|    | 9  | −0.1937667* | 0.0408571 | 0.000 | −0.276008 | −0.111526 |
|    | 10 | −0.2605000* | 0.0408571 | 0.000 | −0.342741 | −0.178259 |
|    | 11 | −0.5253000* | 0.0408571 | 0.000 | −0.607541 | −0.443059 |
|    | 12 | −0.0739333  | 0.0408571 | 0.077 | −0.156174 | 0.008308  |
|    | 13 | −0.1937667* | 0.0408571 | 0.000 | −0.276008 | −0.111526 |
|    | 15 | −0.0281667  | 0.0408571 | 0.494 | −0.110408 | 0.054074  |
|    | 16 | −0.1126667* | 0.0408571 | 0.008 | −0.194908 | −0.030426 |
|    | 17 | −0.0951000* | 0.0408571 | 0.024 | −0.177341 | −0.012859 |
|    | 18 | −0.0704000  | 0.0408571 | 0.092 | −0.152641 | 0.011841  |
|    | 19 | 0.0035833   | 0.0408571 | 0.930 | −0.078658 | 0.085824  |
|    | 20 | −0.0070000  | 0.0408571 | 0.865 | −0.089241 | 0.075241  |
|    | 21 | −0.2642000* | 0.0408571 | 0.000 | −0.346441 | −0.181959 |
|    | 22 | 0.1410333*  | 0.0408571 | 0.001 | 0.058792  | 0.223274  |
|    | 23 | −0.8103667* | 0.0408571 | 0.000 | −0.892608 | −0.728126 |
| 15 | 1  | 0.0106000   | 0.0408571 | 0.796 | −0.071641 | 0.092841  |
|    | 2  | −0.1691000* | 0.0408571 | 0.000 | −0.251341 | −0.086859 |
|    | 3  | 0.0793000   | 0.0408571 | 0.058 | −0.002941 | 0.161541  |
|    | 4  | −0.1409000* | 0.0408571 | 0.001 | −0.223141 | −0.058659 |
|    | 5  | −0.0670000  | 0.0408571 | 0.108 | −0.149241 | 0.015241  |
|    | 6  | −0.1620667* | 0.0408571 | 0.000 | −0.244308 | −0.079826 |
|    | 7  | −0.4932333* | 0.0408571 | 0.000 | −0.575474 | −0.410992 |
|    | 8  | −0.0211333  | 0.0408571 | 0.607 | −0.103374 | 0.061108  |
|    | 9  | −0.1656000* | 0.0408571 | 0.000 | −0.247841 | −0.083359 |
|    | 10 | −0.2323333* | 0.0408571 | 0.000 | −0.314574 | −0.150092 |

|    |    |             |           |       |           |           |
|----|----|-------------|-----------|-------|-----------|-----------|
|    | 11 | −0.4971333* | 0.0408571 | 0.000 | −0.579374 | −0.414892 |
|    | 12 | −0.0457667  | 0.0408571 | 0.268 | −0.128008 | 0.036474  |
|    | 13 | −0.1656000* | 0.0408571 | 0.000 | −0.247841 | −0.083359 |
|    | 14 | 0.0281667   | 0.0408571 | 0.494 | −0.054074 | 0.110408  |
|    | 16 | −0.0845000* | 0.0408571 | 0.044 | −0.166741 | −0.002259 |
|    | 17 | −0.0669333  | 0.0408571 | 0.108 | −0.149174 | 0.015308  |
|    | 18 | −0.0422333  | 0.0408571 | 0.307 | −0.124474 | 0.040008  |
|    | 19 | 0.0317500   | 0.0408571 | 0.441 | −0.050491 | 0.113991  |
|    | 20 | 0.0211667   | 0.0408571 | 0.607 | −0.061074 | 0.103408  |
|    | 21 | −0.2360333* | 0.0408571 | 0.000 | −0.318274 | −0.153792 |
|    | 22 | 0.1692000*  | 0.0408571 | 0.000 | 0.086959  | 0.251441  |
|    | 23 | −0.7822000* | 0.0408571 | 0.000 | −0.864441 | −0.699959 |
| 16 | 1  | 0.0951000*  | 0.0408571 | 0.024 | 0.012859  | 0.177341  |
|    | 2  | −0.0846000* | 0.0408571 | 0.044 | −0.166841 | −0.002359 |
|    | 3  | 0.1638000*  | 0.0408571 | 0.000 | 0.081559  | 0.246041  |
|    | 4  | −0.0564000  | 0.0408571 | 0.174 | −0.138641 | 0.025841  |
|    | 5  | 0.0175000   | 0.0408571 | 0.670 | −0.064741 | 0.099741  |
|    | 6  | −0.0775667  | 0.0408571 | 0.064 | −0.159808 | 0.004674  |
|    | 7  | −0.4087333* | 0.0408571 | 0.000 | −0.490974 | −0.326492 |
|    | 8  | 0.0633667   | 0.0408571 | 0.128 | −0.018874 | 0.145608  |
|    | 9  | −0.0811000  | 0.0408571 | 0.053 | −0.163341 | 0.001141  |
|    | 10 | −0.1478333* | 0.0408571 | 0.001 | −0.230074 | −0.065592 |
|    | 11 | −0.4126333* | 0.0408571 | 0.000 | −0.494874 | −0.330392 |
|    | 12 | 0.0387333   | 0.0408571 | 0.348 | −0.043508 | 0.120974  |
|    | 13 | −0.0811000  | 0.0408571 | 0.053 | −0.163341 | 0.001141  |
|    | 14 | 0.1126667*  | 0.0408571 | 0.008 | 0.030426  | 0.194908  |
|    | 15 | 0.0845000*  | 0.0408571 | 0.044 | 0.002259  | 0.166741  |
|    | 17 | 0.0175667   | 0.0408571 | 0.669 | −0.064674 | 0.099808  |
|    | 18 | 0.0422667   | 0.0408571 | 0.306 | −0.039974 | 0.124508  |
|    | 19 | 0.1162500*  | 0.0408571 | 0.007 | 0.034009  | 0.198491  |
|    | 20 | 0.1056667*  | 0.0408571 | 0.013 | 0.023426  | 0.187908  |
|    | 21 | −0.1515333* | 0.0408571 | 0.001 | −0.233774 | −0.069292 |
|    | 22 | 0.2537000*  | 0.0408571 | 0.000 | 0.171459  | 0.335941  |
|    | 23 | −0.6977000* | 0.0408571 | 0.000 | −0.779941 | −0.615459 |
| 17 | 1  | 0.0775333   | 0.0408571 | 0.064 | −0.004708 | 0.159774  |
|    | 2  | −0.1021667* | 0.0408571 | 0.016 | −0.184408 | −0.019926 |
|    | 3  | 0.1462333*  | 0.0408571 | 0.001 | 0.063992  | 0.228474  |
|    | 4  | −0.0739667  | 0.0408571 | 0.077 | −0.156208 | 0.008274  |
|    | 5  | −0.0000667  | 0.0408571 | 0.999 | −0.082308 | 0.082174  |
|    | 6  | −0.0951333* | 0.0408571 | 0.024 | −0.177374 | −0.012892 |
|    | 7  | −0.4263000* | 0.0408571 | 0.000 | −0.508541 | −0.344059 |

|    |    |             |           |       |           |           |
|----|----|-------------|-----------|-------|-----------|-----------|
|    | 8  | 0.0458000   | 0.0408571 | 0.268 | −0.036441 | 0.128041  |
|    | 9  | −0.0986667* | 0.0408571 | 0.020 | −0.180908 | −0.016426 |
|    | 10 | −0.1654000* | 0.0408571 | 0.000 | −0.247641 | −0.083159 |
|    | 11 | −0.4302000* | 0.0408571 | 0.000 | −0.512441 | −0.347959 |
|    | 12 | 0.0211667   | 0.0408571 | 0.607 | −0.061074 | 0.103408  |
|    | 13 | −0.0986667* | 0.0408571 | 0.020 | −0.180908 | −0.016426 |
|    | 14 | 0.0951000*  | 0.0408571 | 0.024 | 0.012859  | 0.177341  |
|    | 15 | 0.0669333   | 0.0408571 | 0.108 | −0.015308 | 0.149174  |
|    | 16 | −0.0175667  | 0.0408571 | 0.669 | −0.099808 | 0.064674  |
|    | 18 | 0.0247000   | 0.0408571 | 0.548 | −0.057541 | 0.106941  |
|    | 19 | 0.0986833*  | 0.0408571 | 0.020 | 0.016442  | 0.180924  |
|    | 20 | 0.0881000*  | 0.0408571 | 0.036 | 0.005859  | 0.170341  |
|    | 21 | −0.1691000* | 0.0408571 | 0.000 | −0.251341 | −0.086859 |
|    | 22 | 0.2361333*  | 0.0408571 | 0.000 | 0.153892  | 0.318374  |
|    | 23 | −0.7152667* | 0.0408571 | 0.000 | −0.797508 | −0.633026 |
| 18 | 1  | 0.0528333   | 0.0408571 | 0.202 | −0.029408 | 0.135074  |
|    | 2  | −0.1268667* | 0.0408571 | 0.003 | −0.209108 | −0.044626 |
|    | 3  | 0.1215333*  | 0.0408571 | 0.005 | 0.039292  | 0.203774  |
|    | 4  | −0.0986667* | 0.0408571 | 0.020 | −0.180908 | −0.016426 |
|    | 5  | −0.0247667  | 0.0408571 | 0.547 | −0.107008 | 0.057474  |
|    | 6  | −0.1198333* | 0.0408571 | 0.005 | −0.202074 | −0.037592 |
|    | 7  | −0.4510000* | 0.0408571 | 0.000 | −0.533241 | −0.368759 |
|    | 8  | 0.0211000   | 0.0408571 | 0.608 | −0.061141 | 0.103341  |
|    | 9  | −0.1233667* | 0.0408571 | 0.004 | −0.205608 | −0.041126 |
|    | 10 | −0.1901000* | 0.0408571 | 0.000 | −0.272341 | −0.107859 |
|    | 11 | −0.4549000* | 0.0408571 | 0.000 | −0.537141 | −0.372659 |
|    | 12 | −0.0035333  | 0.0408571 | 0.931 | −0.085774 | 0.078708  |
|    | 13 | −0.1233667* | 0.0408571 | 0.004 | −0.205608 | −0.041126 |
|    | 14 | 0.0704000   | 0.0408571 | 0.092 | −0.011841 | 0.152641  |
|    | 15 | 0.0422333   | 0.0408571 | 0.307 | −0.040008 | 0.124474  |
|    | 16 | −0.0422667  | 0.0408571 | 0.306 | −0.124508 | 0.039974  |
|    | 17 | −0.0247000  | 0.0408571 | 0.548 | −0.106941 | 0.057541  |
|    | 19 | 0.0739833   | 0.0408571 | 0.077 | −0.008258 | 0.156224  |
|    | 20 | 0.0634000   | 0.0408571 | 0.128 | −0.018841 | 0.145641  |
|    | 21 | −0.1938000* | 0.0408571 | 0.000 | −0.276041 | −0.111559 |
|    | 22 | 0.2114333*  | 0.0408571 | 0.000 | 0.129192  | 0.293674  |
|    | 23 | −0.7399667* | 0.0408571 | 0.000 | −0.822208 | −0.657726 |
| 19 | 1  | −0.0211500  | 0.0408571 | 0.607 | −0.103391 | 0.061091  |
|    | 2  | −0.2008500* | 0.0408571 | 0.000 | −0.283091 | −0.118609 |
|    | 3  | 0.0475500   | 0.0408571 | 0.251 | −0.034691 | 0.129791  |
|    | 4  | −0.1726500* | 0.0408571 | 0.000 | −0.254891 | −0.090409 |

|    |    |             |           |       |           |           |
|----|----|-------------|-----------|-------|-----------|-----------|
|    | 5  | −0.0987500* | 0.0408571 | 0.020 | −0.180991 | −0.016509 |
|    | 6  | −0.1938167* | 0.0408571 | 0.000 | −0.276058 | −0.111576 |
|    | 7  | −0.5249833* | 0.0408571 | 0.000 | −0.607224 | −0.442742 |
|    | 8  | −0.0528833  | 0.0408571 | 0.202 | −0.135124 | 0.029358  |
|    | 9  | −0.1973500* | 0.0408571 | 0.000 | −0.279591 | −0.115109 |
|    | 10 | −0.2640833* | 0.0408571 | 0.000 | −0.346324 | −0.181842 |
|    | 11 | −0.5288833* | 0.0408571 | 0.000 | −0.611124 | −0.446642 |
|    | 12 | −0.0775167  | 0.0408571 | 0.064 | −0.159758 | 0.004724  |
|    | 13 | −0.1973500* | 0.0408571 | 0.000 | −0.279591 | −0.115109 |
|    | 14 | −0.0035833  | 0.0408571 | 0.930 | −0.085824 | 0.078658  |
|    | 15 | −0.0317500  | 0.0408571 | 0.441 | −0.113991 | 0.050491  |
|    | 16 | −0.1162500* | 0.0408571 | 0.007 | −0.198491 | −0.034009 |
|    | 17 | −0.0986833* | 0.0408571 | 0.020 | −0.180924 | −0.016442 |
|    | 18 | −0.0739833  | 0.0408571 | 0.077 | −0.156224 | 0.008258  |
|    | 20 | −0.0105833  | 0.0408571 | 0.797 | −0.092824 | 0.071658  |
|    | 21 | −0.2677833* | 0.0408571 | 0.000 | −0.350024 | −0.185542 |
|    | 22 | 0.1374500*  | 0.0408571 | 0.002 | 0.055209  | 0.219691  |
|    | 23 | −0.8139500* | 0.0408571 | 0.000 | −0.896191 | −0.731709 |
| 20 | 1  | −0.0105667  | 0.0408571 | 0.797 | −0.092808 | 0.071674  |
|    | 2  | −0.1902667* | 0.0408571 | 0.000 | −0.272508 | −0.108026 |
|    | 3  | 0.0581333   | 0.0408571 | 0.162 | −0.024108 | 0.140374  |
|    | 4  | −0.1620667* | 0.0408571 | 0.000 | −0.244308 | −0.079826 |
|    | 5  | −0.0881667* | 0.0408571 | 0.036 | −0.170408 | −0.005926 |
|    | 6  | −0.1832333* | 0.0408571 | 0.000 | −0.265474 | −0.100992 |
|    | 7  | −0.5144000* | 0.0408571 | 0.000 | −0.596641 | −0.432159 |
|    | 8  | −0.0423000  | 0.0408571 | 0.306 | −0.124541 | 0.039941  |
|    | 9  | −0.1867667* | 0.0408571 | 0.000 | −0.269008 | −0.104526 |
|    | 10 | −0.2535000* | 0.0408571 | 0.000 | −0.335741 | −0.171259 |
|    | 11 | −0.5183000* | 0.0408571 | 0.000 | −0.600541 | −0.436059 |
|    | 12 | −0.0669333  | 0.0408571 | 0.108 | −0.149174 | 0.015308  |
|    | 13 | −0.1867667* | 0.0408571 | 0.000 | −0.269008 | −0.104526 |
|    | 14 | 0.0070000   | 0.0408571 | 0.865 | −0.075241 | 0.089241  |
|    | 15 | −0.0211667  | 0.0408571 | 0.607 | −0.103408 | 0.061074  |
|    | 16 | −0.1056667* | 0.0408571 | 0.013 | −0.187908 | −0.023426 |
|    | 17 | −0.0881000* | 0.0408571 | 0.036 | −0.170341 | −0.005859 |
|    | 18 | −0.0634000  | 0.0408571 | 0.128 | −0.145641 | 0.018841  |
|    | 19 | 0.0105833   | 0.0408571 | 0.797 | −0.071658 | 0.092824  |
|    | 21 | −0.2572000* | 0.0408571 | 0.000 | −0.339441 | −0.174959 |
|    | 22 | 0.1480333*  | 0.0408571 | 0.001 | 0.065792  | 0.230274  |
|    | 23 | −0.8033667* | 0.0408571 | 0.000 | −0.885608 | −0.721126 |
| 21 | 1  | 0.2466333*  | 0.0408571 | 0.000 | 0.164392  | 0.328874  |

|    |    |             |           |       |           |           |
|----|----|-------------|-----------|-------|-----------|-----------|
|    | 2  | 0.0669333   | 0.0408571 | 0.108 | −0.015308 | 0.149174  |
|    | 3  | 0.3153333*  | 0.0408571 | 0.000 | 0.233092  | 0.397574  |
|    | 4  | 0.0951333*  | 0.0408571 | 0.024 | 0.012892  | 0.177374  |
|    | 5  | 0.1690333*  | 0.0408571 | 0.000 | 0.086792  | 0.251274  |
|    | 6  | 0.0739667   | 0.0408571 | 0.077 | −0.008274 | 0.156208  |
|    | 7  | −0.2572000* | 0.0408571 | 0.000 | −0.339441 | −0.174959 |
|    | 8  | 0.2149000*  | 0.0408571 | 0.000 | 0.132659  | 0.297141  |
|    | 9  | 0.0704333   | 0.0408571 | 0.091 | −0.011808 | 0.152674  |
|    | 10 | 0.0037000   | 0.0408571 | 0.928 | −0.078541 | 0.085941  |
|    | 11 | −0.2611000* | 0.0408571 | 0.000 | −0.343341 | −0.178859 |
|    | 12 | 0.1902667*  | 0.0408571 | 0.000 | 0.108026  | 0.272508  |
|    | 13 | 0.0704333   | 0.0408571 | 0.091 | −0.011808 | 0.152674  |
|    | 14 | 0.2642000*  | 0.0408571 | 0.000 | 0.181959  | 0.346441  |
|    | 15 | 0.2360333*  | 0.0408571 | 0.000 | 0.153792  | 0.318274  |
|    | 16 | 0.1515333*  | 0.0408571 | 0.001 | 0.069292  | 0.233774  |
|    | 17 | 0.1691000*  | 0.0408571 | 0.000 | 0.086859  | 0.251341  |
|    | 18 | 0.1938000*  | 0.0408571 | 0.000 | 0.111559  | 0.276041  |
|    | 19 | 0.2677833*  | 0.0408571 | 0.000 | 0.185542  | 0.350024  |
|    | 20 | 0.2572000*  | 0.0408571 | 0.000 | 0.174959  | 0.339441  |
|    | 22 | 0.4052333*  | 0.0408571 | 0.000 | 0.322992  | 0.487474  |
|    | 23 | −0.5461667* | 0.0408571 | 0.000 | −0.628408 | −0.463926 |
| 22 | 1  | −0.1586000* | 0.0408571 | 0.000 | −0.240841 | −0.076359 |
|    | 2  | −0.3383000* | 0.0408571 | 0.000 | −0.420541 | −0.256059 |
|    | 3  | −0.0899000* | 0.0408571 | 0.033 | −0.172141 | −0.007659 |
|    | 4  | −0.3101000* | 0.0408571 | 0.000 | −0.392341 | −0.227859 |
|    | 5  | −0.2362000* | 0.0408571 | 0.000 | −0.318441 | −0.153959 |
|    | 6  | −0.3312667* | 0.0408571 | 0.000 | −0.413508 | −0.249026 |
|    | 7  | −0.6624333* | 0.0408571 | 0.000 | −0.744674 | −0.580192 |
|    | 8  | −0.1903333* | 0.0408571 | 0.000 | −0.272574 | −0.108092 |
|    | 9  | −0.3348000* | 0.0408571 | 0.000 | −0.417041 | −0.252559 |
|    | 10 | −0.4015333* | 0.0408571 | 0.000 | −0.483774 | −0.319292 |
|    | 11 | −0.6663333* | 0.0408571 | 0.000 | −0.748574 | −0.584092 |
|    | 12 | −0.2149667* | 0.0408571 | 0.000 | −0.297208 | −0.132726 |
|    | 13 | −0.3348000* | 0.0408571 | 0.000 | −0.417041 | −0.252559 |
|    | 14 | −0.1410333* | 0.0408571 | 0.001 | −0.223274 | −0.058792 |
|    | 15 | −0.1692000* | 0.0408571 | 0.000 | −0.251441 | −0.086959 |
|    | 16 | −0.2537000* | 0.0408571 | 0.000 | −0.335941 | −0.171459 |
|    | 17 | −0.2361333* | 0.0408571 | 0.000 | −0.318374 | −0.153892 |
|    | 18 | −0.2114333* | 0.0408571 | 0.000 | −0.293674 | −0.129192 |
|    | 19 | −0.1374500* | 0.0408571 | 0.002 | −0.219691 | −0.055209 |
|    | 20 | −0.1480333* | 0.0408571 | 0.001 | −0.230274 | −0.065792 |



|    |    |             |           |       |           |           |
|----|----|-------------|-----------|-------|-----------|-----------|
| 23 | 21 | −0.4052333* | 0.0408571 | 0.000 | −0.487474 | −0.322992 |
|    | 23 | −0.9514000* | 0.0408571 | 0.000 | −1.033641 | −0.869159 |
|    | 1  | 0.7928000*  | 0.0408571 | 0.000 | 0.710559  | 0.875041  |
|    | 2  | 0.6131000*  | 0.0408571 | 0.000 | 0.530859  | 0.695341  |
|    | 3  | 0.8615000*  | 0.0408571 | 0.000 | 0.779259  | 0.943741  |
|    | 4  | 0.6413000*  | 0.0408571 | 0.000 | 0.559059  | 0.723541  |
|    | 5  | 0.7152000*  | 0.0408571 | 0.000 | 0.632959  | 0.797441  |
|    | 6  | 0.6201333*  | 0.0408571 | 0.000 | 0.537892  | 0.702374  |
|    | 7  | 0.2889667*  | 0.0408571 | 0.000 | 0.206726  | 0.371208  |
|    | 8  | 0.7610667*  | 0.0408571 | 0.000 | 0.678826  | 0.843308  |
|    | 9  | 0.6166000*  | 0.0408571 | 0.000 | 0.534359  | 0.698841  |
|    | 10 | 0.5498667*  | 0.0408571 | 0.000 | 0.467626  | 0.632108  |
|    | 11 | 0.2850667*  | 0.0408571 | 0.000 | 0.202826  | 0.367308  |
|    | 12 | 0.7364333*  | 0.0408571 | 0.000 | 0.654192  | 0.818674  |
|    | 13 | 0.6166000*  | 0.0408571 | 0.000 | 0.534359  | 0.698841  |
|    | 14 | 0.8103667*  | 0.0408571 | 0.000 | 0.728126  | 0.892608  |
|    | 15 | 0.7822000*  | 0.0408571 | 0.000 | 0.699959  | 0.864441  |
|    | 16 | 0.6977000*  | 0.0408571 | 0.000 | 0.615459  | 0.779941  |
|    | 17 | 0.7152667*  | 0.0408571 | 0.000 | 0.633026  | 0.797508  |
|    | 18 | 0.7399667*  | 0.0408571 | 0.000 | 0.657726  | 0.822208  |
|    | 19 | 0.8139500*  | 0.0408571 | 0.000 | 0.731709  | 0.896191  |
|    | 20 | 0.8033667*  | 0.0408571 | 0.000 | 0.721126  | 0.885608  |
|    | 21 | 0.5461667*  | 0.0408571 | 0.000 | 0.463926  | 0.628408  |
|    | 22 | 0.9514000*  | 0.0408571 | 0.000 | 0.869159  | 1.033641  |

\*. The mean difference is significant at the 0.05 level.
